# Supplementary material
Source: PubMed Central journal article supplement (PMC6779506)
Supplement: NIHMS1048833-supplement-Supp_info.pdf [file NIHMS1048833-supplement-Supp_info.pdf]

*Supporting Information for:*

# **A Nontrigonal Tricoordinate Phosphorus Ligand Exhibiting Reversible ‘Nonspectator’ L/X–Switching**

Gregory T. Cleveland<sup>†</sup> and Alexander T. Radosevich\*<sup>†</sup>

*† Department of Chemistry, Massachusetts Institute of Technology, Cambridge, Massachusetts 02139, United States*

## Contents

|      |                                                 |     |
|------|-------------------------------------------------|-----|
| I.   | General Materials and Methods.....              | S2  |
| II.  | Synthetic Procedures.....                       | S3  |
| III. | Crystallographic Procedures and Data.....       | S8  |
| IV.  | DFT Calculations.....                           | S49 |
|      | a. General Computational Information            |     |
|      | b. Method for Calculating Fluoride Ion Affinity |     |
|      | c. Cartesian Coordinates of Computed Structures |     |
| V.   | Multinuclear NMR Spectra.....                   | S57 |
| VI.  | References.....                                 | S85 |

## I. General Materials and Methods.

All reagents were purchased from Sigma-Aldrich, Alfa Aesar, ACROS, TCI, or Oakwood Chemicals, and used as received unless otherwise noted. Diethyl ether (Et<sub>2</sub>O), methylene chloride (CH<sub>2</sub>Cl<sub>2</sub>), tetrahydrofuran (THF), acetonitrile (MeCN) and pentane were dried according to the method of Grubbs<sup>1</sup> as modified by Bergman<sup>2</sup> using a Glass Contour Solvent Purification System. All glassware was oven-dried at 120 °C prior to use. All reactions were carried out under a dry nitrogen atmosphere (Schlenk line or glovebox) unless otherwise noted. Solution NMR spectra other than <sup>57</sup>Fe/<sup>31</sup>P 2-D spectra were recorded on a JEOL 500 MHz NMR and processed with the MestraNova software. <sup>57</sup>Fe/<sup>31</sup>P 2-D spectra were recorded on a Bruker 600 MHz NMR and processed with the MestraNova software. <sup>1</sup>H NMR chemical shifts are given in ppm with respect to solvent residual peaks (CDCl<sub>3</sub>, 7.26 ppm; CD<sub>2</sub>Cl<sub>2</sub>, 5.32 ppm; CD<sub>3</sub>CN, 1.94 ppm; C<sub>6</sub>D<sub>6</sub>, 7.16 ppm), <sup>13</sup>C{<sup>1</sup>H} NMR shifts are given in ppm with respect to solvent residual peaks (CDCl<sub>3</sub>, 77.16 ppm; CD<sub>2</sub>Cl<sub>2</sub>, 53.84 ppm; CD<sub>3</sub>CN, 1.32, 118.26 ppm; C<sub>6</sub>D<sub>6</sub>, 128.06 ppm), <sup>31</sup>P{<sup>1</sup>H} NMR shifts are given in ppm with respect to 85% phosphoric acid (0 ppm), <sup>19</sup>F NMR shifts are given in ppm with respect to CFC<sub>3</sub> (0 ppm), <sup>57</sup>Fe NMR shifts are given in ppm with respect to Fe(CO)<sub>5</sub> (0 ppm). Coupling constants are reported as *J*-values in Hz. High resolution ESI Mass spectrometry spectra were obtained from the Mass Spectrometry Laboratory at the School of Chemical Sciences, University of Illinois at Urbana-Champaign. X-ray diffraction data was collected on a Bruker SMART APEX CCD area detector system equipped with a graphite monochromator and a MoK $\alpha$  fine-focus sealed tube ( $\lambda = 0.71073 \text{ \AA}$ ). Raw data integration and reduction were performed with the SAINT<sup>3</sup> and SADABS<sup>4</sup> programs. Structures were solved using direct methods using SHELXT<sup>5</sup> and refined using least-squares methods on F<sup>2</sup> using the SHELXL software package. All non-hydrogen atoms were refined with anisotropic displacement parameters. All hydrogen atoms were fixed in their ideal geometries. Graphical representation was done using the XP program.

## II. Synthetic Procedures.

### Synthesis of **1a**:

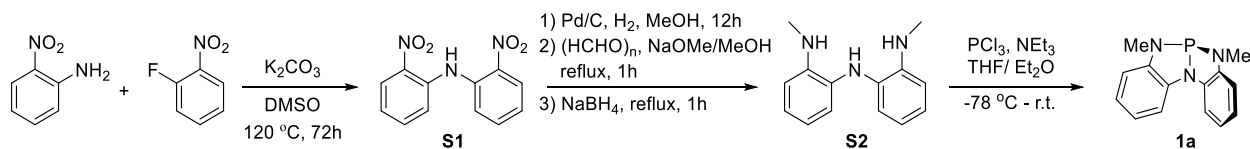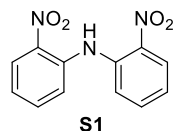

**S1**

**Bis(2-nitrophenyl)amine (S1)**: Synthesized according to a modified literature procedure.<sup>6</sup> 1-Fluoro-2-nitrobenzene (15.8 mL, 150 mmol, 1 equiv) was added to a solution of 2-nitroaniline (20.7 g, 150 mmol, 1 equiv) and potassium carbonate

(24.9 g, 180 mmol, 1.2 equiv) in DMSO (400 mL). The reaction mixture was heated with stirring at 120 °C for 72h. The reaction mixture was cooled and H<sub>2</sub>O (400 mL) was added to generate an orange precipitate. The solid was collected by filtration, washed with H<sub>2</sub>O (1000 mL), and dried under vacuum to give the product as an orange solid (35.8 g, 92.1%). The product was used in the next step without further purification.

<sup>1</sup>H NMR (500 MHz, CDCl<sub>3</sub>) δ 11.01 (s, 1H, NH), 8.18 (dd, *J* = 8.4, 1.5 Hz, 2H), 7.58-7.53 (m, 4H), 7.09 (ddd, *J* = 8.4, 7.1, 1.4 Hz, 2H).

<sup>13</sup>C{<sup>1</sup>H} NMR (126 MHz, CDCl<sub>3</sub>) δ 138.6, 137.3, 135.0, 126.9, 122.0, 119.9.

HRMS calculated for C<sub>12</sub>H<sub>10</sub>N<sub>3</sub>O<sub>4</sub> [M+H]<sup>+</sup> 260.0671. Found 260.0670.

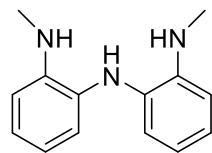

**S2**

**Bis(2-methylaminophenyl)amine (S2)**: Synthesized according to a modified literature procedure.<sup>6</sup> Palladium on carbon (300 mg, 10% by weight) was added to a suspension of **S1** (3.00 g, 11.5 mmol, 1 equiv) in MeOH (50 mL). The reaction mixture was placed in a high-pressure reactor and charged with

hydrogen (400 psi). The reaction was stirred for 12 h. Following venting of the reactor, the reaction mixture was quickly filtered over celite and diluted with MeOH (150 mL). Paraformaldehyde (3.44 g, 115 mmol, 10 equiv) and then sodium methoxide (25% in MeOH, 7.80 mL) were added and the reaction mixture was heated to reflux for 1 h. The red solution was cooled to ambient temperature and then placed in an ice bath. Sodium borohydride (4.34 g, 115 mmol, 10 equiv) was then added slowly in small portions. The reaction mixture was subsequently heated to reflux and stirred for 1

h to give a colorless solution. The mixture was cooled and aqueous sodium hydroxide (150 mL, 1 M) was added to precipitate a solid. The flask was stored in a freezer for several hours and then the solid was collected on a glass frit. The solid was dried under vacuum overnight at 40 °C to afford the product as a light purple solid (1.90 g, 72.7%).

**<sup>1</sup>H NMR** (500 MHz, CDCl<sub>3</sub>) δ 7.04 (m, 2H), 6.68 (m, 6H), 4.87 (s 1H), 3.74 (q, *J* = 5.4 Hz, 2H), 2.87 (d, *J* = 5.4 Hz, 6H).

**<sup>13</sup>C{<sup>1</sup>H} NMR** (126 MHz, CDCl<sub>3</sub>) δ 141.9, 130.8, 123.8, 119.8, 118.0, 110.8, 30.9.

**HRMS** calculated for C<sub>14</sub>H<sub>18</sub>N<sub>3</sub> [M+H]<sup>+</sup> 228.1501. Found 228.1504.

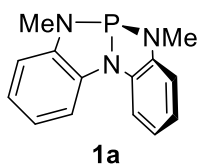

**1a:** Synthesized according to a modified literature procedure.<sup>6</sup> Phosphorus trichloride (.64 mL, 7.3 mmol, 1 equiv) was added to Et<sub>2</sub>O (80 mL) in a flame-dried, nitrogen filled flask and cooled to -78 °C. **S2** (1.7 g, 7.3 mmol, 1.2 equiv) was dissolved in THF (10 mL) and added dropwise via syringe. Triethylamine (7.1 mL, 51 mmol, 7.0 equiv) in Et<sub>2</sub>O (15 mL) was added dropwise via syringe. The reaction was stirred at -78 °C for 1 h and then warmed to room temperature and stirred for 4 h. The volatiles were removed, and the resulting solid residue was brought into a nitrogen filled glovebox. The solid was triturated with pentane and passed over a plug of celite. The filtrate was evaporated to give a slightly pink solid. This solid was dissolved in minimal Et<sub>2</sub>O and cooled to -35 °C to induce crystallization of the title product as colorless crystals (1.2 g, 62%).

**<sup>1</sup>H NMR** (500 MHz, CDCl<sub>3</sub>) δ 7.43 (dd, *J* = 7.8, 1.1 Hz, 2H), 7.02 (td, *J* = 7.7, 1.2 Hz, 2H), 6.83 (td, *J* = 7.7, 1.2 Hz, 2H), 6.60 (d, *J* = 7.7 Hz, 2H), 3.08 (d, *J* = 8.4 Hz, 6H).

**<sup>13</sup>C{<sup>1</sup>H} NMR** (126 MHz, CDCl<sub>3</sub>) δ 141.3 (d, *J* = 7.1 Hz), 139.6, 124.4, 119.0, 117.1 (d, *J* = 6.0 Hz), 108.7, 29.9 (d, *J* = 30.7 Hz).

**<sup>31</sup>P{<sup>1</sup>H} NMR** (203 MHz, CDCl<sub>3</sub>) δ 160.4.

**HRMS** calculated for C<sub>14</sub>H<sub>15</sub>N<sub>3</sub>P [M+H]<sup>+</sup> 256.1004. Found 256.1003.

Synthesis of iron cyclopentadienyl dicarbonyl complexes:

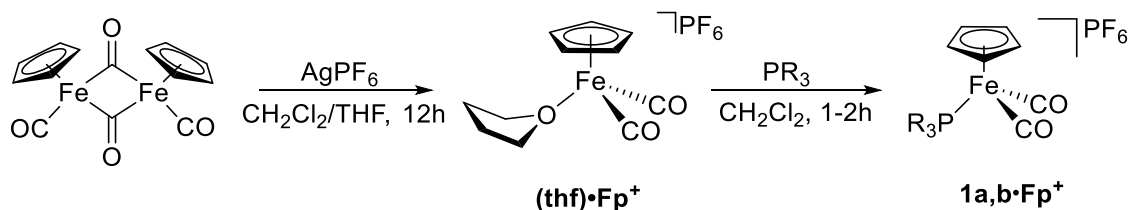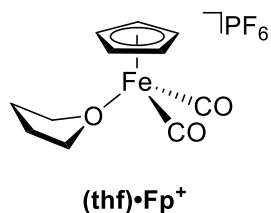

*Ironcyclopentadienyldicarbonyl(tetrahydrofuran)hexafluorophosphate*

((thf)•Fp<sup>+</sup>): Synthesized according to a modified procedure.<sup>7</sup>

Cyclopentadienyliron dicarbonyl dimer (1.00 g, 2.83 mmol, 0.5 eq) was dissolved in a 2:1 mixture of CH<sub>2</sub>Cl<sub>2</sub> (50 mL) and THF (25 mL). Silver hexafluorophosphate (1.43 g, 5.65 mmol, 1.0 eq) was added and the reaction was stirred overnight to produce a red solution with a grey precipitate. The reaction was filtered through a plug of celite and the filtrate was evaporated to give a light red solid, which was washed further with ether and dried under vacuum to give the product as a light red solid (1.02 g, 45.7%).

<sup>1</sup>H NMR (500 MHz, CD<sub>2</sub>Cl<sub>2</sub>) δ 5.38 (s, 5H), 3.45 (s, 4H), 1.83 (s, 4H).

<sup>13</sup>C{<sup>1</sup>H} NMR (126 MHz, CD<sub>2</sub>Cl<sub>2</sub>) δ 208.9, 85.8, 82.3, 26.6.

<sup>31</sup>P{<sup>1</sup>H} NMR (203 MHz, CD<sub>2</sub>Cl<sub>2</sub>) δ -144.0 (sept, J = 708 Hz, PF<sub>6</sub><sup>-</sup>).

<sup>19</sup>F NMR (471 MHz, CD<sub>2</sub>Cl<sub>2</sub>) δ -72.9 (d, J = 707 Hz, PF<sub>6</sub><sup>-</sup>).

FTIR (ATR) ν(cm<sup>-1</sup>): 2030, 2073.

HRMS calculated for C<sub>11</sub>H<sub>13</sub>O<sub>3</sub>Fe [M]<sup>+</sup> 249.0214. Found 249.0221.

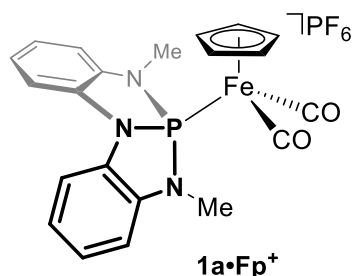

**1a•Fp<sup>+</sup>:** (thf)•Fp<sup>+</sup> (126 mg, 0.327 mmol, 1 equiv) was dissolved in CH<sub>2</sub>Cl<sub>2</sub> (3 mL). **1a** (100 mg, 0.392 mmol, 1.2 equiv) in CH<sub>2</sub>Cl<sub>2</sub> (3 mL) was added and the reaction was stirred for 2 h. The solvent was removed, and the resulting solid was washed with ether and dried to give the product as a golden yellow solid (163 mg, 81.8%). Single crystals for X-ray diffraction were obtained by adding THF to the

solid and passing the suspension through a syringe filter to give a saturated solution, to which pentane was then slowly added via vapor diffusion at room temperature overnight.

**<sup>1</sup>H NMR** (500 MHz, CDCl<sub>3</sub>) δ 7.64 (d, *J* = 7.9 Hz, 2H), 7.19 (t, *J* = 7.7 Hz, 2H), 7.03 (t, *J* = 7.7 Hz, 2H), 6.83 (d, *J* = 7.8 Hz, 2H), 5.37 (s, 5H), 3.16 (d, *J* = 10.7 Hz, 6H).

**<sup>13</sup>C{<sup>1</sup>H} NMR** (126 MHz, CDCl<sub>3</sub>) δ 207.8 (d, *J* = 32.5 Hz), 139.0, 138.9, 137.3, 126.0, 121.6, 109.2 (d, *J* = 6.1 Hz), 88.7, 28.9 (d, *J* = 9.0 Hz).

**<sup>31</sup>P{<sup>1</sup>H} NMR** (203 MHz, CD<sub>3</sub>CN) δ 183.5, -144.0 (sept, *J* = 708 Hz, PF<sub>6</sub><sup>-</sup>).

**<sup>19</sup>F NMR** (471 MHz, CD<sub>3</sub>CN) δ -72.9 (d, *J* = 707 Hz, PF<sub>6</sub><sup>-</sup>).

**<sup>57</sup>Fe NMR** (16 Hz, CD<sub>3</sub>CN) δ 616 (d, *J* = 59.5 Hz).

**FTIR** (ATR) ν(cm<sup>-1</sup>): 2017, 2061.

**HRMS** calculated for C<sub>21</sub>H<sub>19</sub>N<sub>3</sub>O<sub>2</sub>PFe [M]<sup>+</sup> 432.0564. Found 432.0565.

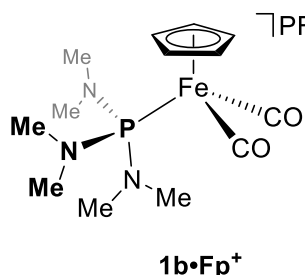

**1b•Fp<sup>+</sup>**: Complex (thf)•Fp<sup>+</sup> (0.13 mg, 0.33 mmol, 1 equiv) was dissolved in CH<sub>2</sub>Cl<sub>2</sub> (3 mL). **1b** (0.71 mL, 0.39 mmol, 1.2 equiv) in CH<sub>2</sub>Cl<sub>2</sub> (3 mL) was added and the reaction was stirred for 1 h. The volatiles were removed, and the resulting solid was washed with ether and dried to give the product as a brown solid (0.13 g, 85%). Single crystals for X-ray diffraction were obtained by adding THF to the solid

and passing the suspension through a syringe filter to give a saturated solution, to which pentane was then added slowly via vapor diffusion at room temperature overnight.

**<sup>1</sup>H NMR** (500 MHz, CDCl<sub>3</sub>) δ 5.41 (s, 5H), 2.64 (d, *J* = 9.8 Hz, 18H).

**<sup>13</sup>C{<sup>1</sup>H} NMR** (126 MHz, CDCl<sub>3</sub>) δ 212.2 (d, *J* = 34.0 Hz), 87.9, 38.5 (d, *J* = 4.5 Hz).

**<sup>31</sup>P{<sup>1</sup>H} NMR** (203 MHz, CD<sub>3</sub>CN) δ 141.4, -144.0 (sept, *J* = 708 Hz, PF<sub>6</sub><sup>-</sup>).

**<sup>19</sup>F NMR** (471 MHz, CD<sub>3</sub>CN) δ -72.9 (d, *J* = 707 Hz, PF<sub>6</sub><sup>-</sup>).

**<sup>57</sup>Fe NMR** (16 Hz, CD<sub>3</sub>CN) δ 688 (d, *J* = 50.4 Hz).

**FTIR** (ATR) ν(cm<sup>-1</sup>): 2000, 2045.

**HRMS** calculated for C<sub>13</sub>H<sub>23</sub>N<sub>3</sub>O<sub>2</sub>PFe [M]<sup>+</sup> 340.0877. Found 340.0881.

Fluorination of  $[Fp(PR_3)]PF_6$  complexes:

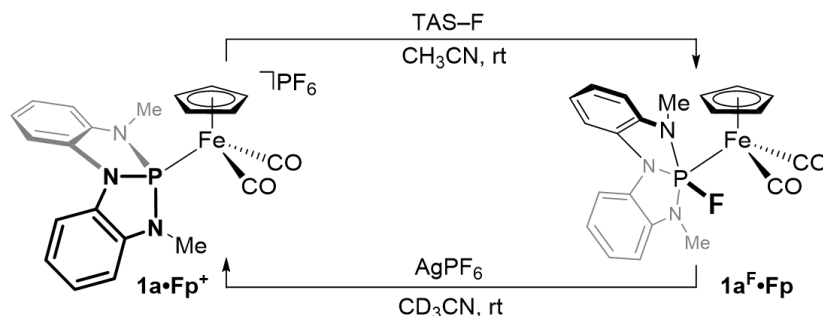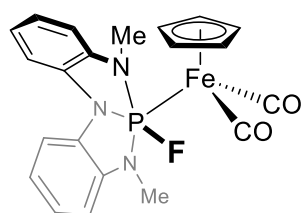

**1a<sup>F</sup>•Fp:** **1a•Fp<sup>+</sup>** (40 mg, 0.069 mmol, 1 equiv) was dissolved in MeCN (4.5 mL). Tris(dimethylamino)sulfonium trimethyldifluorosilicate (19 mg, 0.069 mmol, 1 equiv) in MeCN (1.5 mL) was added slowly, immediately causing a color change from yellow to orange. After stirring for 1 h, the volatiles were removed to give an orange residue. This residue was triturated with ether (15 mL), filtered through a syringe filter, and evaporated to give the product as an orange solid (20 mg, 44%). A single crystal of suitable quality for X-ray diffraction was obtained by slow evaporation of a saturated solution of **1a<sup>F</sup>•Fp** in CH<sub>2</sub>Cl<sub>2</sub> at -30 °C over the course of 2 weeks.

**<sup>1</sup>H NMR** (500 MHz, C<sub>6</sub>D<sub>6</sub>) δ 7.20 (d, *J* = 8.7 Hz, 2H), 6.87-6.94 (m, 4H), 6.54 (d, *J* = 7.5 Hz, 2H), 3.99 (s, 5H), 3.11 (d, *J* = 7.6 Hz, 6H).

**<sup>13</sup>C{<sup>1</sup>H} NMR** (126 MHz, C<sub>6</sub>D<sub>6</sub>) δ 213.3 (dd, *J* = 44.4, 5.5 Hz), 137.7 (d, *J* = 20.3 Hz), 133.8 (d, *J* = 11.0 Hz), 120.8, 119.3, 110.2 (d, *J* = 4.0 Hz), 108.9 (dd, *J* = 7.9, 2.2 Hz), 83.8, 34.1 (dd, *J* = 16.6, 5.6 Hz).

**<sup>31</sup>P{<sup>1</sup>H} NMR** (203 MHz, C<sub>6</sub>D<sub>6</sub>) δ -3.0 (d, *J* = 971 Hz).

**<sup>19</sup>F NMR** (471 MHz, C<sub>6</sub>D<sub>6</sub>) δ 27.4 (d, *J* = 971 Hz).

**<sup>57</sup>Fe NMR** (16 Hz, C<sub>6</sub>D<sub>6</sub>) δ 1013 (d, *J* = 53.5 Hz).

**FTIR** (ATR) ν(cm<sup>-1</sup>): 1952, 2007.

**HRMS** calculated for C<sub>21</sub>H<sub>19</sub>N<sub>3</sub>O<sub>2</sub>PFe [M-F]<sup>+</sup> 432.0564. Found 432.0568.

Fluoride abstraction was performed by adding AgPF<sub>6</sub> (5.6 mg, .022 mmol, 1 equiv) to a solution of **1a<sup>F</sup>•Fp** (10 mg, .022 mmol, 1 equiv) in CD<sub>3</sub>CN (1 mL), causing immediate precipitation of a solid and changing the color from orange to yellow. This solution was passed through a syringe filter and immediately analyzed by NMR showing regeneration of **1a•Fp<sup>+</sup>**.

### III. Crystallographic Procedures and Data

Compound **1a**•Fp<sup>+</sup>:

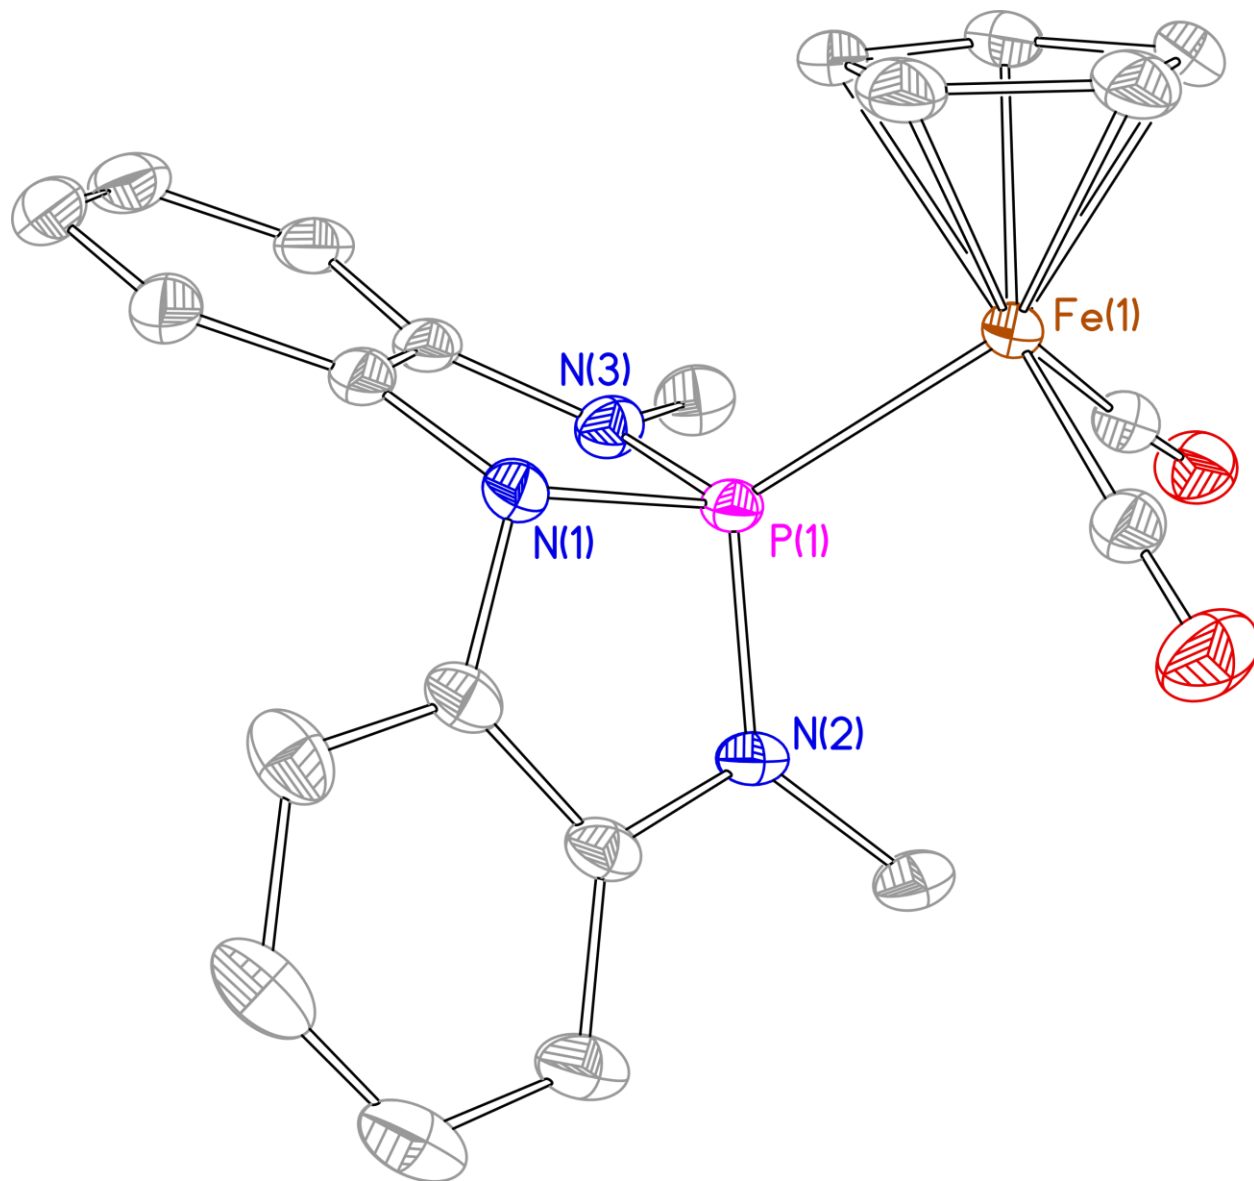



**Table S1.** Crystal data and structure refinement for **1a**•Fp<sup>+</sup>.

|                                   |                                                                                                             |
|-----------------------------------|-------------------------------------------------------------------------------------------------------------|
| Identification code               | fpnnp_10                                                                                                    |
| Empirical formula                 | C <sub>25</sub> H <sub>27</sub> F <sub>6</sub> Fe N <sub>3</sub> O <sub>3</sub> P <sub>2</sub>              |
| Formula weight                    | 649.28                                                                                                      |
| Temperature                       | 100(2) K                                                                                                    |
| Wavelength                        | 0.71073 Å                                                                                                   |
| Crystal system                    | Monoclinic                                                                                                  |
| Space group                       | P2 <sub>1</sub> /c                                                                                          |
| Unit cell dimensions              | a = 10.7202(6) Å      α = 90°.<br>b = 18.7967(10) Å      β = 105.406(2)°.<br>c = 13.6423(8) Å      γ = 90°. |
| Volume                            | 2650.2(3) Å <sup>3</sup>                                                                                    |
| Z                                 | 4                                                                                                           |
| Density (calculated)              | 1.627 Mg/m <sup>3</sup>                                                                                     |
| Absorption coefficient            | 0.767 mm <sup>-1</sup>                                                                                      |
| F(000)                            | 1328                                                                                                        |
| Crystal size                      | 0.270 x 0.060 x 0.030 mm <sup>3</sup>                                                                       |
| Theta range for data collection   | 2.167 to 32.618°.                                                                                           |
| Index ranges                      | -16 ≤ h ≤ 16, -28 ≤ k ≤ 28, -20 ≤ l ≤ 20                                                                    |
| Reflections collected             | 269152                                                                                                      |
| Independent reflections           | 9682 [R(int) = 0.0542]                                                                                      |
| Completeness to theta = 25.242°   | 99.9 %                                                                                                      |
| Absorption correction             | Semi-empirical from equivalents                                                                             |
| Max. and min. transmission        | 0.7464 and 0.6843                                                                                           |
| Refinement method                 | Full-matrix least-squares on F <sup>2</sup>                                                                 |
| Data / restraints / parameters    | 9679 / 714 / 392                                                                                            |
| Goodness-of-fit on F <sup>2</sup> | 1.079                                                                                                       |
| Final R indices [I > 2σ(I)]       | R1 = 0.0381, wR2 = 0.1046                                                                                   |
| R indices (all data)              | R1 = 0.0463, wR2 = 0.1102                                                                                   |
| Extinction coefficient            | n/a                                                                                                         |
| Largest diff. peak and hole       | 1.010 and -0.552 e.Å <sup>-3</sup>                                                                          |

**Table S2.** Atomic coordinates ( $\times 10^4$ ) and equivalent isotropic displacement parameters ( $\text{\AA}^2 \times 10^3$ ) for 2a.  $U(\text{eq})$  is defined as one third of the trace of the orthogonalized  $U^{ij}$  tensor.

|       | x        | y       | z       | $U(\text{eq})$ |
|-------|----------|---------|---------|----------------|
| Fe(1) | 6892(1)  | 3762(1) | 6290(1) | 18(1)          |
| P(1)  | 7251(1)  | 3108(1) | 5073(1) | 17(1)          |
| O(2)  | 4378(1)  | 4318(1) | 5143(1) | 32(1)          |
| N(1)  | 8598(1)  | 2583(1) | 5248(1) | 20(1)          |
| O(1)  | 8461(2)  | 4935(1) | 5863(1) | 37(1)          |
| N(2)  | 7566(1)  | 3554(1) | 4106(1) | 21(1)          |
| N(3)  | 6236(1)  | 2414(1) | 4764(1) | 22(1)          |
| C(16) | 6895(2)  | 1766(1) | 5015(1) | 23(1)          |
| C(26) | 8742(1)  | 3343(1) | 3924(1) | 20(1)          |
| C(21) | 9355(2)  | 2800(1) | 4579(1) | 22(1)          |
| C(7)  | 5368(2)  | 4101(1) | 5566(1) | 24(1)          |
| C(11) | 8240(2)  | 1850(1) | 5282(1) | 22(1)          |
| C(4)  | 6415(2)  | 3917(1) | 7674(1) | 27(1)          |
| C(15) | 6349(2)  | 1096(1) | 5022(1) | 30(1)          |
| C(5)  | 7770(2)  | 3938(1) | 7845(1) | 29(1)          |
| C(25) | 9303(2)  | 3629(1) | 3205(1) | 28(1)          |
| C(3)  | 5982(2)  | 3232(1) | 7271(1) | 25(1)          |
| C(23) | 11108(2) | 2827(1) | 3809(1) | 34(1)          |
| C(6)  | 7839(2)  | 4481(1) | 6012(1) | 25(1)          |
| C(27) | 6880(2)  | 4177(1) | 3593(1) | 27(1)          |
| C(22) | 10543(2) | 2538(1) | 4537(1) | 28(1)          |
| C(2)  | 7068(2)  | 2838(1) | 7197(1) | 26(1)          |
| C(24) | 10500(2) | 3362(1) | 3161(1) | 34(1)          |
| C(12) | 9068(2)  | 1272(1) | 5520(1) | 31(1)          |
| C(1)  | 8183(2)  | 3270(1) | 7536(1) | 28(1)          |
| C(17) | 4828(2)  | 2461(1) | 4528(1) | 28(1)          |
| C(14) | 7184(2)  | 512(1)  | 5244(1) | 37(1)          |
| C(13) | 8511(2)  | 596(1)  | 5479(1) | 37(1)          |
| P(1S) | 3416(1)  | 3812(1) | 1702(1) | 22(1)          |
| F(6S) | 3094(1)  | 3727(1) | 490(1)  | 32(1)          |
| F(5S) | 4321(1)  | 4481(1) | 1650(1) | 31(1)          |

|        |          |          |          |       |
|--------|----------|----------|----------|-------|
| F(4S)  | 2190(1)  | 4329(1)  | 1564(1)  | 34(1) |
| F(3S)  | 4640(1)  | 3293(1)  | 1836(1)  | 34(1) |
| F(2S)  | 3722(1)  | 3896(1)  | 2909(1)  | 38(1) |
| F(1S)  | 2504(1)  | 3142(1)  | 1744(1)  | 39(1) |
| C(1S)  | 2305(2)  | 3695(1)  | 6305(2)  | 38(1) |
| C(4S)  | 2911(2)  | 4235(1)  | 7901(1)  | 34(1) |
| O(1S)  | 3316(2)  | 4068(2)  | 6992(3)  | 40(1) |
| C(2S)  | 1224(3)  | 3582(2)  | 6793(2)  | 34(1) |
| C(3S)  | 1461(9)  | 4168(6)  | 7592(8)  | 36(1) |
| O(1SB) | 3355(12) | 3783(10) | 7305(11) | 46(3) |
| C(2SB) | 1098(12) | 3938(11) | 6505(11) | 41(3) |
| C(3SB) | 1400(40) | 4150(30) | 7700(30) | 41(5) |

---

**Table S3.** Bond lengths [ $\text{\AA}$ ] and angles [ $^\circ$ ] for 2a.

---

|             |            |
|-------------|------------|
| Fe(1)-C(7)  | 1.7879(17) |
| Fe(1)-C(6)  | 1.7893(16) |
| Fe(1)-C(1)  | 2.1003(16) |
| Fe(1)-C(4)  | 2.1038(15) |
| Fe(1)-C(3)  | 2.1054(16) |
| Fe(1)-C(5)  | 2.1052(16) |
| Fe(1)-C(2)  | 2.1130(15) |
| Fe(1)-P(1)  | 2.1809(4)  |
| P(1)-N(2)   | 1.6713(12) |
| P(1)-N(3)   | 1.6790(13) |
| P(1)-N(1)   | 1.7131(13) |
| O(2)-C(7)   | 1.140(2)   |
| N(1)-C(21)  | 1.4329(19) |
| N(1)-C(11)  | 1.4338(19) |
| O(1)-C(6)   | 1.135(2)   |
| N(2)-C(26)  | 1.406(2)   |
| N(2)-C(27)  | 1.458(2)   |
| N(3)-C(16)  | 1.404(2)   |
| N(3)-C(17)  | 1.460(2)   |
| C(16)-C(15) | 1.390(2)   |
| C(16)-C(11) | 1.399(2)   |
| C(26)-C(25) | 1.388(2)   |
| C(26)-C(21) | 1.400(2)   |
| C(21)-C(22) | 1.381(2)   |
| C(11)-C(12) | 1.386(2)   |
| C(4)-C(5)   | 1.409(3)   |
| C(4)-C(3)   | 1.429(2)   |
| C(4)-H(4)   | 0.9500     |
| C(15)-C(14) | 1.398(3)   |
| C(15)-H(15) | 0.9500     |
| C(5)-C(1)   | 1.431(3)   |
| C(5)-H(5)   | 0.9500     |
| C(25)-C(24) | 1.395(3)   |
| C(25)-H(25) | 0.9500     |

|              |            |
|--------------|------------|
| C(3)-C(2)    | 1.406(2)   |
| C(3)-H(3)    | 0.9500     |
| C(23)-C(24)  | 1.383(3)   |
| C(23)-C(22)  | 1.402(3)   |
| C(23)-H(23)  | 0.9500     |
| C(27)-H(27A) | 0.9800     |
| C(27)-H(27B) | 0.9800     |
| C(27)-H(27C) | 0.9800     |
| C(22)-H(22)  | 0.9500     |
| C(2)-C(1)    | 1.418(3)   |
| C(2)-H(2)    | 0.9500     |
| C(24)-H(24)  | 0.9500     |
| C(12)-C(13)  | 1.398(3)   |
| C(12)-H(12)  | 0.9500     |
| C(1)-H(1)    | 0.9500     |
| C(17)-H(17A) | 0.9800     |
| C(17)-H(17B) | 0.9800     |
| C(17)-H(17C) | 0.9800     |
| C(14)-C(13)  | 1.381(3)   |
| C(14)-H(14)  | 0.9500     |
| C(13)-H(13)  | 0.9500     |
| P(1S)-F(2S)  | 1.5982(12) |
| P(1S)-F(5S)  | 1.6007(11) |
| P(1S)-F(6S)  | 1.6053(11) |
| P(1S)-F(4S)  | 1.6053(11) |
| P(1S)-F(1S)  | 1.6057(12) |
| P(1S)-F(3S)  | 1.6066(11) |
| C(1S)-O(1S)  | 1.416(3)   |
| C(1S)-C(2SB) | 1.465(13)  |
| C(1S)-C(2S)  | 1.497(3)   |
| C(1S)-O(1SB) | 1.530(12)  |
| C(1S)-H(1S1) | 0.9900     |
| C(1S)-H(1S2) | 0.9900     |
| C(4S)-O(1SB) | 1.347(12)  |
| C(4S)-O(1S)  | 1.453(3)   |
| C(4S)-C(3SB) | 1.57(5)    |

|                 |           |
|-----------------|-----------|
| C(4S)-C(3S)     | 1.504(10) |
| C(4S)-H(4S1)    | 0.9900    |
| C(4S)-H(4S2)    | 0.9900    |
| C(2S)-C(3S)     | 1.522(10) |
| C(2S)-H(2S1)    | 0.9900    |
| C(2S)-H(2S2)    | 0.9900    |
| C(3S)-H(3S1)    | 0.9900    |
| C(3S)-H(3S2)    | 0.9900    |
| C(2SB)-C(3SB)   | 1.62(4)   |
| C(2SB)-H(2S3)   | 0.9900    |
| C(2SB)-H(2S4)   | 0.9900    |
| C(3SB)-H(3S3)   | 0.9900    |
| C(3SB)-H(3S4)   | 0.9900    |
|                 |           |
| C(7)-Fe(1)-C(6) | 95.77(7)  |
| C(7)-Fe(1)-C(1) | 155.99(7) |
| C(6)-Fe(1)-C(1) | 102.44(7) |
| C(7)-Fe(1)-C(4) | 92.44(7)  |
| C(6)-Fe(1)-C(4) | 111.88(7) |
| C(1)-Fe(1)-C(4) | 66.38(7)  |
| C(7)-Fe(1)-C(3) | 90.57(7)  |
| C(6)-Fe(1)-C(3) | 151.30(7) |
| C(1)-Fe(1)-C(3) | 66.04(7)  |
| C(4)-Fe(1)-C(3) | 39.70(6)  |
| C(7)-Fe(1)-C(5) | 126.83(7) |
| C(6)-Fe(1)-C(5) | 88.18(7)  |
| C(1)-Fe(1)-C(5) | 39.80(7)  |
| C(4)-Fe(1)-C(5) | 39.12(7)  |
| C(3)-Fe(1)-C(5) | 65.97(7)  |
| C(7)-Fe(1)-C(2) | 122.89(7) |
| C(6)-Fe(1)-C(2) | 141.06(7) |
| C(1)-Fe(1)-C(2) | 39.33(7)  |
| C(4)-Fe(1)-C(2) | 66.00(6)  |
| C(3)-Fe(1)-C(2) | 38.95(6)  |
| C(5)-Fe(1)-C(2) | 65.98(7)  |
| C(7)-Fe(1)-P(1) | 95.75(5)  |

|                   |            |
|-------------------|------------|
| C(6)-Fe(1)-P(1)   | 92.28(5)   |
| C(1)-Fe(1)-P(1)   | 98.99(5)   |
| C(4)-Fe(1)-P(1)   | 153.56(5)  |
| C(3)-Fe(1)-P(1)   | 114.95(5)  |
| C(5)-Fe(1)-P(1)   | 137.17(5)  |
| C(2)-Fe(1)-P(1)   | 88.58(4)   |
| N(2)-P(1)-N(3)    | 116.39(7)  |
| N(2)-P(1)-N(1)    | 93.42(6)   |
| N(3)-P(1)-N(1)    | 93.04(7)   |
| N(2)-P(1)-Fe(1)   | 115.53(5)  |
| N(3)-P(1)-Fe(1)   | 113.34(5)  |
| N(1)-P(1)-Fe(1)   | 122.13(4)  |
| C(21)-N(1)-C(11)  | 119.82(12) |
| C(21)-N(1)-P(1)   | 110.24(10) |
| C(11)-N(1)-P(1)   | 109.59(10) |
| C(26)-N(2)-C(27)  | 120.20(12) |
| C(26)-N(2)-P(1)   | 112.14(10) |
| C(27)-N(2)-P(1)   | 126.85(11) |
| C(16)-N(3)-C(17)  | 121.98(13) |
| C(16)-N(3)-P(1)   | 111.23(11) |
| C(17)-N(3)-P(1)   | 124.84(11) |
| C(15)-C(16)-C(11) | 120.47(15) |
| C(15)-C(16)-N(3)  | 127.03(16) |
| C(11)-C(16)-N(3)  | 112.50(13) |
| C(25)-C(26)-C(21) | 121.00(15) |
| C(25)-C(26)-N(2)  | 126.42(15) |
| C(21)-C(26)-N(2)  | 112.57(12) |
| C(22)-C(21)-C(26) | 121.03(15) |
| C(22)-C(21)-N(1)  | 127.54(15) |
| C(26)-C(21)-N(1)  | 111.43(13) |
| O(2)-C(7)-Fe(1)   | 176.91(14) |
| C(12)-C(11)-C(16) | 121.63(15) |
| C(12)-C(11)-N(1)  | 126.89(16) |
| C(16)-C(11)-N(1)  | 111.46(13) |
| C(5)-C(4)-C(3)    | 107.71(15) |
| C(5)-C(4)-Fe(1)   | 70.49(9)   |

|                     |            |
|---------------------|------------|
| C(3)-C(4)-Fe(1)     | 70.21(9)   |
| C(5)-C(4)-H(4)      | 126.1      |
| C(3)-C(4)-H(4)      | 126.1      |
| Fe(1)-C(4)-H(4)     | 124.8      |
| C(16)-C(15)-C(14)   | 117.78(19) |
| C(16)-C(15)-H(15)   | 121.1      |
| C(14)-C(15)-H(15)   | 121.1      |
| C(4)-C(5)-C(1)      | 108.22(15) |
| C(4)-C(5)-Fe(1)     | 70.38(9)   |
| C(1)-C(5)-Fe(1)     | 69.92(9)   |
| C(4)-C(5)-H(5)      | 125.9      |
| C(1)-C(5)-H(5)      | 125.9      |
| Fe(1)-C(5)-H(5)     | 125.4      |
| C(26)-C(25)-C(24)   | 117.91(17) |
| C(26)-C(25)-H(25)   | 121.0      |
| C(24)-C(25)-H(25)   | 121.0      |
| C(2)-C(3)-C(4)      | 108.17(15) |
| C(2)-C(3)-Fe(1)     | 70.82(9)   |
| C(4)-C(3)-Fe(1)     | 70.09(9)   |
| C(2)-C(3)-H(3)      | 125.9      |
| C(4)-C(3)-H(3)      | 125.9      |
| Fe(1)-C(3)-H(3)     | 124.8      |
| C(24)-C(23)-C(22)   | 121.03(16) |
| C(24)-C(23)-H(23)   | 119.5      |
| C(22)-C(23)-H(23)   | 119.5      |
| O(1)-C(6)-Fe(1)     | 178.07(15) |
| N(2)-C(27)-H(27A)   | 109.5      |
| N(2)-C(27)-H(27B)   | 109.5      |
| H(27A)-C(27)-H(27B) | 109.5      |
| N(2)-C(27)-H(27C)   | 109.5      |
| H(27A)-C(27)-H(27C) | 109.5      |
| H(27B)-C(27)-H(27C) | 109.5      |
| C(21)-C(22)-C(23)   | 117.90(17) |
| C(21)-C(22)-H(22)   | 121.0      |
| C(23)-C(22)-H(22)   | 121.0      |
| C(3)-C(2)-C(1)      | 108.46(14) |



|                     |            |
|---------------------|------------|
| C(3)-C(2)-Fe(1)     | 70.23(9)   |
| C(1)-C(2)-Fe(1)     | 69.85(9)   |
| C(3)-C(2)-H(2)      | 125.8      |
| C(1)-C(2)-H(2)      | 125.8      |
| Fe(1)-C(2)-H(2)     | 125.7      |
| C(23)-C(24)-C(25)   | 121.13(16) |
| C(23)-C(24)-H(24)   | 119.4      |
| C(25)-C(24)-H(24)   | 119.4      |
| C(11)-C(12)-C(13)   | 117.54(19) |
| C(11)-C(12)-H(12)   | 121.2      |
| C(13)-C(12)-H(12)   | 121.2      |
| C(2)-C(1)-C(5)      | 107.42(15) |
| C(2)-C(1)-Fe(1)     | 70.82(9)   |
| C(5)-C(1)-Fe(1)     | 70.29(9)   |
| C(2)-C(1)-H(1)      | 126.3      |
| C(5)-C(1)-H(1)      | 126.3      |
| Fe(1)-C(1)-H(1)     | 124.2      |
| N(3)-C(17)-H(17A)   | 109.5      |
| N(3)-C(17)-H(17B)   | 109.5      |
| H(17A)-C(17)-H(17B) | 109.5      |
| N(3)-C(17)-H(17C)   | 109.5      |
| H(17A)-C(17)-H(17C) | 109.5      |
| H(17B)-C(17)-H(17C) | 109.5      |
| C(13)-C(14)-C(15)   | 121.41(17) |
| C(13)-C(14)-H(14)   | 119.3      |
| C(15)-C(14)-H(14)   | 119.3      |
| C(14)-C(13)-C(12)   | 121.05(17) |
| C(14)-C(13)-H(13)   | 119.5      |
| C(12)-C(13)-H(13)   | 119.5      |
| F(2S)-P(1S)-F(5S)   | 90.45(7)   |
| F(2S)-P(1S)-F(6S)   | 179.48(7)  |
| F(5S)-P(1S)-F(6S)   | 89.92(6)   |
| F(2S)-P(1S)-F(4S)   | 89.96(7)   |
| F(5S)-P(1S)-F(4S)   | 90.40(6)   |
| F(6S)-P(1S)-F(4S)   | 89.67(6)   |
| F(2S)-P(1S)-F(1S)   | 90.03(7)   |

|                     |           |
|---------------------|-----------|
| F(5S)-P(1S)-F(1S)   | 179.52(7) |
| F(6S)-P(1S)-F(1S)   | 89.60(6)  |
| F(4S)-P(1S)-F(1S)   | 89.57(7)  |
| F(2S)-P(1S)-F(3S)   | 90.25(7)  |
| F(5S)-P(1S)-F(3S)   | 89.75(6)  |
| F(6S)-P(1S)-F(3S)   | 90.12(6)  |
| F(4S)-P(1S)-F(3S)   | 179.74(8) |
| F(1S)-P(1S)-F(3S)   | 90.28(7)  |
| O(1S)-C(1S)-C(2S)   | 108.8(2)  |
| C(2SB)-C(1S)-O(1SB) | 106.1(7)  |
| O(1S)-C(1S)-H(1S1)  | 109.9     |
| C(2S)-C(1S)-H(1S1)  | 109.9     |
| O(1S)-C(1S)-H(1S2)  | 109.9     |
| C(2S)-C(1S)-H(1S2)  | 109.9     |
| H(1S1)-C(1S)-H(1S2) | 108.3     |
| O(1SB)-C(4S)-C(3SB) | 109.8(17) |
| O(1S)-C(4S)-C(3S)   | 105.2(4)  |
| O(1S)-C(4S)-H(4S1)  | 110.7     |
| C(3S)-C(4S)-H(4S1)  | 110.7     |
| O(1S)-C(4S)-H(4S2)  | 110.7     |
| C(3S)-C(4S)-H(4S2)  | 110.7     |
| H(4S1)-C(4S)-H(4S2) | 108.8     |
| C(1S)-O(1S)-C(4S)   | 108.8(2)  |
| C(1S)-C(2S)-C(3S)   | 102.4(4)  |
| C(1S)-C(2S)-H(2S1)  | 111.3     |
| C(3S)-C(2S)-H(2S1)  | 111.3     |
| C(1S)-C(2S)-H(2S2)  | 111.3     |
| C(3S)-C(2S)-H(2S2)  | 111.3     |
| H(2S1)-C(2S)-H(2S2) | 109.2     |
| C(4S)-C(3S)-C(2S)   | 103.1(5)  |
| C(4S)-C(3S)-H(3S1)  | 111.2     |
| C(2S)-C(3S)-H(3S1)  | 111.2     |
| C(4S)-C(3S)-H(3S2)  | 111.2     |
| C(2S)-C(3S)-H(3S2)  | 111.2     |
| H(3S1)-C(3S)-H(3S2) | 109.1     |
| C(4S)-O(1SB)-C(1S)  | 108.2(8)  |

|                      |           |
|----------------------|-----------|
| C(1S)-C(2SB)-C(3SB)  | 108.1(19) |
| C(1S)-C(2SB)-H(2S3)  | 110.1     |
| C(3SB)-C(2SB)-H(2S3) | 110.1     |
| C(1S)-C(2SB)-H(2S4)  | 110.1     |
| C(3SB)-C(2SB)-H(2S4) | 110.1     |
| H(2S3)-C(2SB)-H(2S4) | 108.4     |
| C(4S)-C(3SB)-C(2SB)  | 97(2)     |
| C(4S)-C(3SB)-H(3S3)  | 112.3     |
| C(2SB)-C(3SB)-H(3S3) | 112.3     |
| C(4S)-C(3SB)-H(3S4)  | 112.3     |
| C(2SB)-C(3SB)-H(3S4) | 112.3     |
| H(3S3)-C(3SB)-H(3S4) | 109.9     |

---

Symmetry transformations used to generate equivalent atoms:

**Table S4.** Anisotropic displacement parameters ( $\text{\AA}^2 \times 10^3$ ) for 2a. The anisotropic displacement factor exponent takes the form:  $-2\pi^2 [ h^2 a^{*2} U^{11} + \dots + 2 h k a^* b^* U^{12} ]$

|       | U <sup>11</sup> | U <sup>22</sup> | U <sup>33</sup> | U <sup>23</sup> | U <sup>13</sup> | U <sup>12</sup> |
|-------|-----------------|-----------------|-----------------|-----------------|-----------------|-----------------|
| Fe(1) | 24(1)           | 17(1)           | 13(1)           | 1(1)            | 6(1)            | 2(1)            |
| P(1)  | 21(1)           | 17(1)           | 13(1)           | 1(1)            | 5(1)            | -1(1)           |
| O(2)  | 30(1)           | 38(1)           | 29(1)           | 7(1)            | 8(1)            | 9(1)            |
| N(1)  | 23(1)           | 20(1)           | 15(1)           | -1(1)           | 5(1)            | 2(1)            |
| O(1)  | 45(1)           | 28(1)           | 36(1)           | 3(1)            | 7(1)            | -11(1)          |
| N(2)  | 24(1)           | 22(1)           | 16(1)           | 4(1)            | 8(1)            | 0(1)            |
| N(3)  | 24(1)           | 20(1)           | 20(1)           | 0(1)            | 5(1)            | -4(1)           |
| C(16) | 36(1)           | 19(1)           | 14(1)           | 0(1)            | 7(1)            | -2(1)           |
| C(26) | 23(1)           | 24(1)           | 15(1)           | -3(1)           | 6(1)            | -5(1)           |
| C(21) | 24(1)           | 26(1)           | 14(1)           | -4(1)           | 5(1)            | -2(1)           |
| C(7)  | 30(1)           | 24(1)           | 21(1)           | 2(1)            | 10(1)           | 3(1)            |
| C(11) | 34(1)           | 19(1)           | 13(1)           | 1(1)            | 7(1)            | 2(1)            |
| C(4)  | 40(1)           | 27(1)           | 17(1)           | -1(1)           | 12(1)           | 5(1)            |
| C(15) | 50(1)           | 22(1)           | 18(1)           | 0(1)            | 12(1)           | -7(1)           |
| C(5)  | 40(1)           | 31(1)           | 14(1)           | -1(1)           | 4(1)            | -3(1)           |
| C(25) | 33(1)           | 32(1)           | 19(1)           | -2(1)           | 11(1)           | -10(1)          |
| C(3)  | 34(1)           | 28(1)           | 17(1)           | 3(1)            | 10(1)           | -1(1)           |
| C(23) | 23(1)           | 51(1)           | 29(1)           | -11(1)          | 11(1)           | -4(1)           |
| C(6)  | 32(1)           | 22(1)           | 20(1)           | 0(1)            | 5(1)            | -1(1)           |
| C(27) | 34(1)           | 27(1)           | 21(1)           | 9(1)            | 8(1)            | 3(1)            |
| C(22) | 23(1)           | 38(1)           | 23(1)           | -8(1)           | 4(1)            | 2(1)            |
| C(2)  | 42(1)           | 22(1)           | 15(1)           | 4(1)            | 10(1)           | 5(1)            |
| C(24) | 32(1)           | 47(1)           | 26(1)           | -8(1)           | 15(1)           | -12(1)          |
| C(12) | 47(1)           | 27(1)           | 18(1)           | 3(1)            | 9(1)            | 11(1)           |
| C(1)  | 31(1)           | 36(1)           | 17(1)           | 7(1)            | 6(1)            | 7(1)            |
| C(17) | 25(1)           | 30(1)           | 30(1)           | 1(1)            | 6(1)            | -7(1)           |
| C(14) | 74(1)           | 18(1)           | 21(1)           | 1(1)            | 16(1)           | -3(1)           |
| C(13) | 68(1)           | 22(1)           | 23(1)           | 5(1)            | 15(1)           | 12(1)           |
| P(1S) | 26(1)           | 21(1)           | 19(1)           | -1(1)           | 7(1)            | 0(1)            |
| F(6S) | 38(1)           | 38(1)           | 20(1)           | -4(1)           | 8(1)            | -2(1)           |
| F(5S) | 31(1)           | 24(1)           | 35(1)           | 1(1)            | 6(1)            | -4(1)           |

|        |       |        |       |        |       |        |
|--------|-------|--------|-------|--------|-------|--------|
| F(4S)  | 29(1) | 35(1)  | 38(1) | -4(1)  | 10(1) | 7(1)   |
| F(3S)  | 36(1) | 28(1)  | 39(1) | 2(1)   | 10(1) | 10(1)  |
| F(2S)  | 47(1) | 48(1)  | 19(1) | -2(1)  | 8(1)  | 3(1)   |
| F(1S)  | 46(1) | 31(1)  | 43(1) | -1(1)  | 19(1) | -12(1) |
| C(1S)  | 38(1) | 39(1)  | 39(1) | -13(1) | 14(1) | -9(1)  |
| C(4S)  | 40(1) | 33(1)  | 26(1) | -1(1)  | 2(1)  | 0(1)   |
| O(1S)  | 31(1) | 47(2)  | 45(1) | -23(1) | 15(1) | -8(1)  |
| C(2S)  | 38(1) | 33(1)  | 35(1) | -12(1) | 17(1) | -10(1) |
| C(3S)  | 38(2) | 39(2)  | 35(3) | -12(2) | 18(2) | -4(2)  |
| O(1SB) | 41(4) | 58(7)  | 37(5) | -17(5) | 5(4)  | 3(5)   |
| C(2SB) | 35(4) | 55(9)  | 36(5) | -17(5) | 12(4) | -18(5) |
| C(3SB) | 45(6) | 49(12) | 28(7) | -22(7) | 9(7)  | -11(7) |

---

Compound **1b**•Fp<sup>+</sup>:

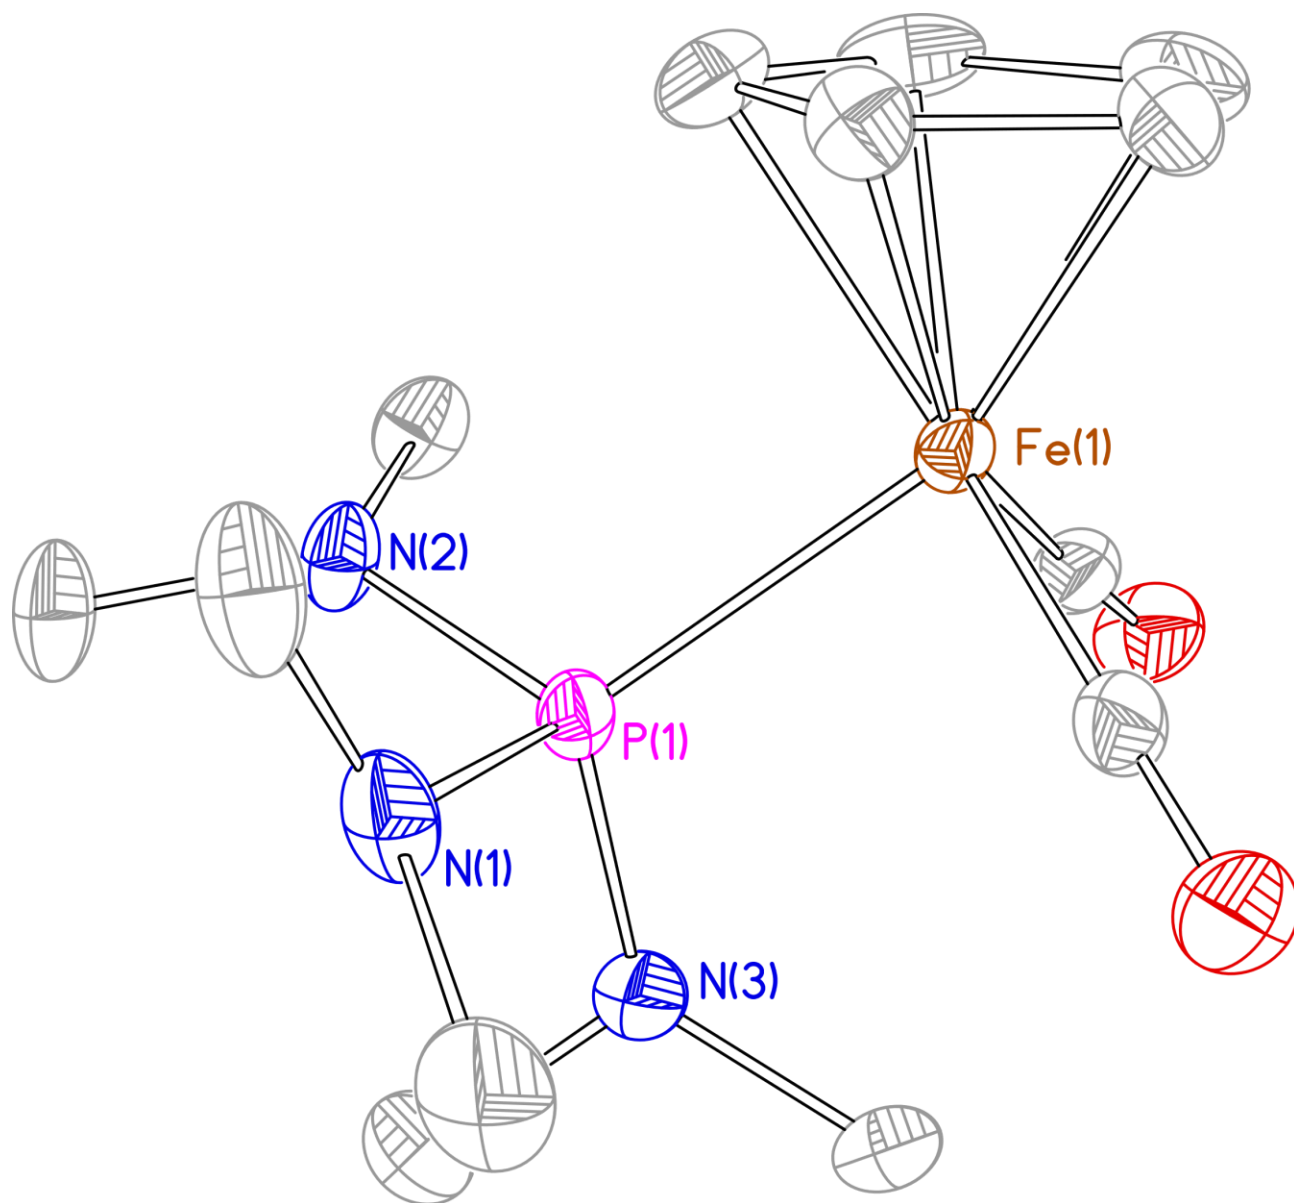

**Table S5.** Crystal data and structure refinement for **1b**•Fp<sup>+</sup>.

|                                   |                                             |                 |
|-----------------------------------|---------------------------------------------|-----------------|
| Identification code               | fppnme2_7                                   |                 |
| Empirical formula                 | C13 H23 F6 Fe N3 O2 P2                      |                 |
| Formula weight                    | 485.13                                      |                 |
| Temperature                       | 100(2) K                                    |                 |
| Wavelength                        | 0.71073 Å                                   |                 |
| Crystal system                    | Monoclinic                                  |                 |
| Space group                       | P2 <sub>1</sub> /c                          |                 |
| Unit cell dimensions              | a = 13.0704(6) Å                            | α = 90°.        |
|                                   | b = 19.2166(9) Å                            | β = 90.417(2)°. |
|                                   | c = 15.4820(7) Å                            | γ = 90°.        |
| Volume                            | 3888.5(3) Å <sup>3</sup>                    |                 |
| Z                                 | 8                                           |                 |
| Density (calculated)              | 1.657 Mg/m <sup>3</sup>                     |                 |
| Absorption coefficient            | 1.009 mm <sup>-1</sup>                      |                 |
| F(000)                            | 1984                                        |                 |
| Crystal size                      | 0.230 x 0.130 x 0.030 mm <sup>3</sup>       |                 |
| Theta range for data collection   | 2.292 to 33.204°.                           |                 |
| Index ranges                      | -20 ≤ h ≤ 20, -29 ≤ k ≤ 29, -23 ≤ l ≤ 23    |                 |
| Reflections collected             | 429575                                      |                 |
| Independent reflections           | 14863 [R(int) = 0.0462]                     |                 |
| Completeness to theta = 25.242°   | 99.9 %                                      |                 |
| Absorption correction             | Semi-empirical from equivalents             |                 |
| Max. and min. transmission        | .7465 and .6786                             |                 |
| Refinement method                 | Full-matrix least-squares on F <sup>2</sup> |                 |
| Data / restraints / parameters    | 14863 / 0 / 499                             |                 |
| Goodness-of-fit on F <sup>2</sup> | 1.026                                       |                 |
| Final R indices [I > 2σ(I)]       | R1 = 0.0424, wR2 = 0.1162                   |                 |
| R indices (all data)              | R1 = 0.0519, wR2 = 0.1253                   |                 |
| Extinction coefficient            | n/a                                         |                 |
| Largest diff. peak and hole       | 1.971 and -1.354 e.Å <sup>-3</sup>          |                 |

**Table S6.** Atomic coordinates ( $\times 10^4$ ) and equivalent isotropic displacement parameters ( $\text{\AA}^2 \times 10^3$ ) for 2b.  $U(\text{eq})$  is defined as one third of the trace of the orthogonalized  $U^{ij}$  tensor.

|        | x        | y       | z        | $U(\text{eq})$ |
|--------|----------|---------|----------|----------------|
| Fe(1)  | 2667(1)  | 5656(1) | 4332(1)  | 16(1)          |
| Fe(2)  | 2408(1)  | 4170(1) | -94(1)   | 17(1)          |
| P(2)   | 3006(1)  | 3453(1) | -1103(1) | 17(1)          |
| P(3)   | 4984(1)  | 5828(1) | 7382(1)  | 22(1)          |
| P(1)   | 2104(1)  | 6754(1) | 4419(1)  | 18(1)          |
| P(4)   | 43(1)    | 4245(1) | 2341(1)  | 22(1)          |
| F(31)  | 6199(1)  | 5840(1) | 7288(1)  | 34(1)          |
| F(32)  | 3762(1)  | 5804(1) | 7479(1)  | 40(1)          |
| F(33)  | 5082(1)  | 6139(1) | 8344(1)  | 45(1)          |
| F(41)  | -94(1)   | 4679(1) | 1464(1)  | 37(1)          |
| F(34)  | 4899(1)  | 6602(1) | 7014(1)  | 51(1)          |
| F(42)  | -1156(1) | 4088(1) | 2337(1)  | 45(1)          |
| F(43)  | 1241(1)  | 4403(1) | 2344(1)  | 45(1)          |
| F(44)  | 178(1)   | 3827(1) | 3231(1)  | 48(1)          |
| F(45)  | -159(1)  | 4938(1) | 2884(1)  | 46(1)          |
| F(35)  | 5060(1)  | 5067(1) | 7786(1)  | 44(1)          |
| F(36)  | 4874(1)  | 5522(1) | 6432(1)  | 53(1)          |
| O(11)  | 4800(1)  | 6073(1) | 4530(1)  | 32(1)          |
| O(12)  | 2569(2)  | 5760(1) | 2455(1)  | 41(1)          |
| O(21)  | 271(1)   | 3910(1) | -501(1)  | 39(1)          |
| F(46)  | 254(2)   | 3561(1) | 1793(1)  | 60(1)          |
| N(11)  | 970(1)   | 6907(1) | 3946(1)  | 28(1)          |
| N(12)  | 1867(1)  | 7002(1) | 5424(1)  | 22(1)          |
| N(13)  | 2912(2)  | 7336(1) | 4002(1)  | 29(1)          |
| N(21)  | 4203(1)  | 3168(1) | -971(1)  | 26(1)          |
| N(22)  | 3061(1)  | 3808(1) | -2075(1) | 25(1)          |
| O(22)  | 2675(2)  | 3105(1) | 1231(1)  | 48(1)          |
| N(23)  | 2293(1)  | 2731(1) | -1193(1) | 30(1)          |
| C(21)  | 3313(1)  | 4992(1) | -570(1)  | 22(1)          |
| C(11)  | 2199(2)  | 4609(1) | 4230(1)  | 26(1)          |
| C(122) | 2635(1)  | 6868(1) | 6095(1)  | 26(1)          |



|        |         |         |          |       |
|--------|---------|---------|----------|-------|
| C(12)  | 1374(1) | 5023(1) | 4544(1)  | 24(1) |
| C(22)  | 2286(2) | 5218(1) | -470(1)  | 26(1) |
| C(15)  | 3017(2) | 4663(1) | 4821(2)  | 31(1) |
| C(23)  | 2037(2) | 5149(1) | 430(1)   | 28(1) |
| C(25)  | 3683(1) | 4774(1) | 248(1)   | 24(1) |
| C(121) | 1126(2) | 7531(1) | 5679(1)  | 32(1) |
| C(111) | 61(2)   | 6540(1) | 4232(2)  | 36(1) |
| C(13)  | 1690(2) | 5326(1) | 5337(1)  | 27(1) |
| C(14)  | 2703(2) | 5113(1) | 5510(1)  | 32(1) |
| C(131) | 3636(2) | 7228(1) | 3299(1)  | 31(1) |
| C(16)  | 2606(2) | 5719(1) | 3186(1)  | 26(1) |
| C(26)  | 1114(1) | 3998(1) | -345(1)  | 26(1) |
| C(221) | 2217(2) | 4241(1) | -2389(1) | 35(1) |
| C(132) | 2707(2) | 8079(1) | 4140(2)  | 45(1) |
| C(24)  | 2899(2) | 4879(1) | 864(1)   | 27(1) |
| C(17)  | 3961(1) | 5922(1) | 4444(1)  | 23(1) |
| C(231) | 1708(2) | 2388(1) | -520(2)  | 32(1) |
| C(112) | 941(2)  | 7058(2) | 3013(1)  | 46(1) |
| C(27)  | 2562(2) | 3511(1) | 705(1)   | 31(1) |
| C(211) | 4393(2) | 2588(1) | -375(2)  | 41(1) |
| C(212) | 5068(2) | 3640(1) | -1012(2) | 34(1) |
| C(222) | 3765(2) | 3610(2) | -2756(1) | 40(1) |
| C(232) | 2518(3) | 2256(2) | -1905(2) | 66(1) |

---

**Table S7.** Bond lengths [ $\text{\AA}$ ] and angles [ $^\circ$ ] for 2b.

---

|             |            |
|-------------|------------|
| Fe(1)-C(17) | 1.7739(19) |
| Fe(1)-C(16) | 1.7792(18) |
| Fe(1)-C(14) | 2.1022(18) |
| Fe(1)-C(15) | 2.1026(19) |
| Fe(1)-C(11) | 2.1086(19) |
| Fe(1)-C(12) | 2.1108(18) |
| Fe(1)-C(13) | 2.1177(18) |
| Fe(1)-P(1)  | 2.2381(5)  |
| Fe(2)-C(26) | 1.7640(19) |
| Fe(2)-C(27) | 1.781(2)   |
| Fe(2)-C(25) | 2.0957(18) |
| Fe(2)-C(22) | 2.1015(18) |
| Fe(2)-C(23) | 2.1060(19) |
| Fe(2)-C(21) | 2.1089(17) |
| Fe(2)-C(24) | 2.1092(19) |
| Fe(2)-P(2)  | 2.2305(5)  |
| P(2)-N(22)  | 1.6538(16) |
| P(2)-N(21)  | 1.6676(16) |
| P(2)-N(23)  | 1.6766(17) |
| P(3)-F(36)  | 1.5897(16) |
| P(3)-F(35)  | 1.5946(15) |
| P(3)-F(31)  | 1.5961(13) |
| P(3)-F(34)  | 1.5963(16) |
| P(3)-F(32)  | 1.6064(13) |
| P(3)-F(33)  | 1.6078(15) |
| P(1)-N(12)  | 1.6592(15) |
| P(1)-N(13)  | 1.6715(18) |
| P(1)-N(11)  | 1.6742(16) |
| P(4)-F(46)  | 1.5903(17) |
| P(4)-F(43)  | 1.5954(14) |
| P(4)-F(42)  | 1.5957(14) |
| P(4)-F(45)  | 1.5970(15) |
| P(4)-F(41)  | 1.6014(14) |
| P(4)-F(44)  | 1.6035(14) |

|               |          |
|---------------|----------|
| O(11)-C(17)   | 1.141(2) |
| O(12)-C(16)   | 1.135(2) |
| O(21)-C(26)   | 1.139(2) |
| N(11)-C(111)  | 1.455(3) |
| N(11)-C(112)  | 1.473(3) |
| N(12)-C(121)  | 1.460(2) |
| N(12)-C(122)  | 1.462(2) |
| N(13)-C(131)  | 1.462(3) |
| N(13)-C(132)  | 1.470(3) |
| N(21)-C(212)  | 1.451(3) |
| N(21)-C(211)  | 1.467(3) |
| N(22)-C(222)  | 1.456(3) |
| N(22)-C(221)  | 1.461(3) |
| O(22)-C(27)   | 1.137(3) |
| N(23)-C(231)  | 1.455(3) |
| N(23)-C(232)  | 1.463(3) |
| C(21)-C(25)   | 1.415(3) |
| C(21)-C(22)   | 1.420(3) |
| C(21)-H(21)   | 0.9500   |
| C(11)-C(15)   | 1.406(3) |
| C(11)-C(12)   | 1.428(3) |
| C(11)-H(11)   | 0.9500   |
| C(122)-H(12A) | 0.9800   |
| C(122)-H(12B) | 0.9800   |
| C(122)-H(12C) | 0.9800   |
| C(12)-C(13)   | 1.417(3) |
| C(12)-H(12)   | 0.9500   |
| C(22)-C(23)   | 1.439(3) |
| C(22)-H(22)   | 0.9500   |
| C(15)-C(14)   | 1.436(3) |
| C(15)-H(15)   | 0.9500   |
| C(23)-C(24)   | 1.407(3) |
| C(23)-H(23)   | 0.9500   |
| C(25)-C(24)   | 1.420(3) |
| C(25)-H(25)   | 0.9500   |
| C(121)-H(12D) | 0.9800   |

|               |          |
|---------------|----------|
| C(121)-H(12E) | 0.9800   |
| C(121)-H(12F) | 0.9800   |
| C(111)-H(11A) | 0.9800   |
| C(111)-H(11B) | 0.9800   |
| C(111)-H(11C) | 0.9800   |
| C(13)-C(14)   | 1.410(3) |
| C(13)-H(13)   | 0.9500   |
| C(14)-H(14)   | 0.9500   |
| C(131)-H(13A) | 0.9800   |
| C(131)-H(13B) | 0.9800   |
| C(131)-H(13C) | 0.9800   |
| C(221)-H(22A) | 0.9800   |
| C(221)-H(22B) | 0.9800   |
| C(221)-H(22C) | 0.9800   |
| C(132)-H(13D) | 0.9800   |
| C(132)-H(13E) | 0.9800   |
| C(132)-H(13F) | 0.9800   |
| C(24)-H(24)   | 0.9500   |
| C(231)-H(23A) | 0.9800   |
| C(231)-H(23B) | 0.9800   |
| C(231)-H(23C) | 0.9800   |
| C(112)-H(11D) | 0.9800   |
| C(112)-H(11E) | 0.9800   |
| C(112)-H(11F) | 0.9800   |
| C(211)-H(21A) | 0.9800   |
| C(211)-H(21B) | 0.9800   |
| C(211)-H(21C) | 0.9800   |
| C(212)-H(21D) | 0.9800   |
| C(212)-H(21E) | 0.9800   |
| C(212)-H(21F) | 0.9800   |
| C(222)-H(22D) | 0.9800   |
| C(222)-H(22E) | 0.9800   |
| C(222)-H(22F) | 0.9800   |
| C(232)-H(23D) | 0.9800   |
| C(232)-H(23E) | 0.9800   |
| C(232)-H(23F) | 0.9800   |

|                   |           |
|-------------------|-----------|
| C(17)-Fe(1)-C(16) | 96.58(9)  |
| C(17)-Fe(1)-C(14) | 92.43(8)  |
| C(16)-Fe(1)-C(14) | 154.10(9) |
| C(17)-Fe(1)-C(15) | 91.20(8)  |
| C(16)-Fe(1)-C(15) | 115.40(9) |
| C(14)-Fe(1)-C(15) | 39.94(10) |
| C(17)-Fe(1)-C(11) | 123.90(8) |
| C(16)-Fe(1)-C(11) | 88.83(8)  |
| C(14)-Fe(1)-C(11) | 66.14(8)  |
| C(15)-Fe(1)-C(11) | 39.00(8)  |
| C(17)-Fe(1)-C(12) | 156.16(8) |
| C(16)-Fe(1)-C(12) | 99.44(9)  |
| C(14)-Fe(1)-C(12) | 65.88(8)  |
| C(15)-Fe(1)-C(12) | 65.97(8)  |
| C(11)-Fe(1)-C(12) | 39.57(7)  |
| C(17)-Fe(1)-C(13) | 126.42(8) |
| C(16)-Fe(1)-C(13) | 136.87(9) |
| C(14)-Fe(1)-C(13) | 39.03(8)  |
| C(15)-Fe(1)-C(13) | 66.05(9)  |
| C(11)-Fe(1)-C(13) | 65.96(8)  |
| C(12)-Fe(1)-C(13) | 39.17(7)  |
| C(17)-Fe(1)-P(1)  | 92.14(6)  |
| C(16)-Fe(1)-P(1)  | 89.05(6)  |
| C(14)-Fe(1)-P(1)  | 114.89(7) |
| C(15)-Fe(1)-P(1)  | 154.75(7) |
| C(11)-Fe(1)-P(1)  | 143.90(6) |
| C(12)-Fe(1)-P(1)  | 105.62(5) |
| C(13)-Fe(1)-P(1)  | 92.14(6)  |
| C(26)-Fe(2)-C(27) | 97.06(10) |
| C(26)-Fe(2)-C(25) | 156.82(8) |
| C(27)-Fe(2)-C(25) | 97.66(9)  |
| C(26)-Fe(2)-C(22) | 92.77(8)  |
| C(27)-Fe(2)-C(22) | 151.89(9) |
| C(25)-Fe(2)-C(22) | 66.29(7)  |
| C(26)-Fe(2)-C(23) | 91.70(8)  |

|                   |            |
|-------------------|------------|
| C(27)-Fe(2)-C(23) | 113.17(9)  |
| C(25)-Fe(2)-C(23) | 66.03(8)   |
| C(22)-Fe(2)-C(23) | 40.00(8)   |
| C(26)-Fe(2)-C(21) | 127.06(8)  |
| C(27)-Fe(2)-C(21) | 135.60(9)  |
| C(25)-Fe(2)-C(21) | 39.32(7)   |
| C(22)-Fe(2)-C(21) | 39.41(8)   |
| C(23)-Fe(2)-C(21) | 66.25(8)   |
| C(26)-Fe(2)-C(24) | 124.24(9)  |
| C(27)-Fe(2)-C(24) | 86.51(9)   |
| C(25)-Fe(2)-C(24) | 39.48(7)   |
| C(22)-Fe(2)-C(24) | 66.32(8)   |
| C(23)-Fe(2)-C(24) | 39.00(8)   |
| C(21)-Fe(2)-C(24) | 66.04(7)   |
| C(26)-Fe(2)-P(2)  | 94.00(7)   |
| C(27)-Fe(2)-P(2)  | 90.47(7)   |
| C(25)-Fe(2)-P(2)  | 103.68(5)  |
| C(22)-Fe(2)-P(2)  | 115.11(6)  |
| C(23)-Fe(2)-P(2)  | 154.80(6)  |
| C(21)-Fe(2)-P(2)  | 91.00(5)   |
| C(24)-Fe(2)-P(2)  | 141.73(6)  |
| N(22)-P(2)-N(21)  | 101.59(8)  |
| N(22)-P(2)-N(23)  | 107.09(9)  |
| N(21)-P(2)-N(23)  | 105.03(9)  |
| N(22)-P(2)-Fe(2)  | 113.54(6)  |
| N(21)-P(2)-Fe(2)  | 116.74(6)  |
| N(23)-P(2)-Fe(2)  | 111.83(6)  |
| F(36)-P(3)-F(35)  | 91.64(11)  |
| F(36)-P(3)-F(31)  | 90.25(8)   |
| F(35)-P(3)-F(31)  | 89.41(8)   |
| F(36)-P(3)-F(34)  | 90.49(11)  |
| F(35)-P(3)-F(34)  | 177.77(11) |
| F(31)-P(3)-F(34)  | 91.24(8)   |
| F(36)-P(3)-F(32)  | 89.50(9)   |
| F(35)-P(3)-F(32)  | 89.70(8)   |
| F(31)-P(3)-F(32)  | 179.07(9)  |

|                     |            |
|---------------------|------------|
| F(34)-P(3)-F(32)    | 89.65(9)   |
| F(36)-P(3)-F(33)    | 179.33(9)  |
| F(35)-P(3)-F(33)    | 88.41(9)   |
| F(31)-P(3)-F(33)    | 90.42(8)   |
| F(34)-P(3)-F(33)    | 89.45(10)  |
| F(32)-P(3)-F(33)    | 89.83(8)   |
| N(12)-P(1)-N(13)    | 107.03(9)  |
| N(12)-P(1)-N(11)    | 100.92(8)  |
| N(13)-P(1)-N(11)    | 105.85(10) |
| N(12)-P(1)-Fe(1)    | 113.01(6)  |
| N(13)-P(1)-Fe(1)    | 113.44(6)  |
| N(11)-P(1)-Fe(1)    | 115.48(7)  |
| F(46)-P(4)-F(43)    | 89.12(11)  |
| F(46)-P(4)-F(42)    | 90.93(11)  |
| F(43)-P(4)-F(42)    | 179.90(11) |
| F(46)-P(4)-F(45)    | 179.20(12) |
| F(43)-P(4)-F(45)    | 90.30(10)  |
| F(42)-P(4)-F(45)    | 89.66(10)  |
| F(46)-P(4)-F(41)    | 89.80(10)  |
| F(43)-P(4)-F(41)    | 90.39(8)   |
| F(42)-P(4)-F(41)    | 89.52(8)   |
| F(45)-P(4)-F(41)    | 89.66(9)   |
| F(46)-P(4)-F(44)    | 91.50(11)  |
| F(43)-P(4)-F(44)    | 89.49(8)   |
| F(42)-P(4)-F(44)    | 90.60(8)   |
| F(45)-P(4)-F(44)    | 89.03(10)  |
| F(41)-P(4)-F(44)    | 178.69(10) |
| C(111)-N(11)-C(112) | 112.30(19) |
| C(111)-N(11)-P(1)   | 120.22(14) |
| C(112)-N(11)-P(1)   | 118.70(16) |
| C(121)-N(12)-C(122) | 112.57(14) |
| C(121)-N(12)-P(1)   | 125.59(13) |
| C(122)-N(12)-P(1)   | 118.93(12) |
| C(131)-N(13)-C(132) | 111.40(18) |
| C(131)-N(13)-P(1)   | 127.42(14) |
| C(132)-N(13)-P(1)   | 118.55(16) |

|                      |            |
|----------------------|------------|
| C(212)-N(21)-C(211)  | 111.91(18) |
| C(212)-N(21)-P(2)    | 121.36(14) |
| C(211)-N(21)-P(2)    | 118.75(14) |
| C(222)-N(22)-C(221)  | 112.77(17) |
| C(222)-N(22)-P(2)    | 125.64(16) |
| C(221)-N(22)-P(2)    | 120.01(13) |
| C(231)-N(23)-C(232)  | 111.48(18) |
| C(231)-N(23)-P(2)    | 127.61(14) |
| C(232)-N(23)-P(2)    | 117.65(15) |
| C(25)-C(21)-C(22)    | 108.12(16) |
| C(25)-C(21)-Fe(2)    | 69.84(10)  |
| C(22)-C(21)-Fe(2)    | 70.01(10)  |
| C(25)-C(21)-H(21)    | 125.9      |
| C(22)-C(21)-H(21)    | 125.9      |
| Fe(2)-C(21)-H(21)    | 125.8      |
| C(15)-C(11)-C(12)    | 108.10(18) |
| C(15)-C(11)-Fe(1)    | 70.27(11)  |
| C(12)-C(11)-Fe(1)    | 70.30(11)  |
| C(15)-C(11)-H(11)    | 126.0      |
| C(12)-C(11)-H(11)    | 126.0      |
| Fe(1)-C(11)-H(11)    | 125.1      |
| N(12)-C(122)-H(12A)  | 109.5      |
| N(12)-C(122)-H(12B)  | 109.5      |
| H(12A)-C(122)-H(12B) | 109.5      |
| N(12)-C(122)-H(12C)  | 109.5      |
| H(12A)-C(122)-H(12C) | 109.5      |
| H(12B)-C(122)-H(12C) | 109.5      |
| C(13)-C(12)-C(11)    | 107.88(16) |
| C(13)-C(12)-Fe(1)    | 70.68(10)  |
| C(11)-C(12)-Fe(1)    | 70.14(11)  |
| C(13)-C(12)-H(12)    | 126.1      |
| C(11)-C(12)-H(12)    | 126.1      |
| Fe(1)-C(12)-H(12)    | 124.7      |
| C(21)-C(22)-C(23)    | 107.35(16) |
| C(21)-C(22)-Fe(2)    | 70.57(10)  |
| C(23)-C(22)-Fe(2)    | 70.17(11)  |



|                      |            |
|----------------------|------------|
| C(21)-C(22)-H(22)    | 126.3      |
| C(23)-C(22)-H(22)    | 126.3      |
| Fe(2)-C(22)-H(22)    | 124.6      |
| C(11)-C(15)-C(14)    | 107.91(17) |
| C(11)-C(15)-Fe(1)    | 70.73(11)  |
| C(14)-C(15)-Fe(1)    | 70.02(11)  |
| C(11)-C(15)-H(15)    | 126.0      |
| C(14)-C(15)-H(15)    | 126.0      |
| Fe(1)-C(15)-H(15)    | 124.8      |
| C(24)-C(23)-C(22)    | 108.05(17) |
| C(24)-C(23)-Fe(2)    | 70.63(11)  |
| C(22)-C(23)-Fe(2)    | 69.83(10)  |
| C(24)-C(23)-H(23)    | 126.0      |
| C(22)-C(23)-H(23)    | 126.0      |
| Fe(2)-C(23)-H(23)    | 125.2      |
| C(21)-C(25)-C(24)    | 108.33(17) |
| C(21)-C(25)-Fe(2)    | 70.84(10)  |
| C(24)-C(25)-Fe(2)    | 70.77(11)  |
| C(21)-C(25)-H(25)    | 125.8      |
| C(24)-C(25)-H(25)    | 125.8      |
| Fe(2)-C(25)-H(25)    | 124.2      |
| N(12)-C(121)-H(12D)  | 109.5      |
| N(12)-C(121)-H(12E)  | 109.5      |
| H(12D)-C(121)-H(12E) | 109.5      |
| N(12)-C(121)-H(12F)  | 109.5      |
| H(12D)-C(121)-H(12F) | 109.5      |
| H(12E)-C(121)-H(12F) | 109.5      |
| N(11)-C(111)-H(11A)  | 109.5      |
| N(11)-C(111)-H(11B)  | 109.5      |
| H(11A)-C(111)-H(11B) | 109.5      |
| N(11)-C(111)-H(11C)  | 109.5      |
| H(11A)-C(111)-H(11C) | 109.5      |
| H(11B)-C(111)-H(11C) | 109.5      |
| C(14)-C(13)-C(12)    | 108.25(18) |
| C(14)-C(13)-Fe(1)    | 69.89(11)  |
| C(12)-C(13)-Fe(1)    | 70.15(10)  |

|                      |            |
|----------------------|------------|
| C(14)-C(13)-H(13)    | 125.9      |
| C(12)-C(13)-H(13)    | 125.9      |
| Fe(1)-C(13)-H(13)    | 125.7      |
| C(13)-C(14)-C(15)    | 107.86(17) |
| C(13)-C(14)-Fe(1)    | 71.08(11)  |
| C(15)-C(14)-Fe(1)    | 70.05(11)  |
| C(13)-C(14)-H(14)    | 126.1      |
| C(15)-C(14)-H(14)    | 126.1      |
| Fe(1)-C(14)-H(14)    | 124.4      |
| N(13)-C(131)-H(13A)  | 109.5      |
| N(13)-C(131)-H(13B)  | 109.5      |
| H(13A)-C(131)-H(13B) | 109.5      |
| N(13)-C(131)-H(13C)  | 109.5      |
| H(13A)-C(131)-H(13C) | 109.5      |
| H(13B)-C(131)-H(13C) | 109.5      |
| O(12)-C(16)-Fe(1)    | 179.9(3)   |
| O(21)-C(26)-Fe(2)    | 177.67(18) |
| N(22)-C(221)-H(22A)  | 109.5      |
| N(22)-C(221)-H(22B)  | 109.5      |
| H(22A)-C(221)-H(22B) | 109.5      |
| N(22)-C(221)-H(22C)  | 109.5      |
| H(22A)-C(221)-H(22C) | 109.5      |
| H(22B)-C(221)-H(22C) | 109.5      |
| N(13)-C(132)-H(13D)  | 109.5      |
| N(13)-C(132)-H(13E)  | 109.5      |
| H(13D)-C(132)-H(13E) | 109.5      |
| N(13)-C(132)-H(13F)  | 109.5      |
| H(13D)-C(132)-H(13F) | 109.5      |
| H(13E)-C(132)-H(13F) | 109.5      |
| C(23)-C(24)-C(25)    | 108.13(17) |
| C(23)-C(24)-Fe(2)    | 70.38(11)  |
| C(25)-C(24)-Fe(2)    | 69.75(10)  |
| C(23)-C(24)-H(24)    | 125.9      |
| C(25)-C(24)-H(24)    | 125.9      |
| Fe(2)-C(24)-H(24)    | 125.5      |
| O(11)-C(17)-Fe(1)    | 177.85(17) |

|                      |          |
|----------------------|----------|
| N(23)-C(231)-H(23A)  | 109.5    |
| N(23)-C(231)-H(23B)  | 109.5    |
| H(23A)-C(231)-H(23B) | 109.5    |
| N(23)-C(231)-H(23C)  | 109.5    |
| H(23A)-C(231)-H(23C) | 109.5    |
| H(23B)-C(231)-H(23C) | 109.5    |
| N(11)-C(112)-H(11D)  | 109.5    |
| N(11)-C(112)-H(11E)  | 109.5    |
| H(11D)-C(112)-H(11E) | 109.5    |
| N(11)-C(112)-H(11F)  | 109.5    |
| H(11D)-C(112)-H(11F) | 109.5    |
| H(11E)-C(112)-H(11F) | 109.5    |
| O(22)-C(27)-Fe(2)    | 177.9(2) |
| N(21)-C(211)-H(21A)  | 109.5    |
| N(21)-C(211)-H(21B)  | 109.5    |
| H(21A)-C(211)-H(21B) | 109.5    |
| N(21)-C(211)-H(21C)  | 109.5    |
| H(21A)-C(211)-H(21C) | 109.5    |
| H(21B)-C(211)-H(21C) | 109.5    |
| N(21)-C(212)-H(21D)  | 109.5    |
| N(21)-C(212)-H(21E)  | 109.5    |
| H(21D)-C(212)-H(21E) | 109.5    |
| N(21)-C(212)-H(21F)  | 109.5    |
| H(21D)-C(212)-H(21F) | 109.5    |
| H(21E)-C(212)-H(21F) | 109.5    |
| N(22)-C(222)-H(22D)  | 109.5    |
| N(22)-C(222)-H(22E)  | 109.5    |
| H(22D)-C(222)-H(22E) | 109.5    |
| N(22)-C(222)-H(22F)  | 109.5    |
| H(22D)-C(222)-H(22F) | 109.5    |
| H(22E)-C(222)-H(22F) | 109.5    |
| N(23)-C(232)-H(23D)  | 109.5    |
| N(23)-C(232)-H(23E)  | 109.5    |
| H(23D)-C(232)-H(23E) | 109.5    |
| N(23)-C(232)-H(23F)  | 109.5    |
| H(23D)-C(232)-H(23F) | 109.5    |

H(23E)-C(232)-H(23F) 109.5

---

Symmetry transformations used to generate equivalent atoms:

**Table S8.** Anisotropic displacement parameters ( $\text{\AA}^2 \times 10^3$ ) for 2b. The anisotropic displacement factor exponent takes the form:  $-2\pi^2 [ h^2 a^{*2} U^{11} + \dots + 2 h k a^* b^* U^{12} ]$

|        | U <sup>11</sup> | U <sup>22</sup> | U <sup>33</sup> | U <sup>23</sup> | U <sup>13</sup> | U <sup>12</sup> |
|--------|-----------------|-----------------|-----------------|-----------------|-----------------|-----------------|
| Fe(1)  | 16(1)           | 20(1)           | 13(1)           | 1(1)            | 0(1)            | 3(1)            |
| Fe(2)  | 16(1)           | 16(1)           | 18(1)           | 1(1)            | 4(1)            | 0(1)            |
| P(2)   | 18(1)           | 16(1)           | 17(1)           | -1(1)           | 1(1)            | 0(1)            |
| P(3)   | 16(1)           | 29(1)           | 20(1)           | 7(1)            | -1(1)           | -1(1)           |
| P(1)   | 20(1)           | 22(1)           | 13(1)           | -1(1)           | -1(1)           | 6(1)            |
| P(4)   | 17(1)           | 25(1)           | 24(1)           | 3(1)            | -2(1)           | 0(1)            |
| F(31)  | 17(1)           | 45(1)           | 40(1)           | 10(1)           | 2(1)            | -1(1)           |
| F(32)  | 17(1)           | 68(1)           | 35(1)           | 11(1)           | 1(1)            | -1(1)           |
| F(33)  | 39(1)           | 64(1)           | 30(1)           | -10(1)          | -6(1)           | 9(1)            |
| F(41)  | 31(1)           | 54(1)           | 26(1)           | 13(1)           | -4(1)           | -2(1)           |
| F(34)  | 40(1)           | 43(1)           | 70(1)           | 29(1)           | 2(1)            | 6(1)            |
| F(42)  | 21(1)           | 64(1)           | 49(1)           | 19(1)           | -5(1)           | -12(1)          |
| F(43)  | 18(1)           | 77(1)           | 39(1)           | 13(1)           | -4(1)           | -6(1)           |
| F(44)  | 35(1)           | 62(1)           | 47(1)           | 34(1)           | -2(1)           | 4(1)            |
| F(45)  | 59(1)           | 41(1)           | 38(1)           | -13(1)          | -11(1)          | 12(1)           |
| F(35)  | 40(1)           | 33(1)           | 60(1)           | 18(1)           | -1(1)           | -4(1)           |
| F(36)  | 38(1)           | 96(1)           | 26(1)           | -15(1)          | -4(1)           | 4(1)            |
| O(11)  | 20(1)           | 40(1)           | 37(1)           | 7(1)            | 3(1)            | 0(1)            |
| O(12)  | 73(1)           | 33(1)           | 16(1)           | -5(1)           | 2(1)            | 6(1)            |
| O(21)  | 20(1)           | 30(1)           | 65(1)           | 1(1)            | -2(1)           | -4(1)           |
| F(46)  | 68(1)           | 38(1)           | 72(1)           | -19(1)          | -4(1)           | 11(1)           |
| N(11)  | 28(1)           | 35(1)           | 21(1)           | -5(1)           | -9(1)           | 14(1)           |
| N(12)  | 21(1)           | 31(1)           | 16(1)           | -7(1)           | -1(1)           | 5(1)            |
| N(13)  | 38(1)           | 22(1)           | 26(1)           | 2(1)            | 8(1)            | 3(1)            |
| N(21)  | 20(1)           | 27(1)           | 32(1)           | 1(1)            | 4(1)            | 4(1)            |
| N(22)  | 26(1)           | 31(1)           | 17(1)           | 2(1)            | 4(1)            | 0(1)            |
| O(22)  | 71(1)           | 42(1)           | 32(1)           | 15(1)           | 1(1)            | 3(1)            |
| N(23)  | 34(1)           | 23(1)           | 32(1)           | -8(1)           | 9(1)            | -8(1)           |
| C(21)  | 27(1)           | 20(1)           | 20(1)           | 0(1)            | 0(1)            | -8(1)           |
| C(11)  | 29(1)           | 20(1)           | 29(1)           | 0(1)            | 0(1)            | 2(1)            |
| C(122) | 25(1)           | 36(1)           | 15(1)           | -4(1)           | -3(1)           | -1(1)           |

|        |       |       |       |        |        |        |
|--------|-------|-------|-------|--------|--------|--------|
| C(12)  | 19(1) | 26(1) | 28(1) | -1(1)  | -3(1)  | -1(1)  |
| C(22)  | 28(1) | 16(1) | 33(1) | 2(1)   | -10(1) | -2(1)  |
| C(15)  | 23(1) | 29(1) | 41(1) | 16(1)  | -4(1)  | 3(1)   |
| C(23)  | 25(1) | 24(1) | 36(1) | -7(1)  | 3(1)   | 4(1)   |
| C(25)  | 23(1) | 25(1) | 24(1) | -4(1)  | -4(1)  | -1(1)  |
| C(121) | 28(1) | 39(1) | 30(1) | -17(1) | -1(1)  | 9(1)   |
| C(111) | 21(1) | 43(1) | 43(1) | -14(1) | -11(1) | 10(1)  |
| C(13)  | 28(1) | 31(1) | 22(1) | 0(1)   | 6(1)   | -8(1)  |
| C(14)  | 34(1) | 40(1) | 21(1) | 13(1)  | -9(1)  | -13(1) |
| C(131) | 39(1) | 31(1) | 24(1) | 6(1)   | 7(1)   | 0(1)   |
| C(16)  | 38(1) | 22(1) | 18(1) | -2(1)  | 1(1)   | 6(1)   |
| C(26)  | 21(1) | 20(1) | 38(1) | 0(1)   | 3(1)   | -1(1)  |
| C(221) | 41(1) | 43(1) | 20(1) | 4(1)   | -4(1)  | 6(1)   |
| C(132) | 62(2) | 24(1) | 51(1) | 2(1)   | 15(1)  | 6(1)   |
| C(24)  | 33(1) | 28(1) | 21(1) | -6(1)  | 1(1)   | 2(1)   |
| C(17)  | 21(1) | 27(1) | 22(1) | 5(1)   | 3(1)   | 4(1)   |
| C(231) | 28(1) | 23(1) | 44(1) | 1(1)   | 7(1)   | -4(1)  |
| C(112) | 52(1) | 62(2) | 24(1) | -1(1)  | -16(1) | 25(1)  |
| C(27)  | 40(1) | 28(1) | 24(1) | 4(1)   | 6(1)   | 3(1)   |
| C(211) | 30(1) | 40(1) | 53(1) | 15(1)  | 5(1)   | 13(1)  |
| C(212) | 18(1) | 30(1) | 54(1) | -3(1)  | 1(1)   | 0(1)   |
| C(222) | 44(1) | 50(1) | 25(1) | -5(1)  | 13(1)  | -1(1)  |
| C(232) | 80(2) | 50(2) | 69(2) | -39(2) | 41(2)  | -36(2) |

---

Compound **1a<sup>F</sup>·Fp**:

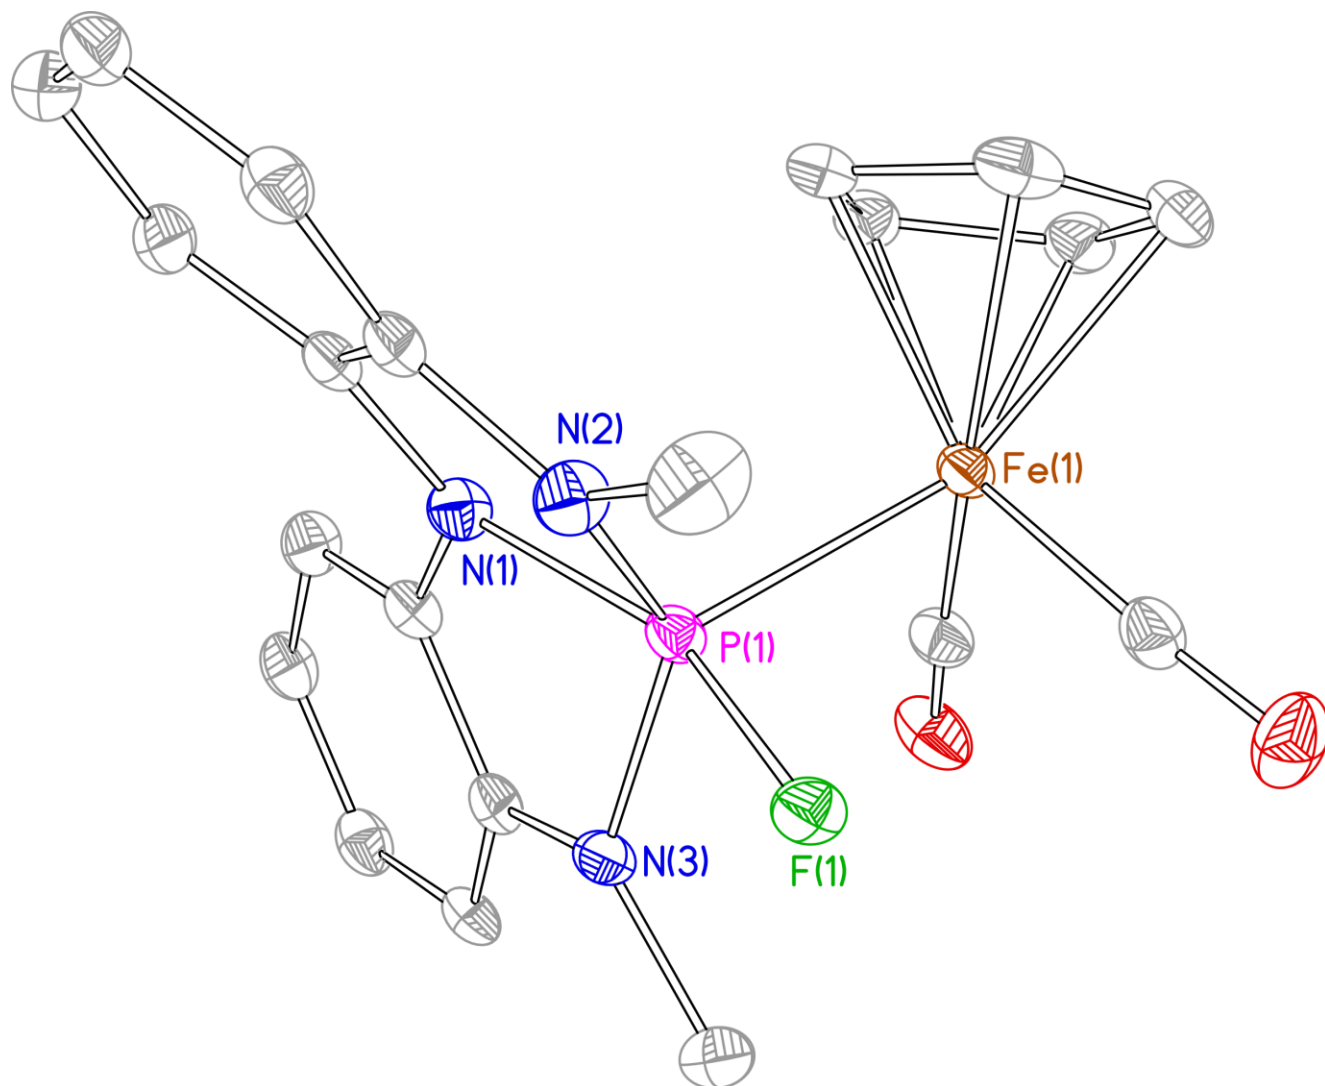

**Table S9.** Crystal data and structure refinement for **1a<sup>F</sup>•Fp**.

|                                   |                                                                                                                                                     |
|-----------------------------------|-----------------------------------------------------------------------------------------------------------------------------------------------------|
| Identification code               | FpNNNPF5x                                                                                                                                           |
| Empirical formula                 | C21 H19 F Fe N3 O2 P                                                                                                                                |
| Formula weight                    | 451.21                                                                                                                                              |
| Temperature                       | 100(2) K                                                                                                                                            |
| Wavelength                        | 0.71073 Å                                                                                                                                           |
| Crystal system                    | Orthorhombic                                                                                                                                        |
| Space group                       | Pca2 <sub>1</sub>                                                                                                                                   |
| Unit cell dimensions              | a = 20.512(2) Å                      α = 90°.<br>b = 7.2560(8) Å                        β = 90°.<br>c = 12.6618(13) Å                      γ = 90°. |
| Volume                            | 1884.5(3) Å <sup>3</sup>                                                                                                                            |
| Z                                 | 4                                                                                                                                                   |
| Density (calculated)              | 1.590 Mg/m <sup>3</sup>                                                                                                                             |
| Absorption coefficient            | 0.919 mm <sup>-1</sup>                                                                                                                              |
| F(000)                            | 928                                                                                                                                                 |
| Crystal size                      | 0.200 x 0.110 x 0.080 mm <sup>3</sup>                                                                                                               |
| Theta range for data collection   | 1.986 to 31.503°.                                                                                                                                   |
| Index ranges                      | -30 ≤ h ≤ 30, -10 ≤ k ≤ 10, -12 ≤ l ≤ 18                                                                                                            |
| Reflections collected             | 65006                                                                                                                                               |
| Independent reflections           | 5534 [R(int) = 0.0617]                                                                                                                              |
| Completeness to theta = 25.242°   | 100.0 %                                                                                                                                             |
| Absorption correction             | Semi-empirical from equivalents                                                                                                                     |
| Max. and min. transmission        | 0.7463 and 0.6680                                                                                                                                   |
| Refinement method                 | Full-matrix least-squares on F <sup>2</sup>                                                                                                         |
| Data / restraints / parameters    | 5534 / 1 / 265                                                                                                                                      |
| Goodness-of-fit on F <sup>2</sup> | 1.076                                                                                                                                               |
| Final R indices [I > 2σ(I)]       | R1 = 0.0359, wR2 = 0.0802                                                                                                                           |
| R indices (all data)              | R1 = 0.0418, wR2 = 0.0826                                                                                                                           |
| Absolute structure parameter      | 0.03(2)                                                                                                                                             |
| Extinction coefficient            | n/a                                                                                                                                                 |
| Largest diff. peak and hole       | 0.592 and -0.446 e.Å <sup>-3</sup>                                                                                                                  |



**Table S10.** Atomic coordinates ( $\times 10^4$ ) and equivalent isotropic displacement parameters ( $\text{\AA}^2 \times 10^3$ ) for 3.  $U(\text{eq})$  is defined as one third of the trace of the orthogonalized  $U^{ij}$  tensor.

|       | x       | y       | z       | $U(\text{eq})$ |
|-------|---------|---------|---------|----------------|
| Fe(1) | 6375(1) | 3610(1) | 3663(1) | 14(1)          |
| P(1)  | 5812(1) | 4860(1) | 5067(1) | 14(1)          |
| F(1)  | 6046(1) | 7049(2) | 4929(2) | 18(1)          |
| O(2)  | 7423(1) | 2377(3) | 5039(2) | 27(1)          |
| O(1)  | 6973(1) | 7139(3) | 3150(2) | 28(1)          |
| N(1)  | 5399(1) | 2902(3) | 5628(2) | 16(1)          |
| N(2)  | 5043(1) | 5611(3) | 4731(2) | 19(1)          |
| N(3)  | 6274(1) | 4836(3) | 6230(2) | 16(1)          |
| C(12) | 4732(1) | 2816(4) | 5455(2) | 15(1)          |
| C(3M) | 6039(2) | 928(4)  | 3348(3) | 21(1)          |
| C(25) | 6600(2) | 766(5)  | 7958(3) | 20(1)          |
| C(11) | 4529(1) | 4403(4) | 4907(2) | 15(1)          |
| C(4M) | 5524(2) | 2188(5) | 3191(3) | 21(1)          |
| C(13) | 4282(2) | 1481(4) | 5751(3) | 19(1)          |
| C(16) | 3879(1) | 4627(4) | 4640(3) | 18(1)          |
| C(22) | 5756(1) | 1989(4) | 6400(2) | 16(1)          |
| C(24) | 6094(2) | -344(4) | 7621(3) | 19(1)          |
| C(26) | 6701(1) | 2507(4) | 7504(2) | 17(1)          |
| C(21) | 6268(1) | 3136(4) | 6739(2) | 16(1)          |
| C(5M) | 5710(2) | 3440(5) | 2397(3) | 24(1)          |
| C(23) | 5672(2) | 244(4)  | 6825(3) | 18(1)          |
| C(15) | 3428(2) | 3259(4) | 4918(3) | 21(1)          |
| C(2)  | 7001(2) | 2886(4) | 4519(3) | 19(1)          |
| C(14) | 3625(2) | 1729(5) | 5474(3) | 22(1)          |
| C(1)  | 6727(2) | 5776(4) | 3377(3) | 19(1)          |
| C(2M) | 6550(2) | 1378(5) | 2624(3) | 23(1)          |
| C(27) | 6828(2) | 6034(5) | 6459(3) | 21(1)          |
| C(17) | 4924(2) | 7199(5) | 4036(3) | 28(1)          |
| C(1M) | 6346(2) | 2923(5) | 2044(3) | 26(1)          |

**Table 11.** Bond lengths [ $\text{\AA}$ ] and angles [ $^\circ$ ] for **3**.

---

|             |            |
|-------------|------------|
| Fe(1)-C(2)  | 1.761(3)   |
| Fe(1)-C(1)  | 1.767(3)   |
| Fe(1)-C(3M) | 2.103(3)   |
| Fe(1)-C(5M) | 2.109(3)   |
| Fe(1)-C(1M) | 2.112(3)   |
| Fe(1)-C(4M) | 2.114(3)   |
| Fe(1)-C(2M) | 2.118(3)   |
| Fe(1)-P(1)  | 2.3047(9)  |
| P(1)-F(1)   | 1.6687(18) |
| P(1)-N(2)   | 1.723(3)   |
| P(1)-N(3)   | 1.750(3)   |
| P(1)-N(1)   | 1.800(3)   |
| O(2)-C(2)   | 1.147(4)   |
| O(1)-C(1)   | 1.146(4)   |
| N(1)-C(12)  | 1.388(4)   |
| N(1)-C(22)  | 1.389(4)   |
| N(2)-C(11)  | 1.389(4)   |
| N(2)-C(17)  | 1.471(4)   |
| N(3)-C(21)  | 1.392(4)   |
| N(3)-C(27)  | 1.460(4)   |
| C(12)-C(13) | 1.389(4)   |
| C(12)-C(11) | 1.407(4)   |
| C(3M)-C(4M) | 1.411(5)   |
| C(3M)-C(2M) | 1.431(5)   |
| C(3M)-H(3M) | 0.9500     |
| C(25)-C(24) | 1.381(5)   |
| C(25)-C(26) | 1.403(4)   |
| C(25)-H(25) | 0.9500     |
| C(11)-C(16) | 1.385(4)   |
| C(4M)-C(5M) | 1.407(5)   |
| C(4M)-H(4M) | 0.9500     |
| C(13)-C(14) | 1.405(4)   |
| C(13)-H(13) | 0.9500     |
| C(16)-C(15) | 1.402(4)   |

|                   |            |
|-------------------|------------|
| C(16)-H(16)       | 0.9500     |
| C(22)-C(23)       | 1.386(4)   |
| C(22)-C(21)       | 1.406(4)   |
| C(24)-C(23)       | 1.396(4)   |
| C(24)-H(24)       | 0.9500     |
| C(26)-C(21)       | 1.392(4)   |
| C(26)-H(26)       | 0.9500     |
| C(5M)-C(1M)       | 1.430(5)   |
| C(5M)-H(5M)       | 0.9500     |
| C(23)-H(23)       | 0.9500     |
| C(15)-C(14)       | 1.376(5)   |
| C(15)-H(15)       | 0.9500     |
| C(14)-H(14)       | 0.9500     |
| C(2M)-C(1M)       | 1.404(5)   |
| C(2M)-H(2M)       | 0.9500     |
| C(27)-H(27A)      | 0.9800     |
| C(27)-H(27B)      | 0.9800     |
| C(27)-H(27C)      | 0.9800     |
| C(17)-H(17A)      | 0.9800     |
| C(17)-H(17B)      | 0.9800     |
| C(17)-H(17C)      | 0.9800     |
| C(1M)-H(1M)       | 0.9500     |
|                   |            |
| C(2)-Fe(1)-C(1)   | 95.37(15)  |
| C(2)-Fe(1)-C(3M)  | 94.57(14)  |
| C(1)-Fe(1)-C(3M)  | 156.64(14) |
| C(2)-Fe(1)-C(5M)  | 157.27(14) |
| C(1)-Fe(1)-C(5M)  | 99.23(14)  |
| C(3M)-Fe(1)-C(5M) | 65.76(13)  |
| C(2)-Fe(1)-C(1M)  | 123.22(15) |
| C(1)-Fe(1)-C(1M)  | 91.26(14)  |
| C(3M)-Fe(1)-C(1M) | 65.67(13)  |
| C(5M)-Fe(1)-C(1M) | 39.60(14)  |
| C(2)-Fe(1)-C(4M)  | 129.12(14) |
| C(1)-Fe(1)-C(4M)  | 135.50(14) |
| C(3M)-Fe(1)-C(4M) | 39.10(13)  |

|                   |            |
|-------------------|------------|
| C(5M)-Fe(1)-C(4M) | 38.91(14)  |
| C(1M)-Fe(1)-C(4M) | 65.57(13)  |
| C(2)-Fe(1)-C(2M)  | 91.76(14)  |
| C(1)-Fe(1)-C(2M)  | 118.90(14) |
| C(3M)-Fe(1)-C(2M) | 39.63(13)  |
| C(5M)-Fe(1)-C(2M) | 65.93(14)  |
| C(1M)-Fe(1)-C(2M) | 38.78(14)  |
| C(4M)-Fe(1)-C(2M) | 65.82(13)  |
| C(2)-Fe(1)-P(1)   | 90.47(11)  |
| C(1)-Fe(1)-P(1)   | 90.75(10)  |
| C(3M)-Fe(1)-P(1)  | 110.26(9)  |
| C(5M)-Fe(1)-P(1)  | 106.58(10) |
| C(1M)-Fe(1)-P(1)  | 145.87(11) |
| C(4M)-Fe(1)-P(1)  | 89.84(9)   |
| C(2M)-Fe(1)-P(1)  | 149.88(10) |
| F(1)-P(1)-N(2)    | 86.33(11)  |
| F(1)-P(1)-N(3)    | 86.69(11)  |
| N(2)-P(1)-N(3)    | 134.91(13) |
| F(1)-P(1)-N(1)    | 158.11(12) |
| N(2)-P(1)-N(1)    | 85.18(12)  |
| N(3)-P(1)-N(1)    | 85.12(12)  |
| F(1)-P(1)-Fe(1)   | 98.61(7)   |
| N(2)-P(1)-Fe(1)   | 113.12(10) |
| N(3)-P(1)-Fe(1)   | 111.96(9)  |
| N(1)-P(1)-Fe(1)   | 103.28(9)  |
| C(12)-N(1)-C(22)  | 127.5(3)   |
| C(12)-N(1)-P(1)   | 116.0(2)   |
| C(22)-N(1)-P(1)   | 113.9(2)   |
| C(11)-N(2)-C(17)  | 117.7(3)   |
| C(11)-N(2)-P(1)   | 117.1(2)   |
| C(17)-N(2)-P(1)   | 123.2(2)   |
| C(21)-N(3)-C(27)  | 116.3(3)   |
| C(21)-N(3)-P(1)   | 113.2(2)   |
| C(27)-N(3)-P(1)   | 125.6(2)   |
| N(1)-C(12)-C(13)  | 130.1(3)   |
| N(1)-C(12)-C(11)  | 109.4(2)   |

|                   |           |
|-------------------|-----------|
| C(13)-C(12)-C(11) | 120.5(3)  |
| C(4M)-C(3M)-C(2M) | 108.0(3)  |
| C(4M)-C(3M)-Fe(1) | 70.87(18) |
| C(2M)-C(3M)-Fe(1) | 70.73(18) |
| C(4M)-C(3M)-H(3M) | 126.0     |
| C(2M)-C(3M)-H(3M) | 126.0     |
| Fe(1)-C(3M)-H(3M) | 124.0     |
| C(24)-C(25)-C(26) | 120.7(3)  |
| C(24)-C(25)-H(25) | 119.7     |
| C(26)-C(25)-H(25) | 119.7     |
| C(16)-C(11)-N(2)  | 128.1(3)  |
| C(16)-C(11)-C(12) | 120.0(3)  |
| N(2)-C(11)-C(12)  | 111.8(2)  |
| C(5M)-C(4M)-C(3M) | 108.5(3)  |
| C(5M)-C(4M)-Fe(1) | 70.34(19) |
| C(3M)-C(4M)-Fe(1) | 70.04(18) |
| C(5M)-C(4M)-H(4M) | 125.8     |
| C(3M)-C(4M)-H(4M) | 125.8     |
| Fe(1)-C(4M)-H(4M) | 125.5     |
| C(12)-C(13)-C(14) | 118.7(3)  |
| C(12)-C(13)-H(13) | 120.6     |
| C(14)-C(13)-H(13) | 120.6     |
| C(11)-C(16)-C(15) | 119.4(3)  |
| C(11)-C(16)-H(16) | 120.3     |
| C(15)-C(16)-H(16) | 120.3     |
| C(23)-C(22)-N(1)  | 130.0(3)  |
| C(23)-C(22)-C(21) | 121.0(3)  |
| N(1)-C(22)-C(21)  | 109.0(3)  |
| C(25)-C(24)-C(23) | 120.7(3)  |
| C(25)-C(24)-H(24) | 119.6     |
| C(23)-C(24)-H(24) | 119.6     |
| C(21)-C(26)-C(25) | 119.1(3)  |
| C(21)-C(26)-H(26) | 120.5     |
| C(25)-C(26)-H(26) | 120.5     |
| C(26)-C(21)-N(3)  | 127.4(3)  |
| C(26)-C(21)-C(22) | 119.7(3)  |

|                     |           |
|---------------------|-----------|
| N(3)-C(21)-C(22)    | 113.0(3)  |
| C(4M)-C(5M)-C(1M)   | 107.6(3)  |
| C(4M)-C(5M)-Fe(1)   | 70.75(19) |
| C(1M)-C(5M)-Fe(1)   | 70.31(19) |
| C(4M)-C(5M)-H(5M)   | 126.2     |
| C(1M)-C(5M)-H(5M)   | 126.2     |
| Fe(1)-C(5M)-H(5M)   | 124.3     |
| C(22)-C(23)-C(24)   | 118.8(3)  |
| C(22)-C(23)-H(23)   | 120.6     |
| C(24)-C(23)-H(23)   | 120.6     |
| C(14)-C(15)-C(16)   | 120.4(3)  |
| C(14)-C(15)-H(15)   | 119.8     |
| C(16)-C(15)-H(15)   | 119.8     |
| O(2)-C(2)-Fe(1)     | 176.9(3)  |
| C(15)-C(14)-C(13)   | 120.9(3)  |
| C(15)-C(14)-H(14)   | 119.6     |
| C(13)-C(14)-H(14)   | 119.6     |
| O(1)-C(1)-Fe(1)     | 176.5(3)  |
| C(1M)-C(2M)-C(3M)   | 107.4(3)  |
| C(1M)-C(2M)-Fe(1)   | 70.4(2)   |
| C(3M)-C(2M)-Fe(1)   | 69.64(18) |
| C(1M)-C(2M)-H(2M)   | 126.3     |
| C(3M)-C(2M)-H(2M)   | 126.3     |
| Fe(1)-C(2M)-H(2M)   | 125.3     |
| N(3)-C(27)-H(27A)   | 109.5     |
| N(3)-C(27)-H(27B)   | 109.5     |
| H(27A)-C(27)-H(27B) | 109.5     |
| N(3)-C(27)-H(27C)   | 109.5     |
| H(27A)-C(27)-H(27C) | 109.5     |
| H(27B)-C(27)-H(27C) | 109.5     |
| N(2)-C(17)-H(17A)   | 109.5     |
| N(2)-C(17)-H(17B)   | 109.5     |
| H(17A)-C(17)-H(17B) | 109.5     |
| N(2)-C(17)-H(17C)   | 109.5     |
| H(17A)-C(17)-H(17C) | 109.5     |
| H(17B)-C(17)-H(17C) | 109.5     |

|                   |          |
|-------------------|----------|
| C(2M)-C(1M)-C(5M) | 108.5(3) |
| C(2M)-C(1M)-Fe(1) | 70.8(2)  |
| C(5M)-C(1M)-Fe(1) | 70.1(2)  |
| C(2M)-C(1M)-H(1M) | 125.8    |
| C(5M)-C(1M)-H(1M) | 125.8    |
| Fe(1)-C(1M)-H(1M) | 124.9    |

---

Symmetry transformations used to generate equivalent atoms:

**Table S12.** Anisotropic displacement parameters ( $\text{\AA}^2 \times 10^3$ ) for 3. The anisotropic displacement factor exponent takes the form:  $-2\pi^2 [ h^2 a^{*2} U^{11} + \dots + 2 h k a^* b^* U^{12} ]$

|       | U <sup>11</sup> | U <sup>22</sup> | U <sup>33</sup> | U <sup>23</sup> | U <sup>13</sup> | U <sup>12</sup> |
|-------|-----------------|-----------------|-----------------|-----------------|-----------------|-----------------|
| Fe(1) | 19(1)           | 13(1)           | 11(1)           | 0(1)            | -1(1)           | -1(1)           |
| P(1)  | 18(1)           | 12(1)           | 11(1)           | 0(1)            | -1(1)           | -1(1)           |
| F(1)  | 25(1)           | 12(1)           | 18(1)           | 1(1)            | -1(1)           | -1(1)           |
| O(2)  | 26(1)           | 35(1)           | 18(1)           | -4(1)           | -3(1)           | 10(1)           |
| O(1)  | 32(1)           | 18(1)           | 36(2)           | 1(1)            | 10(1)           | -3(1)           |
| N(1)  | 19(1)           | 15(1)           | 14(1)           | 3(1)            | -2(1)           | 0(1)            |
| N(2)  | 20(1)           | 16(1)           | 19(1)           | 3(1)            | -2(1)           | 0(1)            |
| N(3)  | 20(1)           | 15(1)           | 12(1)           | -2(1)           | -1(1)           | -1(1)           |
| C(12) | 19(1)           | 17(1)           | 10(1)           | -1(1)           | 1(1)            | 0(1)            |
| C(3M) | 30(2)           | 16(1)           | 17(1)           | -1(1)           | -1(1)           | -6(1)           |
| C(25) | 20(1)           | 26(2)           | 14(1)           | 2(1)            | 0(1)            | 5(1)            |
| C(11) | 19(1)           | 16(1)           | 10(1)           | 0(1)            | 1(1)            | 1(1)            |
| C(4M) | 22(1)           | 26(2)           | 15(2)           | -6(1)           | -2(1)           | -5(1)           |
| C(13) | 21(1)           | 22(1)           | 15(1)           | 3(1)            | 1(1)            | -2(1)           |
| C(16) | 20(1)           | 21(1)           | 14(1)           | 1(1)            | 0(1)            | 2(1)            |
| C(22) | 19(1)           | 18(1)           | 12(1)           | -1(1)           | 0(1)            | 1(1)            |
| C(24) | 25(1)           | 19(1)           | 15(1)           | 4(1)            | 1(1)            | 3(1)            |
| C(26) | 21(1)           | 21(1)           | 11(1)           | -1(1)           | -1(1)           | 2(1)            |
| C(21) | 19(1)           | 17(1)           | 11(1)           | 1(1)            | 1(1)            | 1(1)            |
| C(5M) | 30(2)           | 24(2)           | 19(2)           | -3(1)           | -9(1)           | -1(1)           |
| C(23) | 21(1)           | 17(1)           | 18(1)           | 3(1)            | 1(1)            | 1(1)            |
| C(15) | 18(1)           | 28(2)           | 15(2)           | -1(1)           | 0(1)            | 0(1)            |
| C(2)  | 22(1)           | 18(1)           | 17(2)           | -4(1)           | 1(1)            | 1(1)            |
| C(14) | 20(1)           | 27(2)           | 18(2)           | 0(1)            | 1(1)            | -4(1)           |
| C(1)  | 22(1)           | 19(1)           | 16(1)           | -2(1)           | 3(1)            | 2(1)            |
| C(2M) | 24(1)           | 22(2)           | 22(2)           | -9(1)           | 2(1)            | -2(1)           |
| C(27) | 21(1)           | 21(1)           | 22(2)           | -3(1)           | -3(1)           | -3(1)           |
| C(17) | 28(2)           | 22(2)           | 34(2)           | 12(1)           | -7(1)           | 1(1)            |
| C(1M) | 36(2)           | 28(2)           | 12(2)           | -2(1)           | 1(1)            | -9(1)           |



## IV. DFT Calculations

### A. General Computational Information

Geometries were optimized in Orca 4.0.0<sup>8</sup> using the M06-L<sup>9</sup> density functional with the def2-TZVP basis set.<sup>10</sup> Functional choice was based on a survey of several functionals and comparing optimized geometries with experimental crystallographic structures, specifically with regards to metrics involving the Fe and P local environment (See **Table S13** below). Its accuracy for reproducing bond lengths in **1a<sup>F</sup>•Fp** in comparison to other functionals led to its usage. Calculations were carried out in the gas phase without symmetry constraint unless otherwise noted. Stationary points were characterized by frequency calculations to confirm their identity as local minima (zero imaginary frequencies). Natural bond order (NBO) analysis was performed with the NBO 6.0 program<sup>11</sup> through Orca. NLMOs were visualized using the Jmol software.<sup>12</sup>

**Table S13.** Collected bond metrics for the phosphorus and iron local environments with different functionals for **1a•Fp<sup>+</sup>** and **1a<sup>F</sup>•Fp** in comparison with experimental crystallographic data.

#### **1a•Fp<sup>+</sup>:**

| Functional        | d(P-Fe) | d(P-N <sub>mid</sub> ) | d(P-N <sub>side,mean</sub> ) | d(Fe-(CO) <sub>mean</sub> ) | ∠(N <sub>2</sub> -P-N <sub>3</sub> ) |
|-------------------|---------|------------------------|------------------------------|-----------------------------|--------------------------------------|
| X-Ray Diffraction | 2.181   | 1.713                  | 1.675                        | 1.789                       | 116.4                                |
| BP86              | 2.226   | 1.719                  | 1.699                        | 1.769                       | 118.5                                |
| TPSS              | 2.232   | 1.716                  | 1.694                        | 1.781                       | 118.8                                |
| PBE               | 2.219   | 1.718                  | 1.698                        | 1.766                       | 118.5                                |
| B97D              | 2.197   | 1.711                  | 1.691                        | 1.772                       | 118.4                                |
| M06L              | 2.205   | 1.705                  | 1.682                        | 1.788                       | 117.5                                |

#### **1a<sup>F</sup>•Fp:**

| Functional        | d(P-Fe) | d(P-N <sub>mid</sub> ) | d(P-N <sub>side,mean</sub> ) | d(Fe-(CO) <sub>mean</sub> ) | d(P-F) |
|-------------------|---------|------------------------|------------------------------|-----------------------------|--------|
| X-Ray Diffraction | 2.305   | 1.800                  | 1.737                        | 1.764                       | 1.668  |
| BP86              | 2.372   | 1.827                  | 1.754                        | 1.751                       | 1.686  |
| TPSS              | 2.366   | 1.823                  | 1.745                        | 1.763                       | 1.682  |
| PBE               | 2.365   | 1.823                  | 1.753                        | 1.749                       | 1.686  |
| B97D              | 2.348   | 1.822                  | 1.754                        | 1.753                       | 1.676  |
| M06L              | 2.329   | 1.809                  | 1.735                        | 1.761                       | 1.665  |

Energy decomposition analysis (EDA-NOCV)<sup>13</sup> was performed, analyzed, and visualized using a trial version of the ADF modeling suite<sup>14</sup> with the BP86<sup>15</sup> density functional and a frozen core treatment. Fragments were defined as the Fe(Cp)(CO)<sub>2</sub><sup>+</sup> metal center and the appropriate phosphorus ligand.

For topological analysis of the electron density (QTAIM),<sup>16</sup> an all-electron single point calculation was conducted. Coordinates obtained from the above geometry optimization were used as the input, and analysis and visualization of the QTAIM data was performed with the Multiwfn program.<sup>17</sup>

## B. Method for Calculating Fluoride Ion Affinity

Fluoride ion affinities (FIA) were calculated using Christie's method.<sup>18</sup> Briefly, this is done by measuring the enthalpy of reaction for the following reaction, where **A** is the molecule of interest to be studied. A known value for the FIA of CF<sub>2</sub>O (-49.8 kcal/mol) is added to the calculated value to give the final FIA. Solvent corrections (CPCM(CH<sub>2</sub>Cl<sub>2</sub>)) were applied to the calculations to account for charge neutralization.<sup>19</sup>

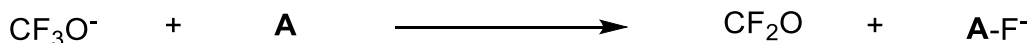

$$\text{FIA} = \Delta H_{\text{rxn}} - 49.8 \text{ kcal/mol}$$

| Compound                       | Computed Total Enthalpy (Eh) | Computed Total Enthalpy (kcal/mol) |
|--------------------------------|------------------------------|------------------------------------|
| CF <sub>2</sub> O              | -313.10169285                | -196474.1302                       |
| CF <sub>3</sub> O <sup>-</sup> | -413.12358904                | -259238.7702                       |
| <b>1a</b> •Fp <sup>+</sup>     | -2731.29635077               | -1713913.042                       |
| <b>1a</b> <sup>F</sup> •Fp     | -2831.33339594               | -1776687.188                       |
| <b>1b</b> •Fp <sup>+</sup>     | -2428.76981290               | -1524074.917                       |
| <b>1b</b> <sup>F</sup> •Fp     | -2528.76475665               | -1586822.644                       |

## C. Cartesian Coordinates for Stationary Points

Cartesian coordinates of the M06-L/def2-TZVP stationary points in Å units and the absolute thermochemical data in Hartrees.

### **1a**•Fp<sup>+</sup>

---

Temperature = 298.150 K

Pressure = 1.0000 Atm

Electronic Energy = -2731.68354853

Total Thermal Energy = -2731.29729498

Enthalpy = -2731.29635077

Free Energy = -2731.37208436

---

|    |                  |                  |                  |
|----|------------------|------------------|------------------|
| Fe | 5.30180233927635 | 7.17809079486311 | 8.13996341584950 |
| P  | 5.79822016423460 | 5.66458672155575 | 6.61621952674889 |
| O  | 3.25888234915385 | 8.60494217447179 | 6.58792662762768 |
| N  | 7.16275696480110 | 4.67315226263149 | 6.84767802700012 |
| O  | 7.59418094633389 | 8.85443714507702 | 7.37935127450114 |
| N  | 6.43490654056998 | 6.33127684972016 | 5.18440943250371 |
| N  | 4.75457812380467 | 4.37156065474302 | 6.47136429150928 |
| C  | 5.43736113554392 | 3.14166321438853 | 6.52146707865113 |
| C  | 7.83700736957748 | 6.21125249497039 | 5.23510968524033 |
| C  | 8.26703892914803 | 5.26082761363313 | 6.17114943429931 |
| C  | 4.07763569037560 | 8.03761071896756 | 7.15881980705511 |
| C  | 6.80834473195583 | 3.30520286152233 | 6.74516515772027 |

|   |                   |                   |                   |
|---|-------------------|-------------------|-------------------|
| C | 4.29174822827166  | 7.63571802109186  | 9.93705545542127  |
| H | 3.61450543031092  | 8.46608762871882  | 10.05874671093913 |
| C | 4.88300812623635  | 1.87904833301205  | 6.40548051032849  |
| H | 3.82218442984896  | 1.75341754501250  | 6.23196396207792  |
| C | 5.68156007845184  | 7.66006606613155  | 10.16002592326031 |
| H | 6.25918302075808  | 8.51294822845344  | 10.48012940015282 |
| C | 8.76333695885702  | 6.94311750526932  | 4.50985788516703  |
| H | 8.44410403673908  | 7.69755881288185  | 3.80262587657508  |
| C | 3.93753791282175  | 6.32411177542930  | 9.49343144854574  |
| H | 2.94374528118126  | 5.98360458277786  | 9.24905905165313  |
| C | 10.53800045575277 | 5.73078036925434  | 5.63278635215050  |
| H | 11.59450126183304 | 5.55419476689211  | 5.78508236425712  |
| C | 6.69383471848915  | 8.19421750891606  | 7.64286208533761  |
| C | 5.80888856822935  | 7.43291103063570  | 4.47105001547702  |
| H | 6.05237853045094  | 8.40762441475779  | 4.90706260158740  |
| H | 4.72927528899561  | 7.29871817744730  | 4.47403591472095  |
| H | 6.13933596565857  | 7.42989740298438  | 3.43388410168421  |
| C | 9.60750947336880  | 5.01245850379076  | 6.38164799173965  |
| H | 9.92322797422774  | 4.28988360707742  | 7.12275996623129  |
| C | 5.11770122307120  | 5.54463438336338  | 9.47263982049157  |
| H | 5.18483615730016  | 4.50499183288072  | 9.18691754512526  |
| C | 10.11690145287316 | 6.68471548596018  | 4.71688460261053  |
| H | 10.85105415002251 | 7.25148847669631  | 4.15865919093357  |
| C | 7.64677746628355  | 2.21153390690201  | 6.83980725889695  |
| H | 8.70758962673446  | 2.34130640617172  | 7.00717665393055  |
| C | 6.20491351982413  | 6.36687263207297  | 9.85386637954023  |
| H | 7.23824372529089  | 6.06368117231086  | 9.91864434105620  |
| C | 3.30187449262724  | 4.43186208133354  | 6.51344739916023  |
| H | 2.86929227733957  | 4.03709930030449  | 5.59423271544574  |
| H | 2.98269798386694  | 5.46604025193568  | 6.62605535195024  |
| H | 2.92437642921099  | 3.85324853131458  | 7.35877048495763  |
| C | 5.73021029658094  | 0.77629876668920  | 6.49973248738885  |
| H | 5.31500292609740  | -0.21875790738011 | 6.40540491932697  |
| C | 7.09264180013227  | 0.93977154531043  | 6.70539091252562  |
| H | 7.73739544748631  | 0.07279534705535  | 6.76800856064663  |

### 1a<sup>F</sup>•Fp

---

Temperature = 298.150 K

Pressure = 1.0000 Atm

Electronic Energy = -2831.72272823

Total Thermal Energy = -2831.33434015

Enthalpy = -2831.33339594

Free Energy = -2831.40603176

---

|    |                   |                  |                   |
|----|-------------------|------------------|-------------------|
| Fe | 5.08663446815943  | 6.93955536002039 | 8.21398825401729  |
| P  | 5.48632782117047  | 5.89852250098078 | 6.16947338780497  |
| O  | 2.23825250396543  | 6.49000982582239 | 7.82391527570712  |
| N  | 6.85980167629974  | 4.76787044060991 | 6.49972090359946  |
| O  | 5.06873676303350  | 9.49970514987651 | 6.83145907914972  |
| N  | 6.61147384155726  | 6.72234835127760 | 5.13653926248371  |
| N  | 4.56122846698555  | 4.45677647520393 | 5.89677551363588  |
| C  | 5.13412280133296  | 3.29421430776186 | 6.39136410261067  |
| C  | 7.94359587711220  | 6.41083951985448 | 5.36559458889863  |
| C  | 8.10067878803850  | 5.26368697793338 | 6.15923997617316  |
| C  | 3.36864975596425  | 6.65963346743285 | 7.94412251794324  |
| C  | 6.48301118528615  | 3.46374223414877 | 6.74107830564912  |
| C  | 5.25510166121675  | 7.43156193711632 | 10.26241709461601 |
| H  | 4.64492893409904  | 8.15792710462590 | 10.77230073323994 |
| C  | 4.51956124955004  | 2.06148230941574 | 6.53774476095556  |
| H  | 3.48228360839509  | 1.92784237717790 | 6.26478168322942  |
| C  | 6.48532552657093  | 7.67868213599394 | 9.60343400063636  |
| H  | 6.96940305450834  | 8.63809490108123 | 9.51149745813522  |
| C  | 9.05103493654572  | 7.09200384103154 | 4.88799762258784  |
| H  | 8.93203913186940  | 7.97244198172633 | 4.27235420241780  |
| C  | 4.97558419589741  | 6.04900573863721 | 10.11842067186847 |
| H  | 4.09980125135754  | 5.54112092433689 | 10.49043003805597 |
| C  | 10.47891962790044 | 5.48803541635962 | 5.97995429624113  |
| H  | 11.47039681018599 | 5.12677629433361 | 6.21691843459934  |
| C  | 5.07425239372396  | 8.47310087522974 | 7.34831198441097  |
| C  | 6.35327178553490  | 7.87173352615979 | 4.28941550959211  |
| H  | 6.75212182048402  | 8.78951962742291 | 4.72986368692356  |
| H  | 5.29476726542331  | 7.99967592329015 | 4.12198899923847  |
| H  | 6.84307185968043  | 7.72573819514659 | 3.32474885916016  |
| C  | 9.37065819899312  | 4.80330072236984 | 6.47117363224109  |
| H  | 9.51020145501929  | 3.92768743224304 | 7.08544169793023  |
| C  | 6.01833460571413  | 5.44894290143798 | 9.37451659793801  |
| H  | 6.08264680879725  | 4.40861480912173 | 9.10088326397565  |
| C  | 10.32202008078112 | 6.61890616098690 | 5.20073785345572  |
| H  | 11.19033939342428 | 7.14603284588526 | 4.82923377716838  |
| C  | 7.21267360401131  | 2.39223459207760 | 7.23289859283048  |
| H  | 8.24929294401956  | 2.50450464917825 | 7.50880008901424  |
| C  | 6.95899692299266  | 6.46435078984638 | 9.05315319633835  |
| H  | 7.86950775075177  | 6.33721043728111 | 8.49102206568141  |
| C  | 3.17214563822960  | 4.36781191327333 | 5.48679231372483  |
| H  | 3.06759429825032  | 3.58646645516943 | 4.73163529344968  |
| H  | 2.83139826758439  | 5.30107526183216 | 5.06522956125284  |

|   |                  |                  |                  |
|---|------------------|------------------|------------------|
| H | 2.52492252432634 | 4.10600901351337 | 6.32845102641028 |
| C | 5.26100951221977 | 0.99042274035149 | 7.02790714720974 |
| H | 4.78651345130076 | 0.02522424017251 | 7.14236269243072 |
| C | 6.59091422086574 | 1.15384629784865 | 7.36747310362552 |
| H | 7.16053217666110 | 0.31563356439115 | 7.74512607997606 |
| F | 4.27103908420865 | 6.74568745301144 | 5.40921081176546 |

### CF<sub>2</sub>O

---

Temperature = 298.150 K  
 Pressure = 1.0000 Atm  
 Electronic Energy = -313.11969618  
 Total Thermal Energy = -313.10263706  
 Enthalpy = -313.10169285  
 Free Energy = -313.13072472

---

|   |                   |                   |                   |
|---|-------------------|-------------------|-------------------|
| C | -0.42133741418179 | 0.47734087977204  | -0.00008835993986 |
| O | -0.48069139616926 | 1.65523975071994  | 0.00004722650399  |
| F | -1.19734196216790 | -0.33105425065643 | 0.68137918112219  |
| F | 0.43162077251896  | -0.24922637983555 | -0.68133804768633 |

### CF<sub>3</sub>O<sup>-</sup>

---

Temperature = 298.150 K  
 Pressure = 1.0000 Atm  
 Electronic Energy = -413.14387409  
 Total Thermal Energy = -413.12453325  
 Enthalpy = -413.12358904  
 Free Energy = -413.15490981

---

|   |                   |                   |                   |
|---|-------------------|-------------------|-------------------|
| C | -2.37812881844211 | -0.22230805235799 | -0.00003185935012 |
| O | -1.15904665023943 | -0.22233590037019 | 0.00000628171387  |
| F | -3.02047900066111 | 0.63715561068676  | 0.91903165323811  |
| F | -3.02063129856707 | -1.44810278914832 | 0.28477572676222  |
| F | -3.02051423209027 | 0.14369113118974  | -1.20378180236408 |

### 1b•Fp<sup>+</sup>

---

Temperature = 298.150 K  
 Pressure = 1.0000 Atm  
 Electronic Energy = -2529.14681029  
 Total Thermal Energy = -2528.76570086  
 Enthalpy = -2528.76475665  
 Free Energy = -2528.84051461

---

|    |                  |                  |                   |
|----|------------------|------------------|-------------------|
| Fe | 3.11607495068511 | 7.97027165640346 | -0.07945805949463 |
| P  | 3.89740201343032 | 6.60853852670720 | -1.74109139250948 |

|   |                  |                   |                   |
|---|------------------|-------------------|-------------------|
| O | 0.30214407097707 | 7.57864537780691  | -0.79909011390107 |
| N | 5.49818351123349 | 6.10179226753124  | -1.56125606904259 |
| N | 3.98647057240838 | 7.35562450001503  | -3.22691266859868 |
| O | 3.39647849368379 | 5.92542788088735  | 2.00475264902199  |
| N | 3.01281051609953 | 5.19522989383665  | -1.87573139618266 |
| C | 4.42540626648898 | 9.47844842066298  | -0.79875681792647 |
| H | 5.01095412300398 | 9.39893714554214  | -1.70123825209770 |
| C | 3.10656674371866 | 9.98004466467568  | -0.72074390283761 |
| H | 2.52536718261754 | 10.37383613888581 | -1.53939447831110 |
| C | 2.68955148657316 | 9.90841980178049  | 0.64335456767825  |
| H | 1.72980397541012 | 10.21460154573477 | 1.02847854951652  |
| C | 4.82260586409364 | 9.06512022965380  | 0.49535139255934  |
| H | 5.77668920790001 | 8.64659673439066  | 0.77355418187791  |
| C | 1.41146154701120 | 7.69316551111441  | -0.51818947460100 |
| C | 2.91419906724410 | 8.23564323924668  | -3.67579391122151 |
| H | 3.33183232900123 | 9.16794322293778  | -4.06511754715978 |
| H | 2.23989604122322 | 8.47875877058812  | -2.85991600307616 |
| H | 2.32947078983930 | 7.76395192299086  | -4.46998362341447 |
| C | 3.74385487438552 | 9.34920626074018  | 1.38859866513664  |
| H | 3.73491958433011 | 9.14824218653566  | 2.44858971792834  |
| C | 2.18530471196612 | 4.59048475436285  | -0.83972544166442 |
| H | 1.35748653347650 | 4.06376075170380  | -1.31549887202135 |
| H | 1.75961134702949 | 5.33611510314167  | -0.17791110163951 |
| H | 2.74283358821326 | 3.86987551181105  | -0.23123692354923 |
| C | 3.27434461501687 | 6.68565691287372  | 1.15023799000977  |
| C | 5.76982340860646 | 5.10555492717236  | -0.52851546966651 |
| H | 6.64288337785335 | 4.51863048861700  | -0.81636894833170 |
| H | 4.92836055762361 | 4.42723360272575  | -0.40859563621921 |
| H | 5.98269648196759 | 5.57277577096597  | 0.44034430410396  |
| C | 6.61490867196323 | 7.03159952107921  | -1.71912857754079 |
| H | 6.89615775431460 | 7.49837768751735  | -0.76992334858619 |
| H | 6.37940485148699 | 7.81282940903387  | -2.43585128898990 |
| H | 7.48458454952775 | 6.48442050091775  | -2.08784434395787 |
| C | 4.87720118531577 | 6.96943710544052  | -4.32220295555367 |
| H | 4.30066692111242 | 6.55158790472111  | -5.15209474426938 |
| H | 5.60239905850584 | 6.23051366312444  | -3.99577283111410 |
| H | 5.41325288478269 | 7.84812638210813  | -4.69033774930478 |
| C | 3.41585590554193 | 4.22443721925381  | -2.89504568168585 |
| H | 4.05711252762984 | 3.44359852280802  | -2.47370332427448 |
| H | 3.95378871119997 | 4.71116337812560  | -3.70239797781267 |
| H | 2.52480914550732 | 3.75175498382826  | -3.30933309127623 |

**1b<sup>F</sup>•Fp**

---

Temperature = 298.150 K

Pressure = 1.0000 Atm  
Electronic Energy = -2529.14681029  
Total Thermal Energy = -2528.76570086  
Enthalpy = -2528.76475665  
Free Energy = -2528.84051461

---

|    |                  |                   |                   |
|----|------------------|-------------------|-------------------|
| Fe | 3.31788364566214 | 8.16732232841299  | 0.06090458867345  |
| P  | 3.92371592646721 | 6.28859065892481  | -1.37976895743103 |
| O  | 0.67985470046451 | 6.96167721993102  | 0.38201186204476  |
| N  | 5.57456046258212 | 5.84261573866126  | -1.34603173150078 |
| N  | 4.09635230425402 | 7.18300865977865  | -2.89408266665512 |
| O  | 4.73282168385849 | 6.91711833198382  | 2.30030310299899  |
| N  | 2.92388623752643 | 5.09937546862518  | -2.06484828740710 |
| C  | 4.11733160025370 | 9.67728253832777  | -1.22866994665943 |
| H  | 4.60526166695163 | 9.45776033287690  | -2.16393433820898 |
| C  | 2.73170785736965 | 9.88679089902582  | -1.04557319974566 |
| H  | 1.98177181854050 | 9.91845922775851  | -1.81891740510723 |
| C  | 2.50682921538760 | 10.10908180192022 | 0.34722579666274  |
| H  | 1.55028219838114 | 10.29469799098602 | 0.81032186298397  |
| C  | 4.74742967949693 | 9.73240844380353  | 0.03115122666207  |
| H  | 5.80174486481574 | 9.60870240546027  | 0.22325509712511  |
| C  | 1.74541307685679 | 7.39163761430112  | 0.24457614025989  |
| C  | 2.89484162038801 | 7.76967206419147  | -3.43165015626581 |
| H  | 3.04646056629231 | 8.81406730175551  | -3.73797790606652 |
| H  | 2.09257226058971 | 7.75204058963975  | -2.69321061787491 |
| H  | 2.53899937661026 | 7.22722794618350  | -4.31990312310566 |
| C  | 3.74166556539443 | 10.01387143479668 | 1.01091415412045  |
| H  | 3.90351611285868 | 10.11507425090191 | 2.07263671328014  |
| C  | 1.95191407809072 | 4.28371268304656  | -1.34975827206031 |
| H  | 1.10165619292816 | 4.10156832192336  | -2.01281588838418 |
| H  | 1.58782983355755 | 4.78030332784880  | -0.45971983340150 |
| H  | 2.36227556962700 | 3.31161734588189  | -1.05354360501676 |
| C  | 4.15831927549953 | 7.32300974466501  | 1.38564208046025  |
| C  | 5.96537096891763 | 4.57787492902866  | -0.75312636737008 |
| H  | 6.93613275933287 | 4.28642666522422  | -1.16284435610648 |
| H  | 5.23781233074602 | 3.80763212318312  | -1.00086269204177 |
| H  | 6.05344430678484 | 4.62440590800631  | 0.33891624756373  |
| C  | 6.53603646168636 | 6.90245059617584  | -1.08823338870171 |
| H  | 6.68025385147480 | 7.09141878523838  | -0.01493321935387 |
| H  | 6.21480685681049 | 7.83296091737627  | -1.55291876482493 |
| H  | 7.50741071315117 | 6.63222421438479  | -1.51157362259877 |
| C  | 5.16905856147100 | 7.18054476597397  | -3.86132784642374 |
| H  | 4.81888604261523 | 6.82297948411433  | -4.84140451250922 |
| H  | 5.98446411402849 | 6.53528072823813  | -3.54814726891285 |

|   |                  |                  |                   |
|---|------------------|------------------|-------------------|
| H | 5.57346867376328 | 8.19107089339249 | -4.02386248738192 |
| C | 3.10049389485258 | 4.62521500632940 | -3.42833435386666 |
| H | 3.23117751038394 | 3.53819660172548 | -3.41573425882835 |
| H | 3.98019154362661 | 5.05233843624565 | -3.89531571728044 |
| H | 2.22871619320100 | 4.84309477649393 | -4.05558760161266 |
| F | 3.66327782644868 | 5.32338049725677 | 0.17463351986887  |



## VI. Multinuclear NMR Spectra

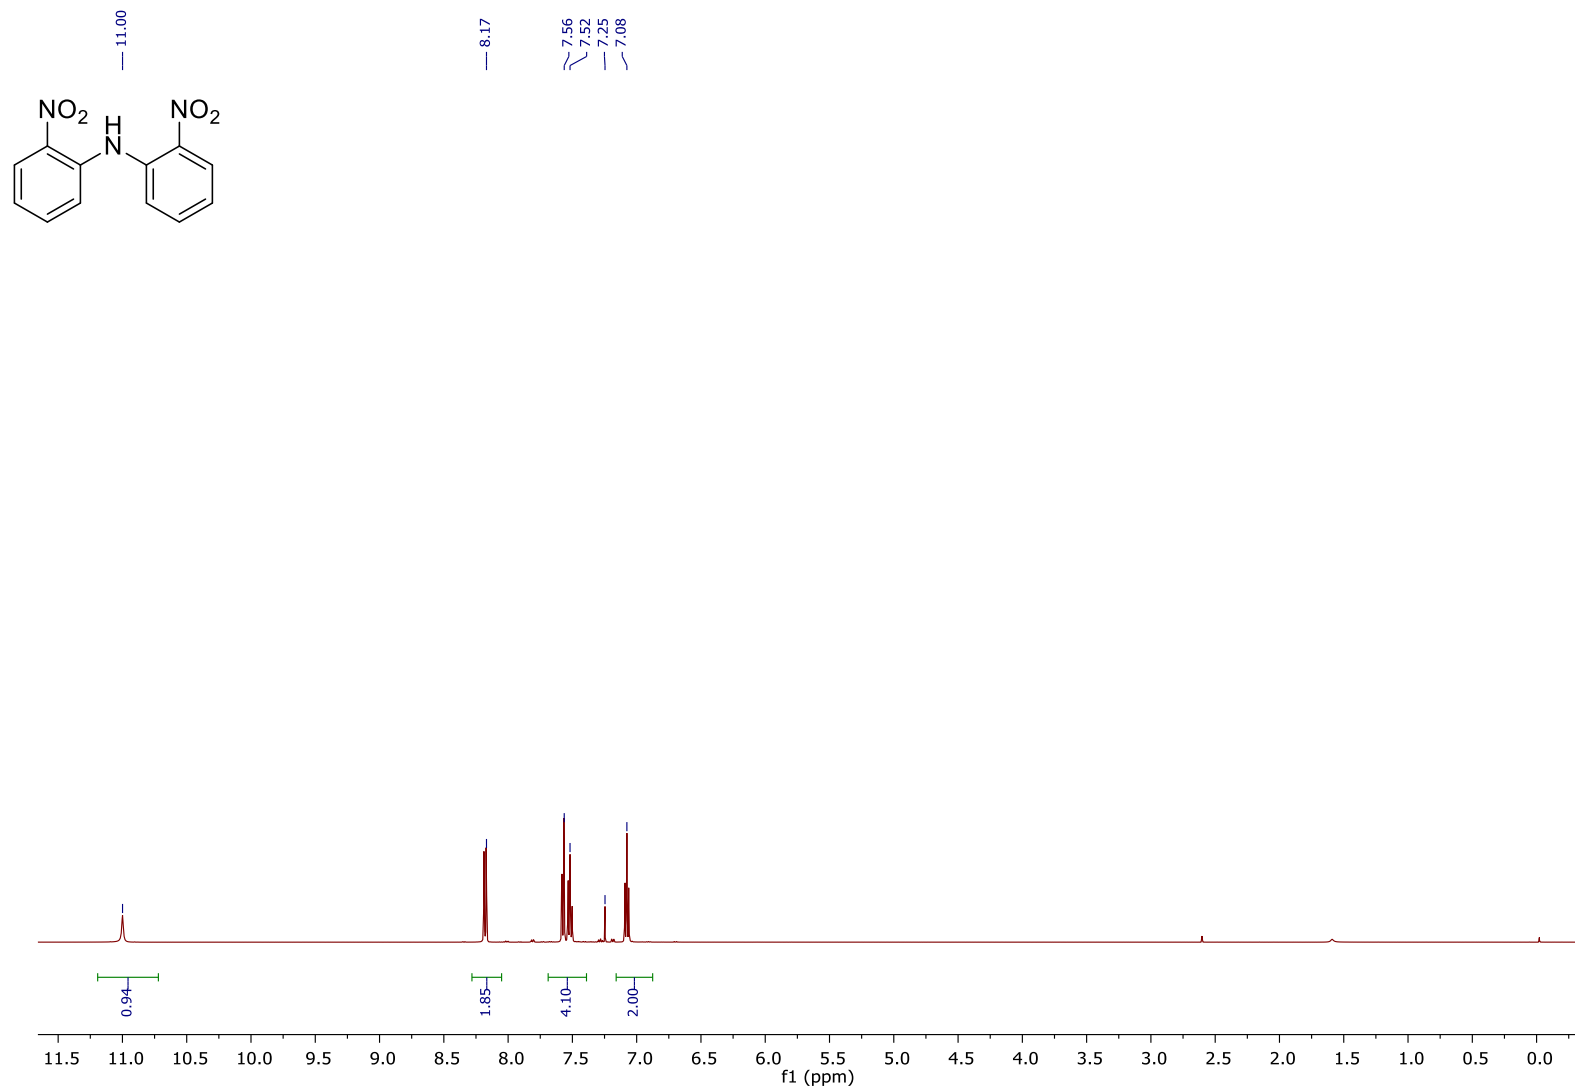

Figure S1.  $^1\text{H}$  NMR of S1.

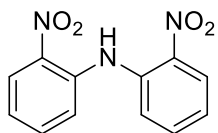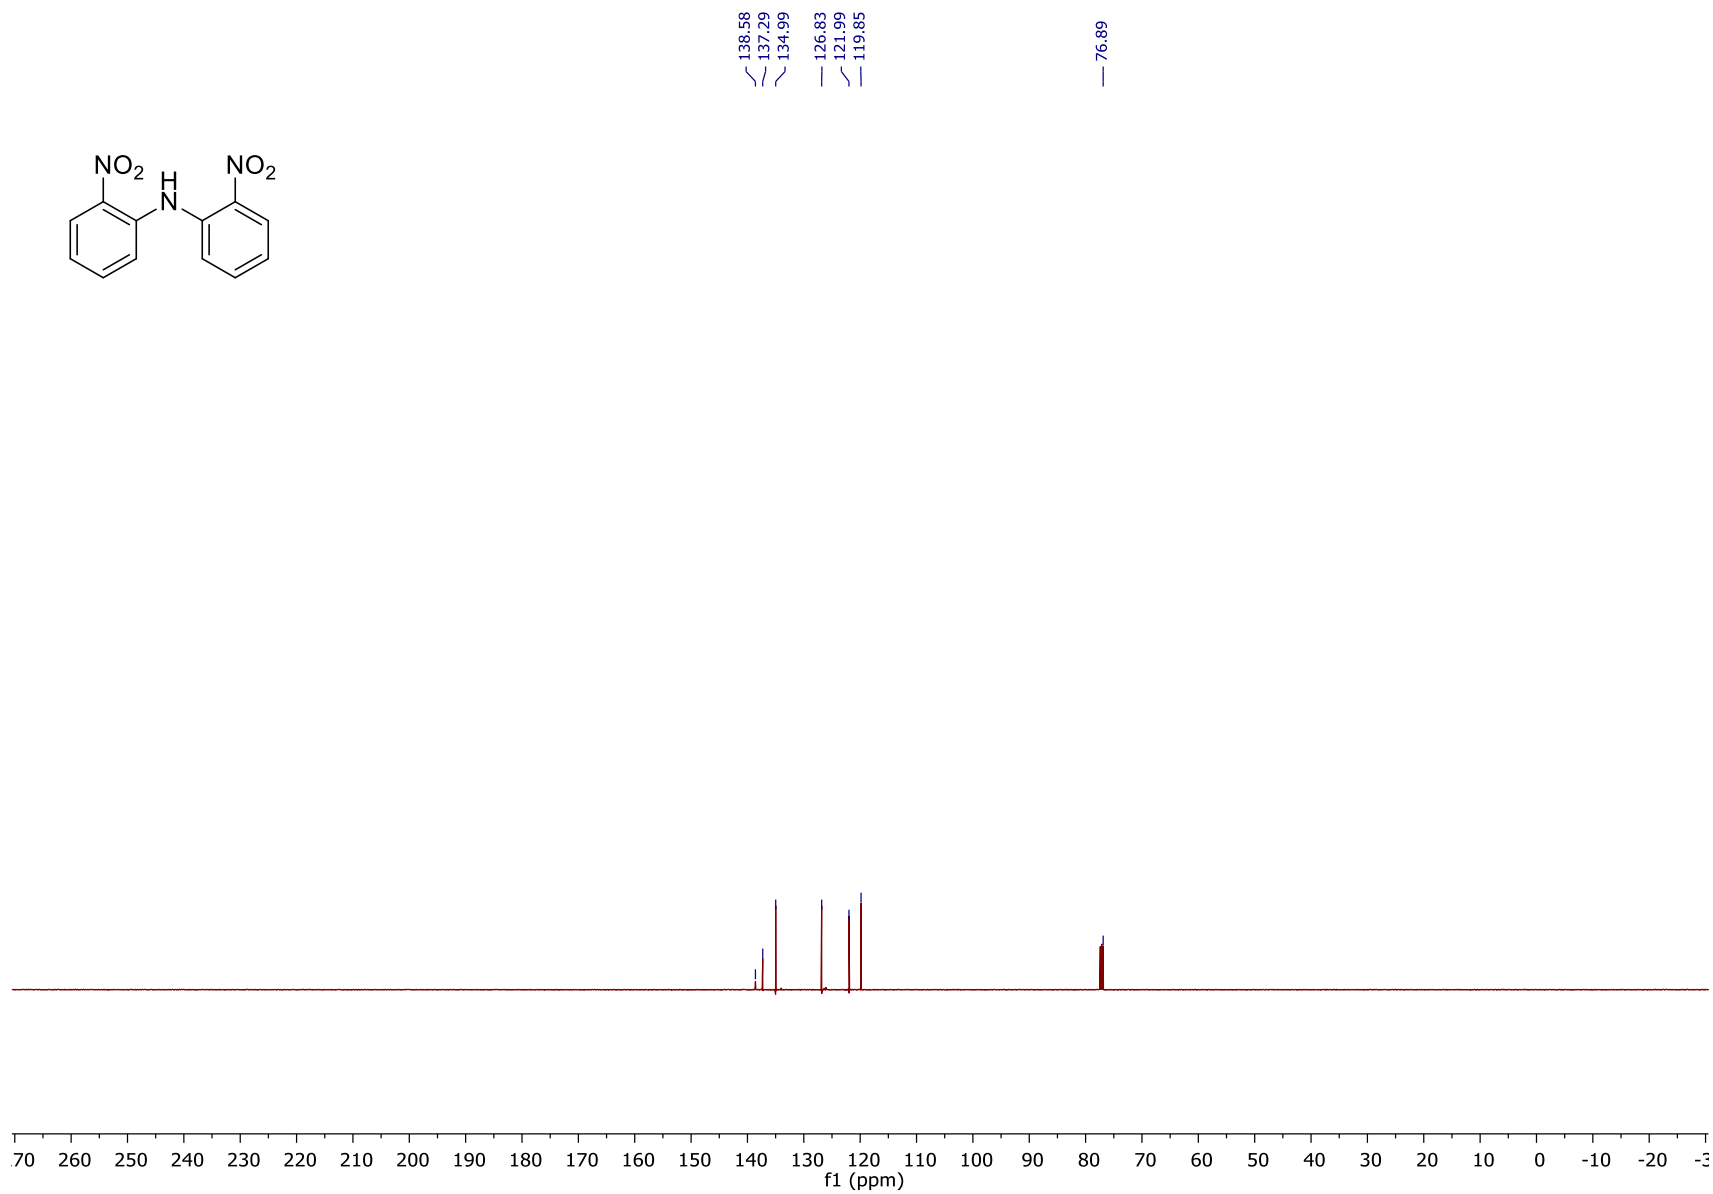

Figure S2.  $^{13}\text{C}\{^1\text{H}\}$  NMR of S1.

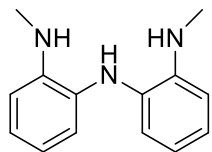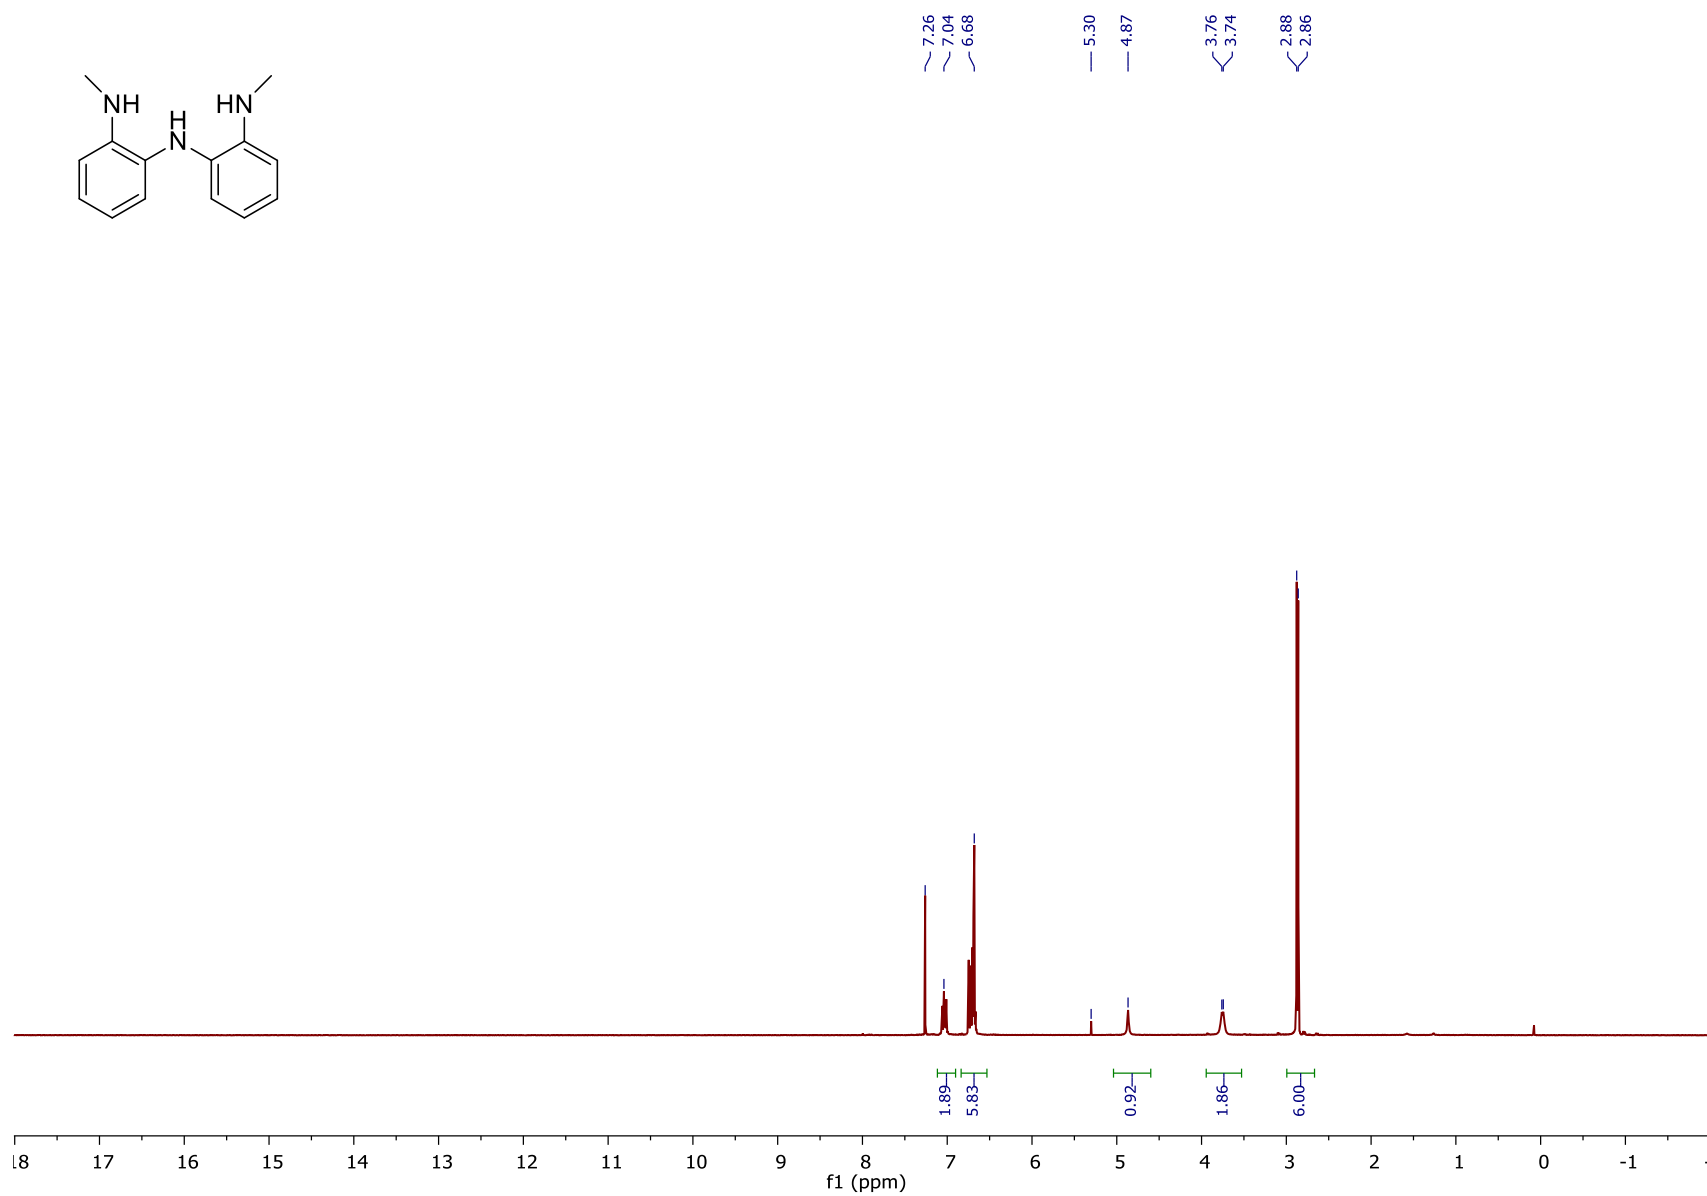

Figure S3. <sup>1</sup>H NMR of S2.

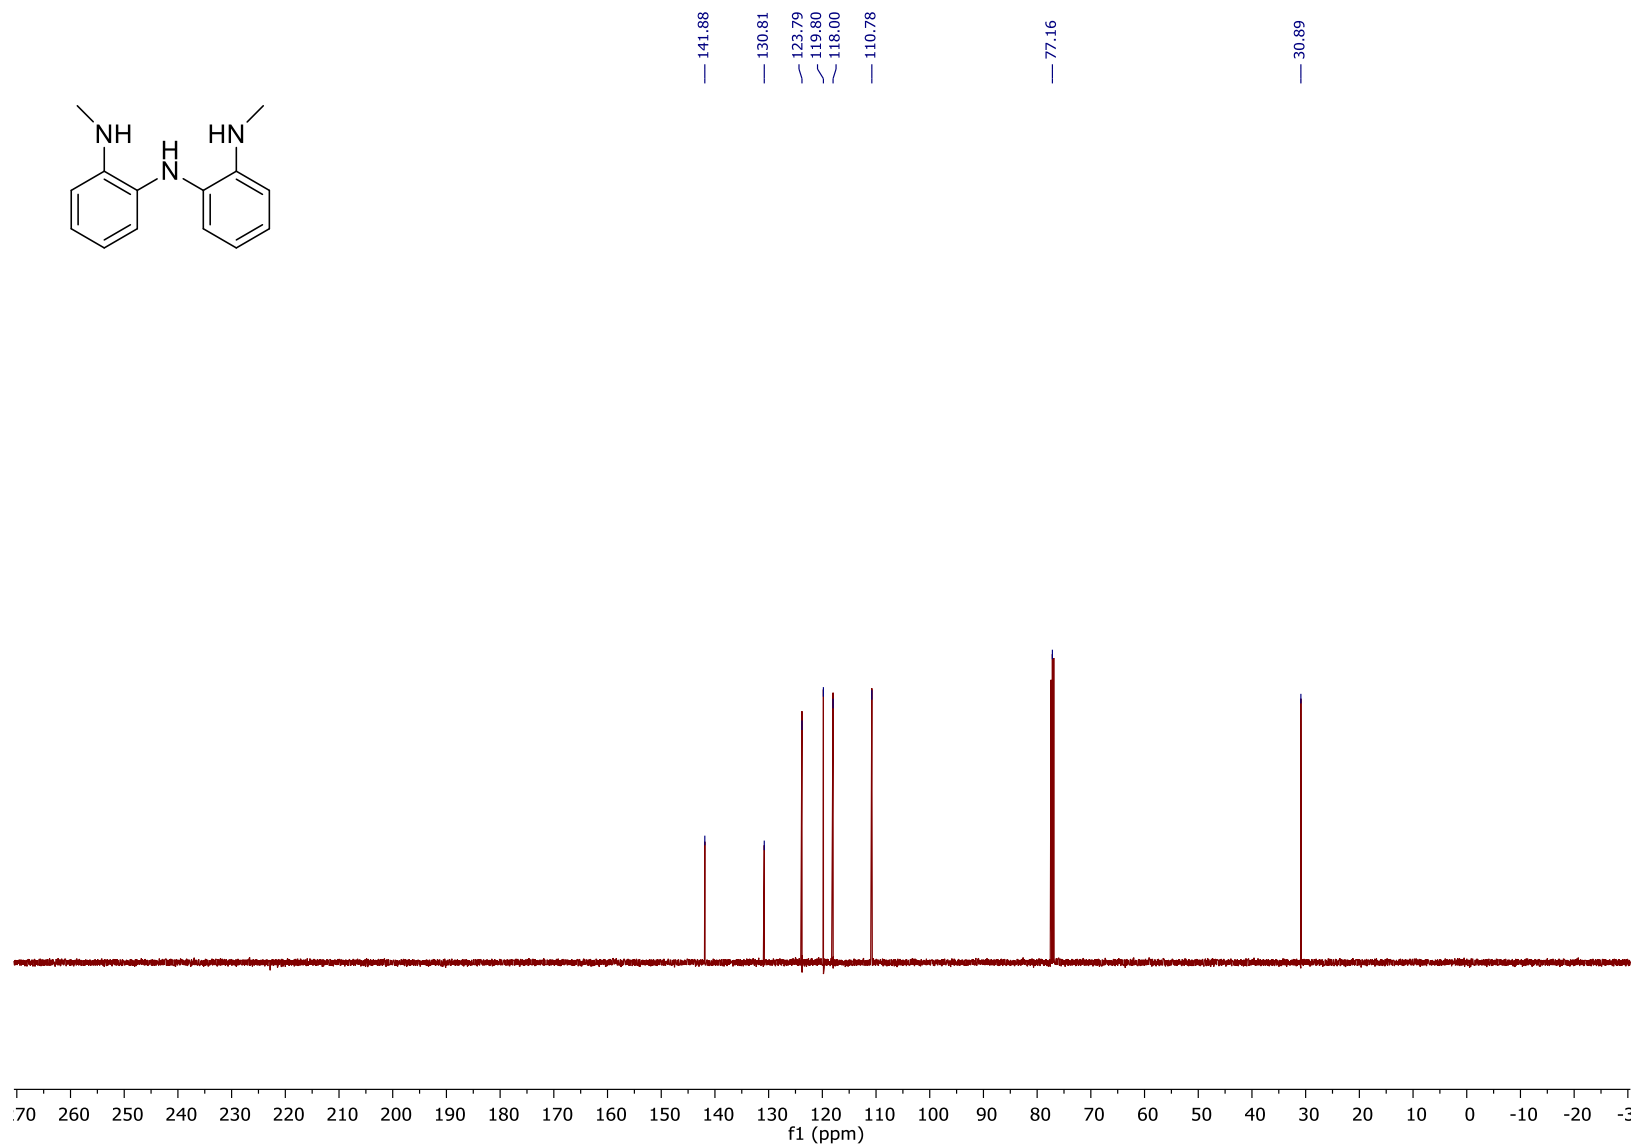

Figure S4.  $^{13}\text{C}\{^1\text{H}\}$  NMR of S2.

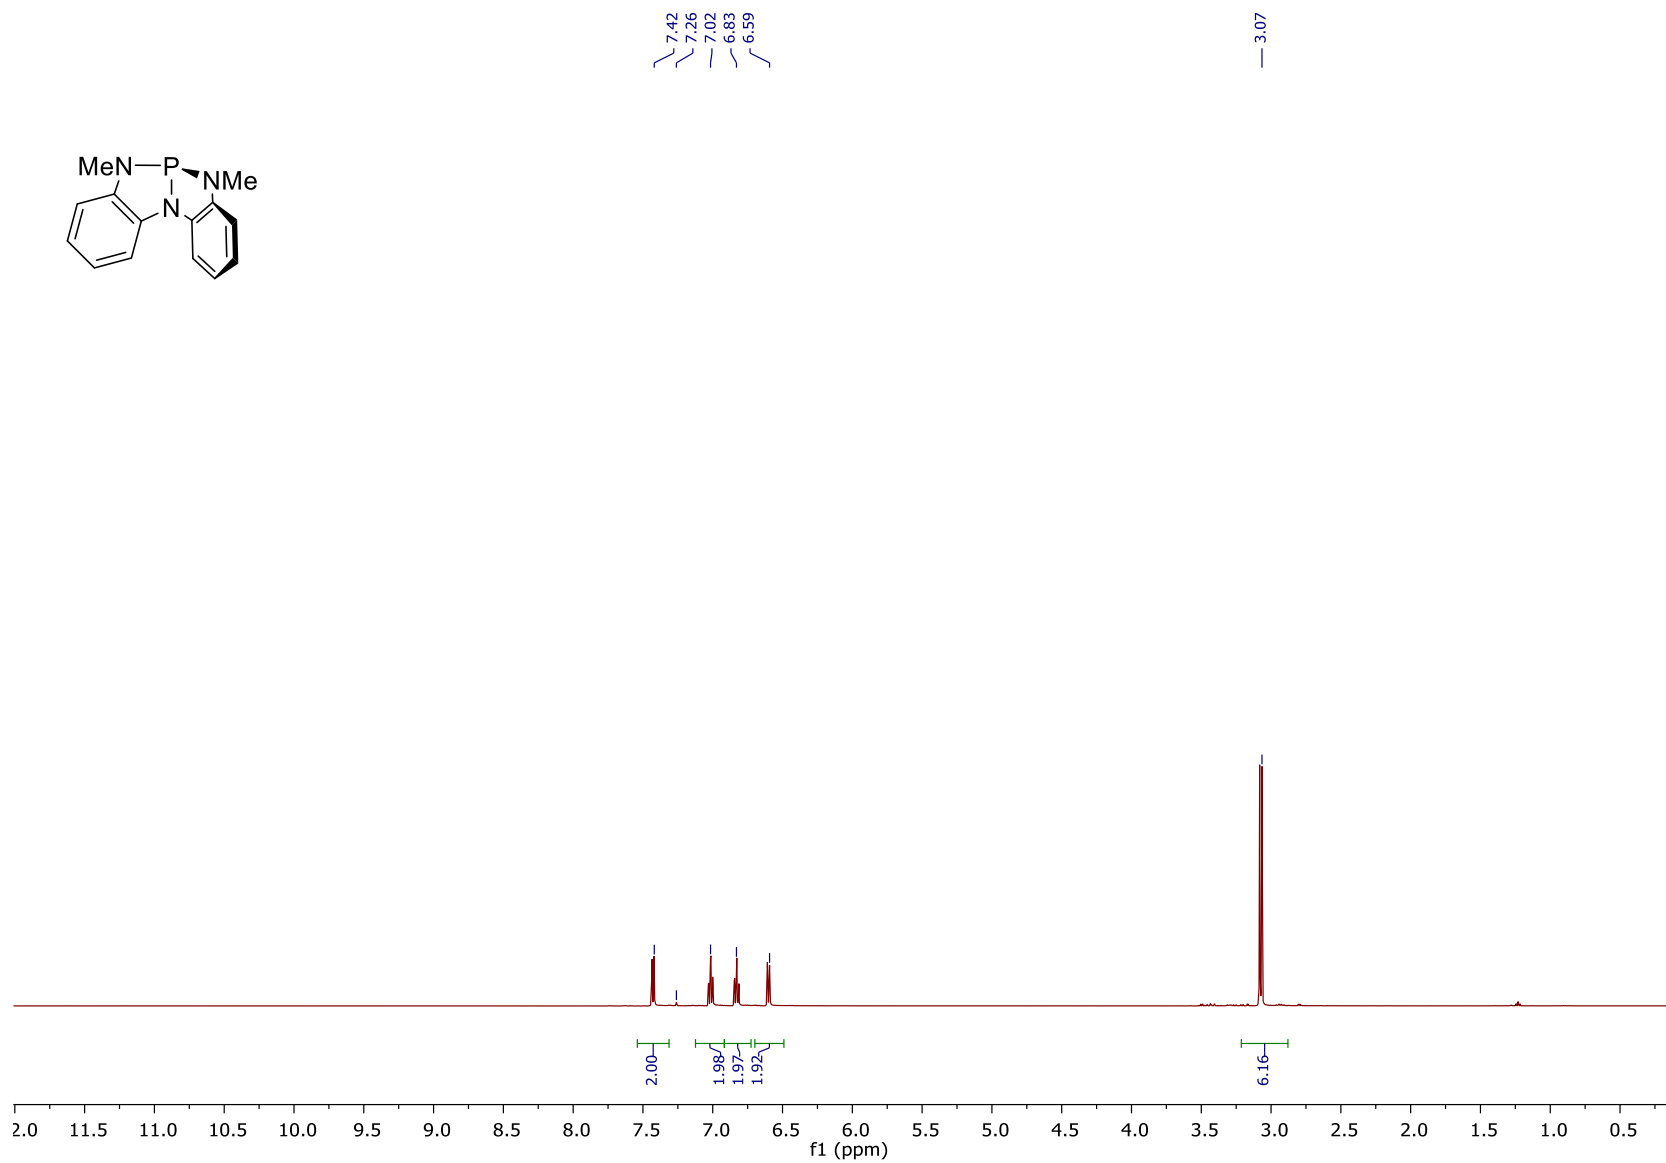

Figure S5. <sup>1</sup>H NMR of 1a.

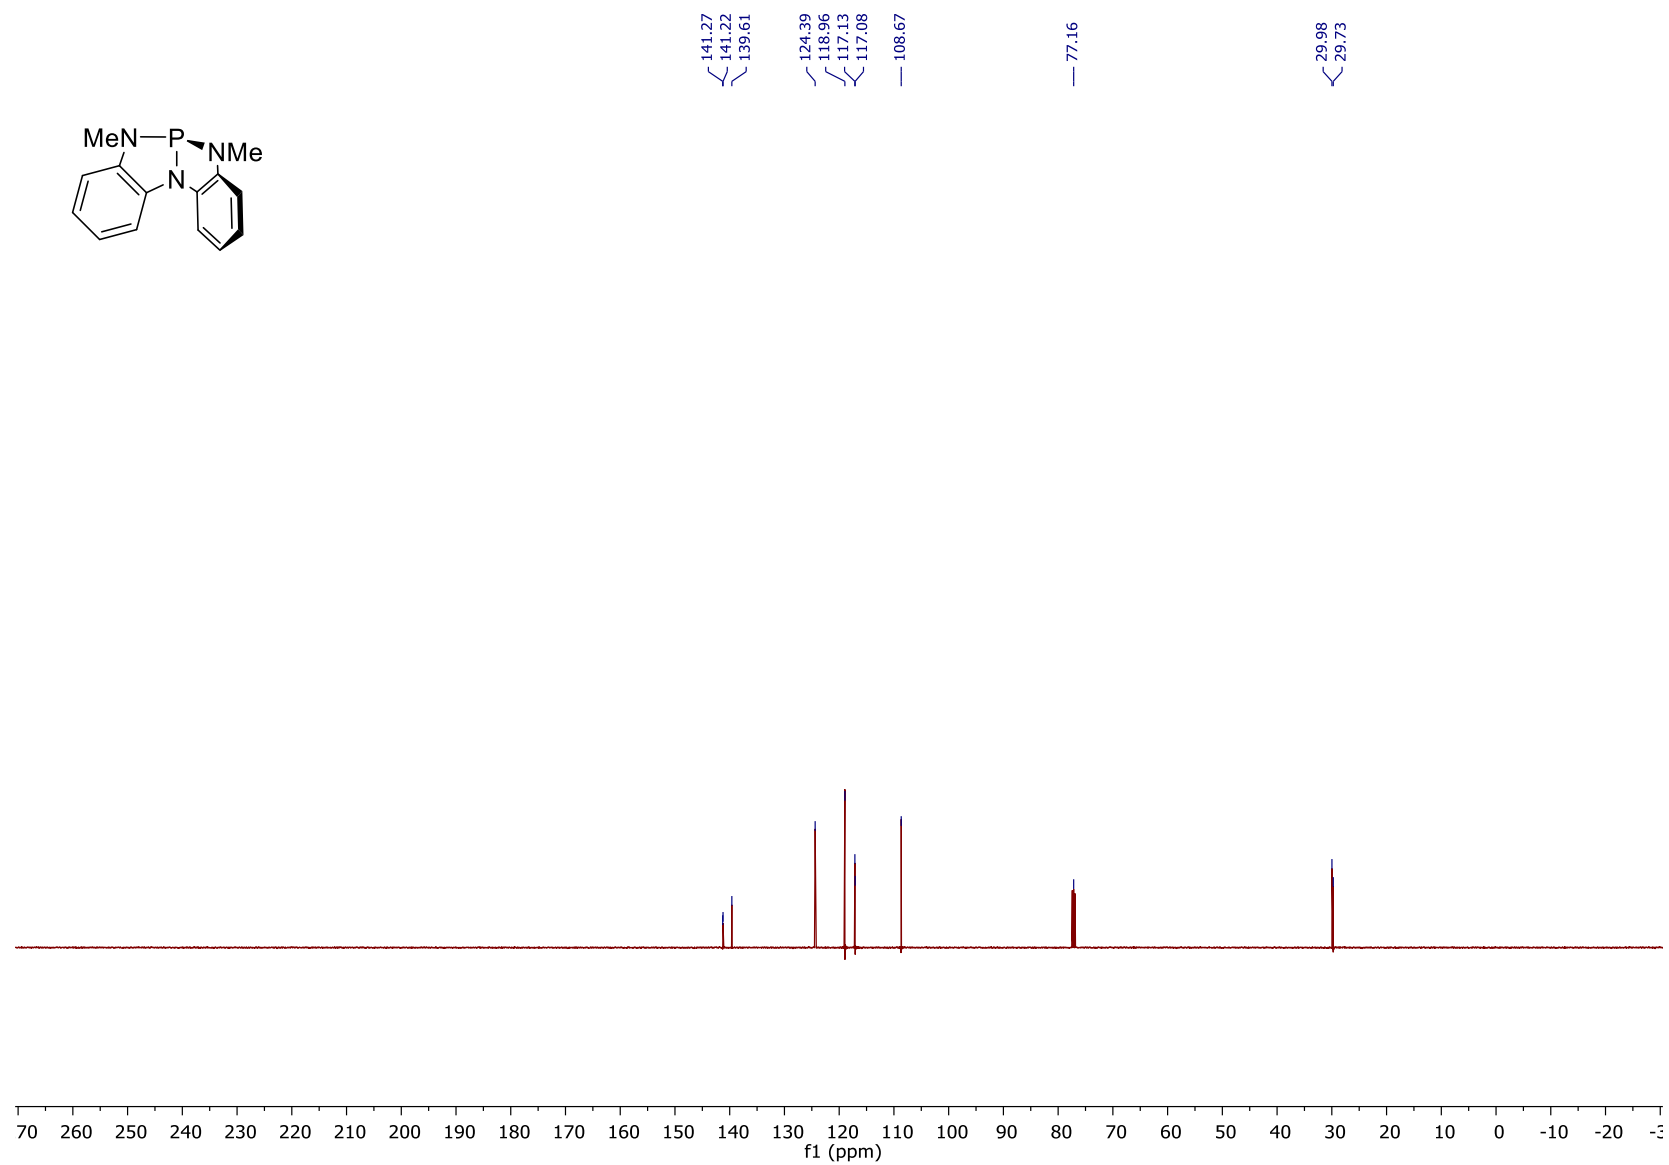

Figure S6.  $^{13}\text{C}\{^1\text{H}\}$  NMR of 1a.

— 160.37

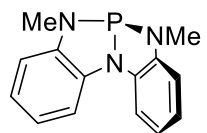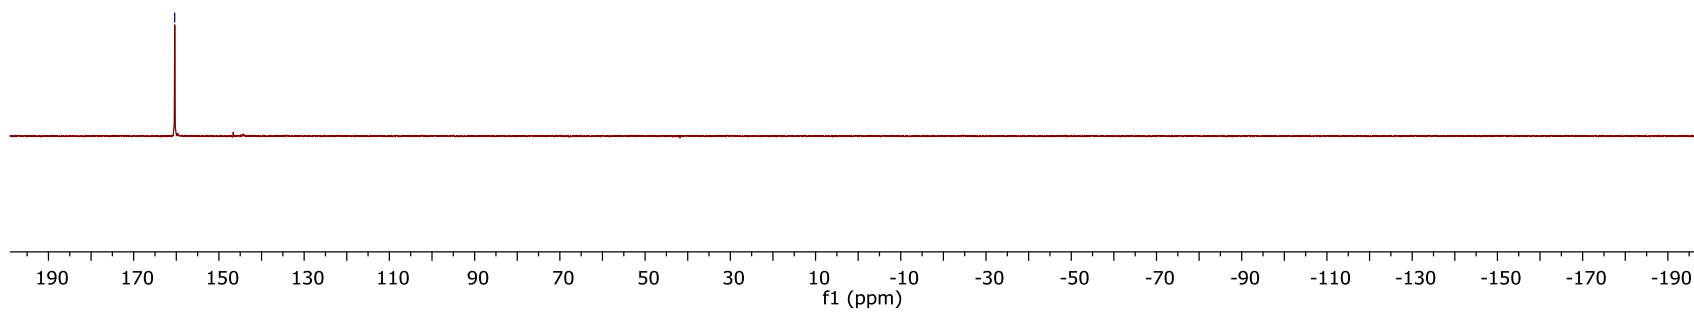

**Figure S7.**  $^{31}\text{P}\{^1\text{H}\}$  NMR of **1a**.





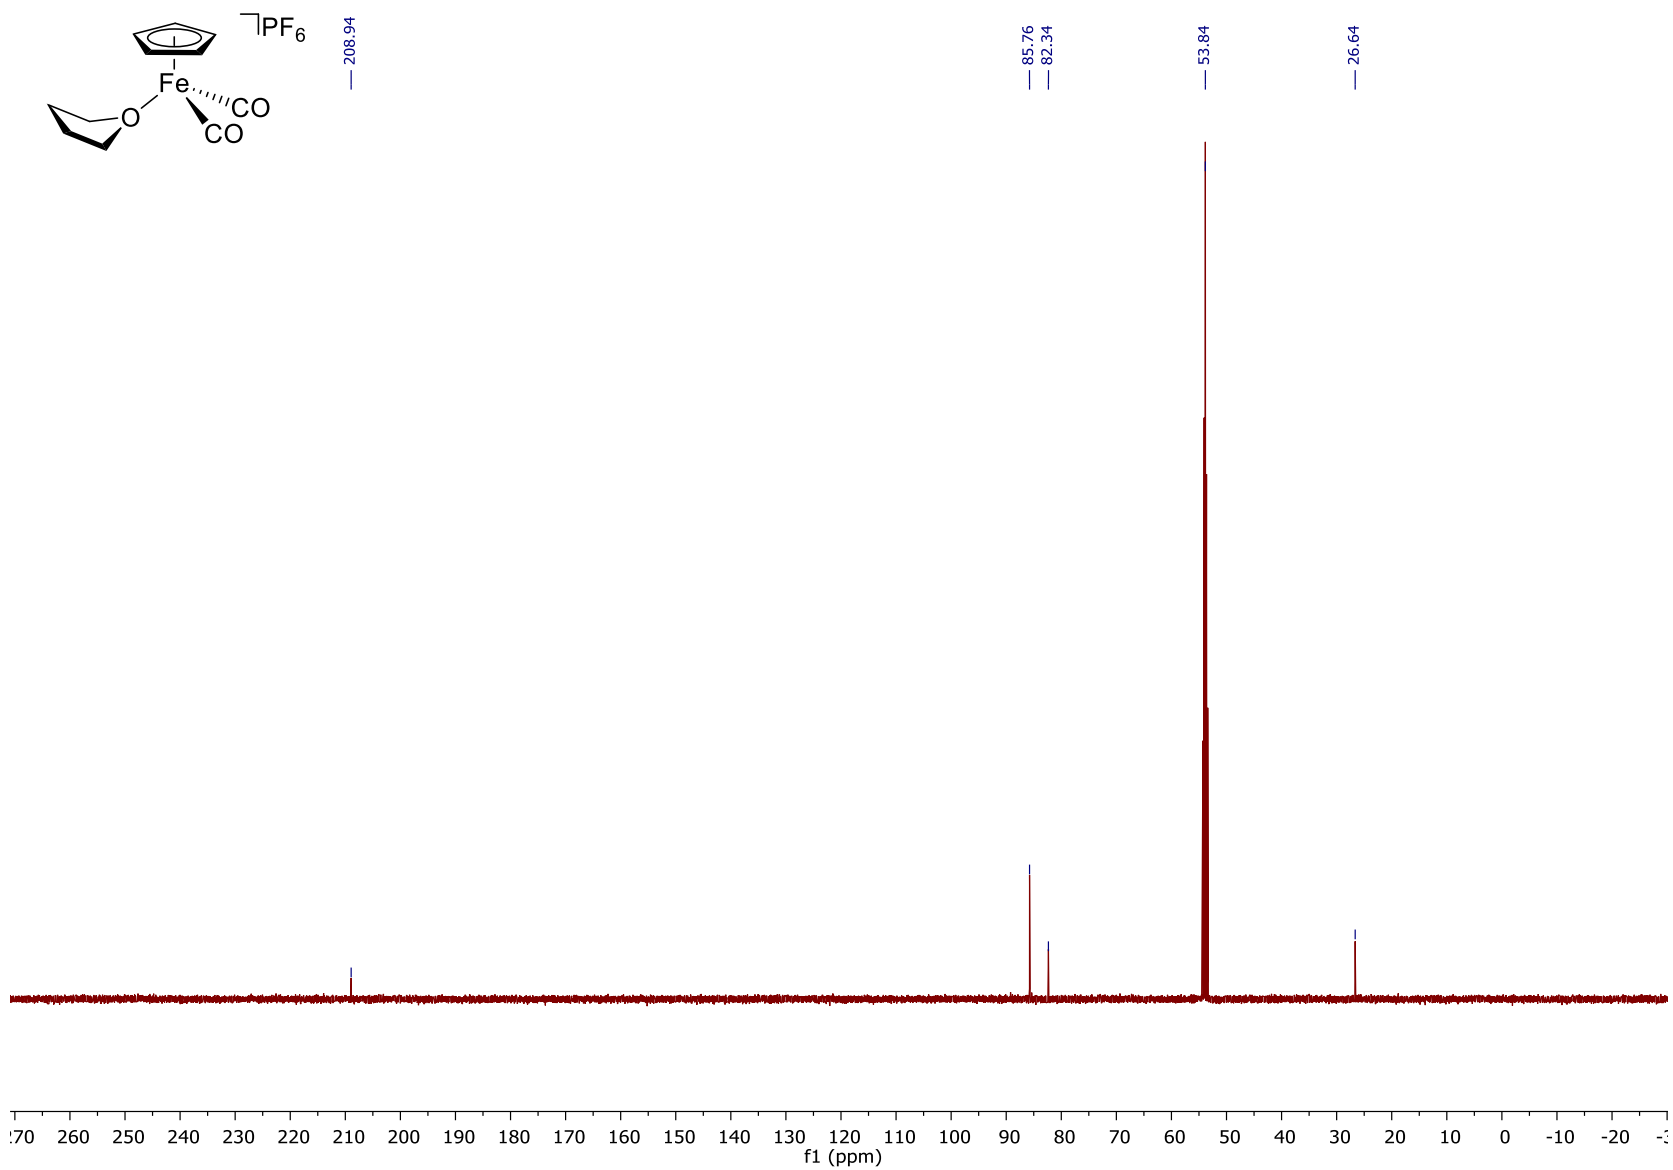

Figure S9. <sup>13</sup>C{<sup>1</sup>H} NMR of (thf)•Fp<sup>+</sup>.

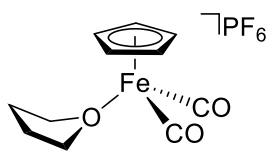

-72.13  
-73.64

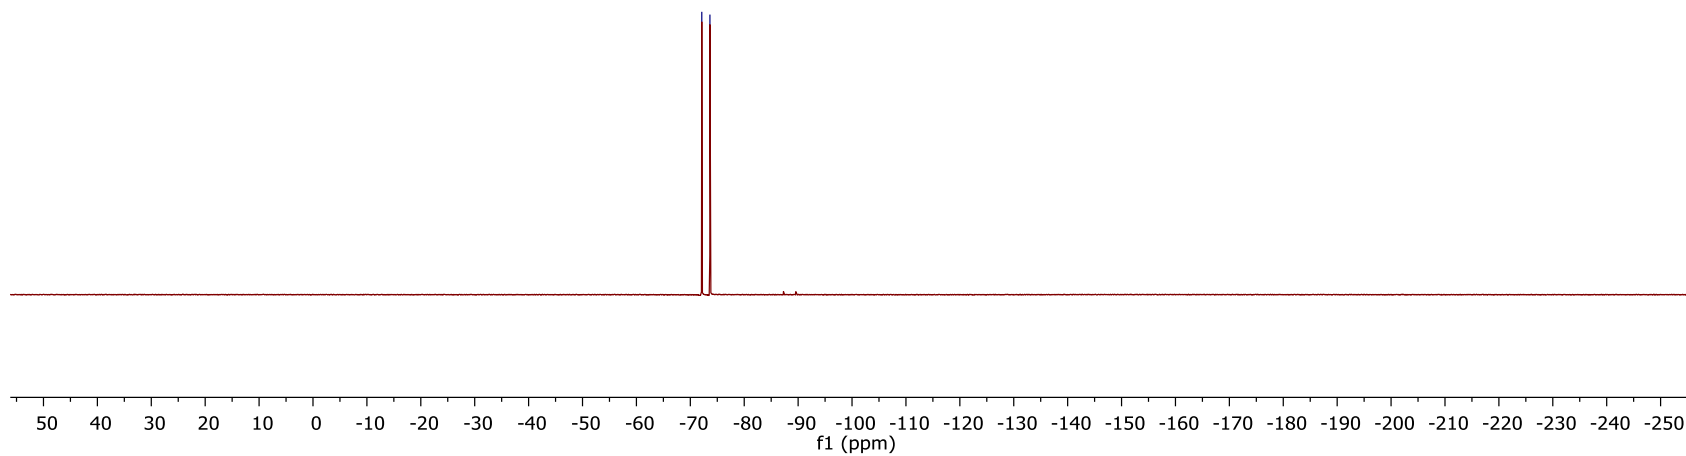

**Figure S10.**  $^{19}\text{F}$  NMR of  $(\text{thf})\cdot\text{Fp}^+$ .

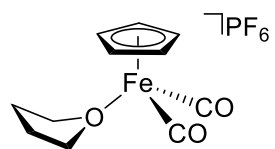

-137.00  
-140.51  
-144.02  
-147.53  
-151.03

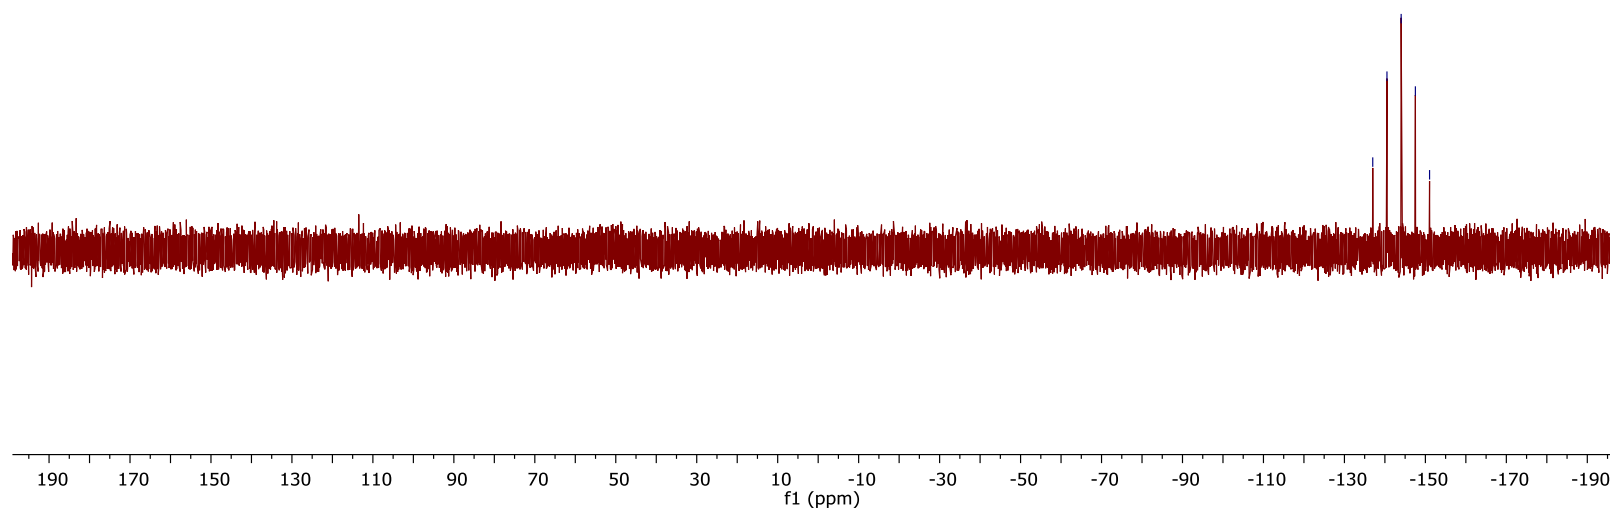

**Figure S11.**  $^{31}\text{P}\{^1\text{H}\}$  NMR of  $(\text{thf})\cdot\text{Fp}^+$ .

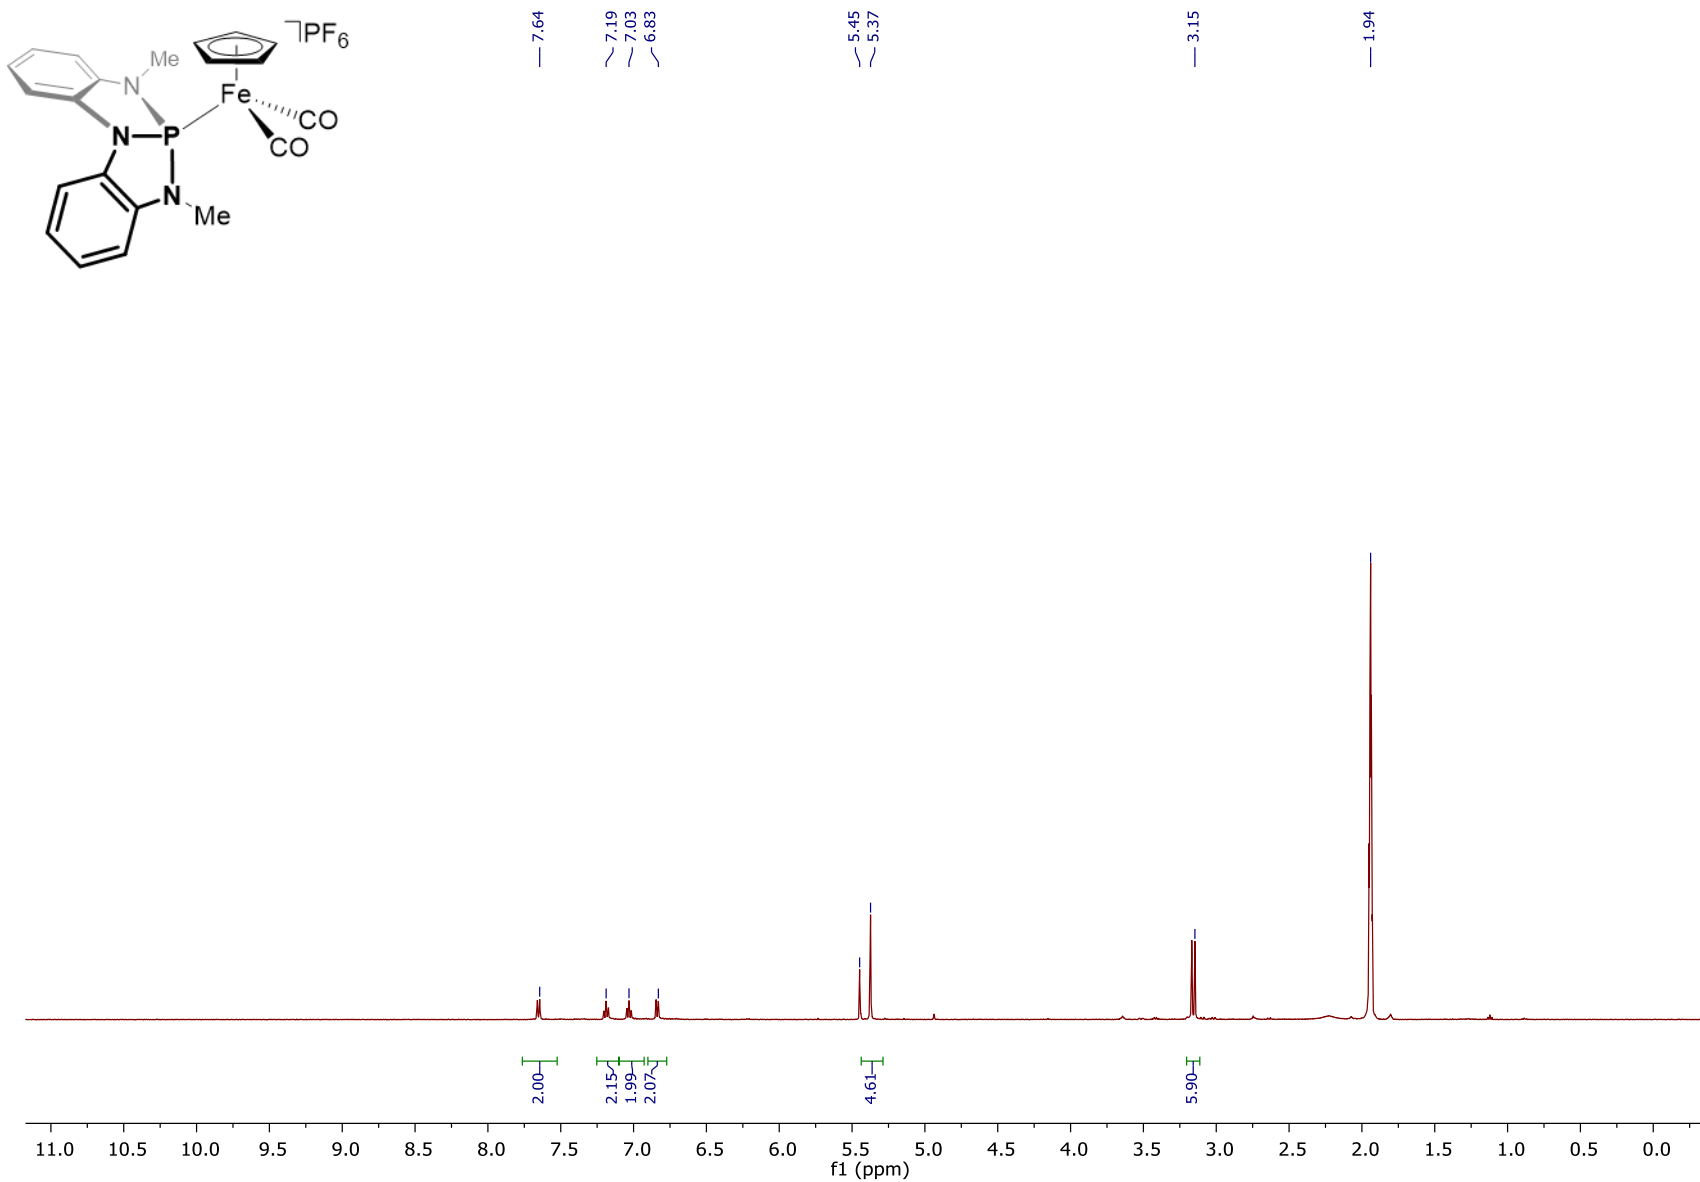

Figure S12. <sup>1</sup>H NMR of **1a•Fp<sup>+</sup>**.

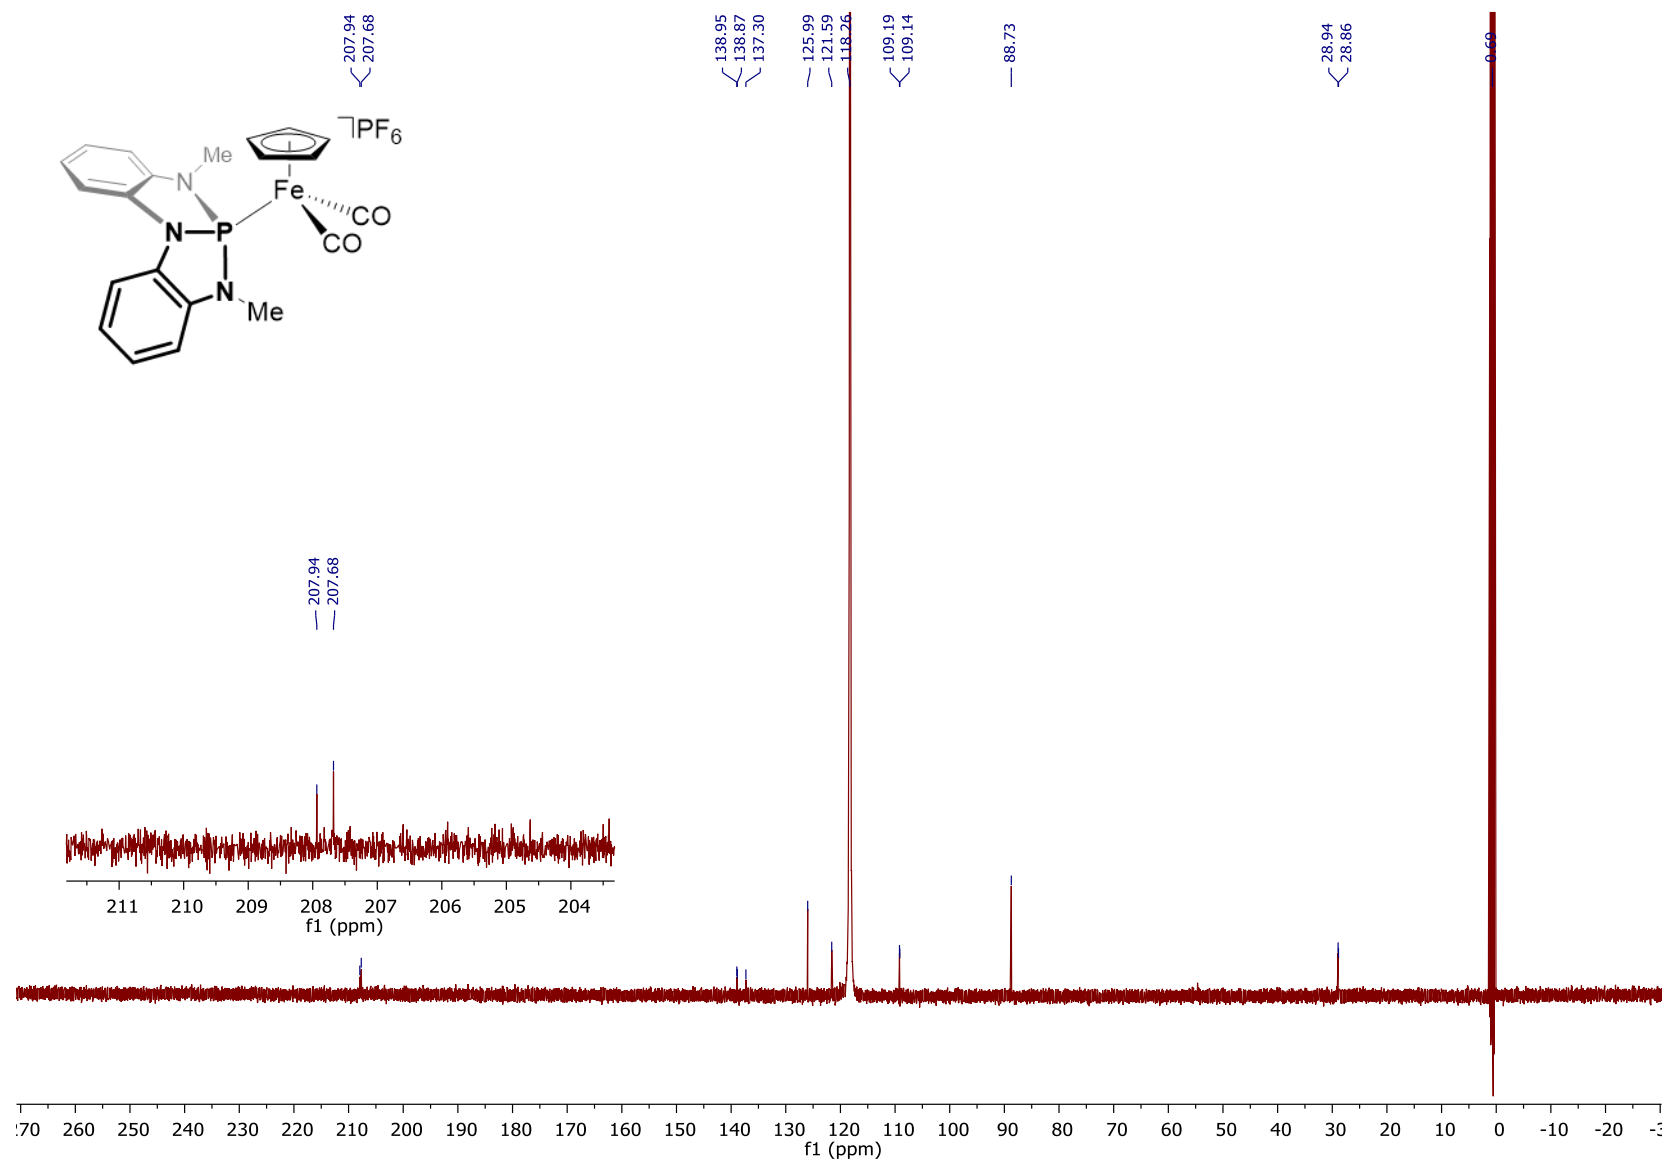

Figure S13. <sup>13</sup>C{<sup>1</sup>H} NMR of **1a**•Fp<sup>+</sup>.

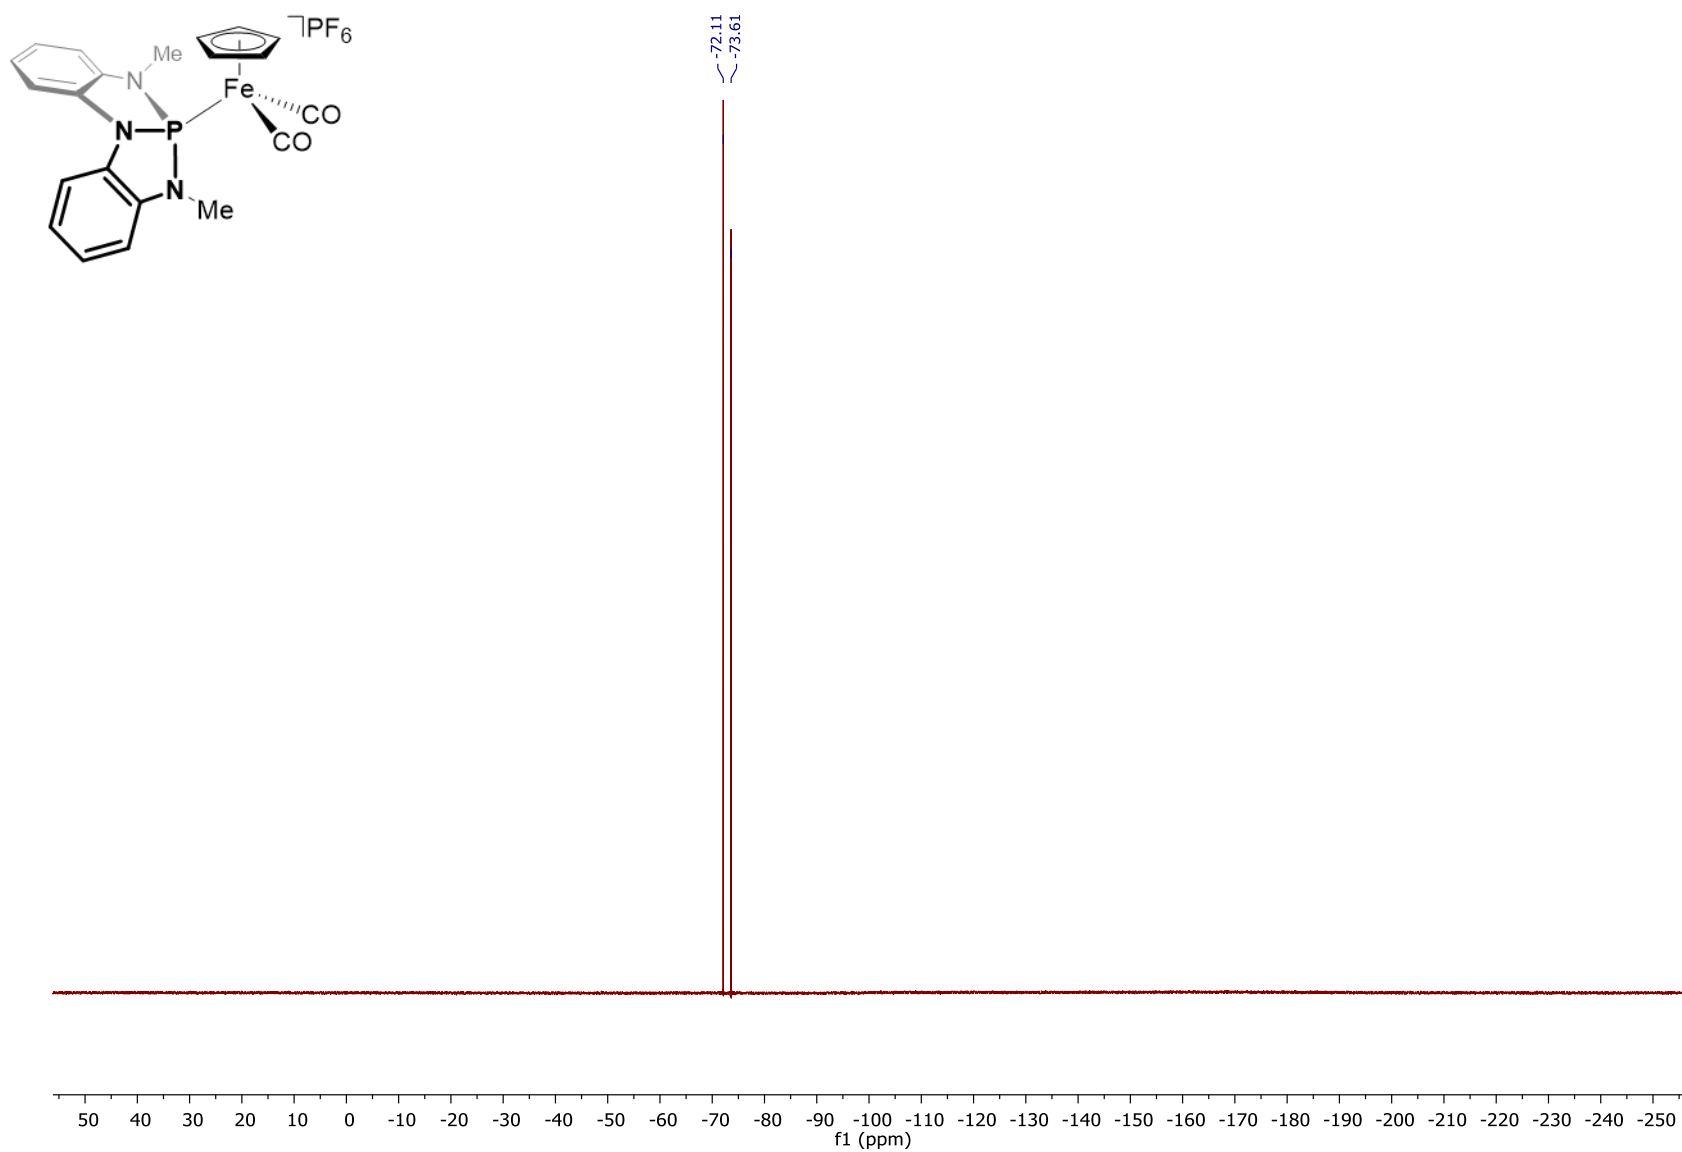

Figure S14.  $^{19}F$  NMR of  $1a \cdot Fp^+$ .

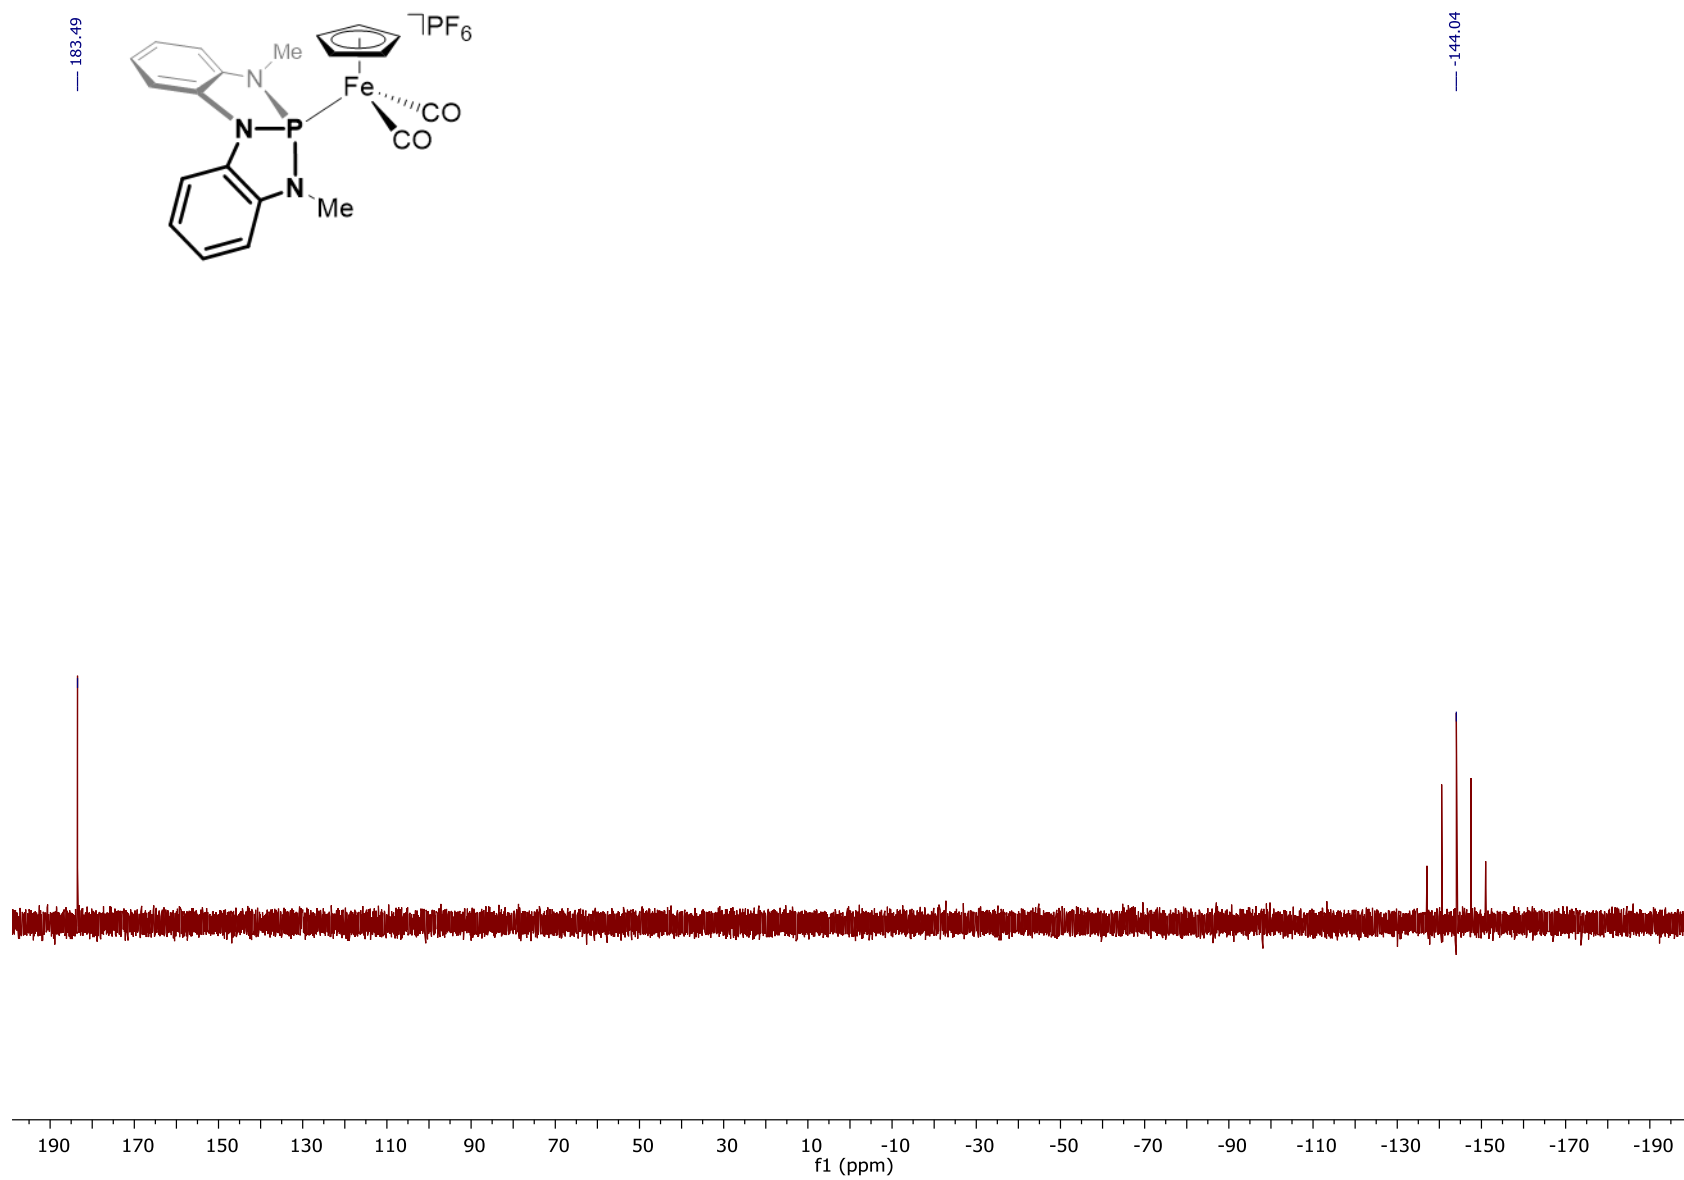

**Figure S15.**  $^{31}P\{^1H\}$  NMR of  $1a \cdot Fp^+$ .

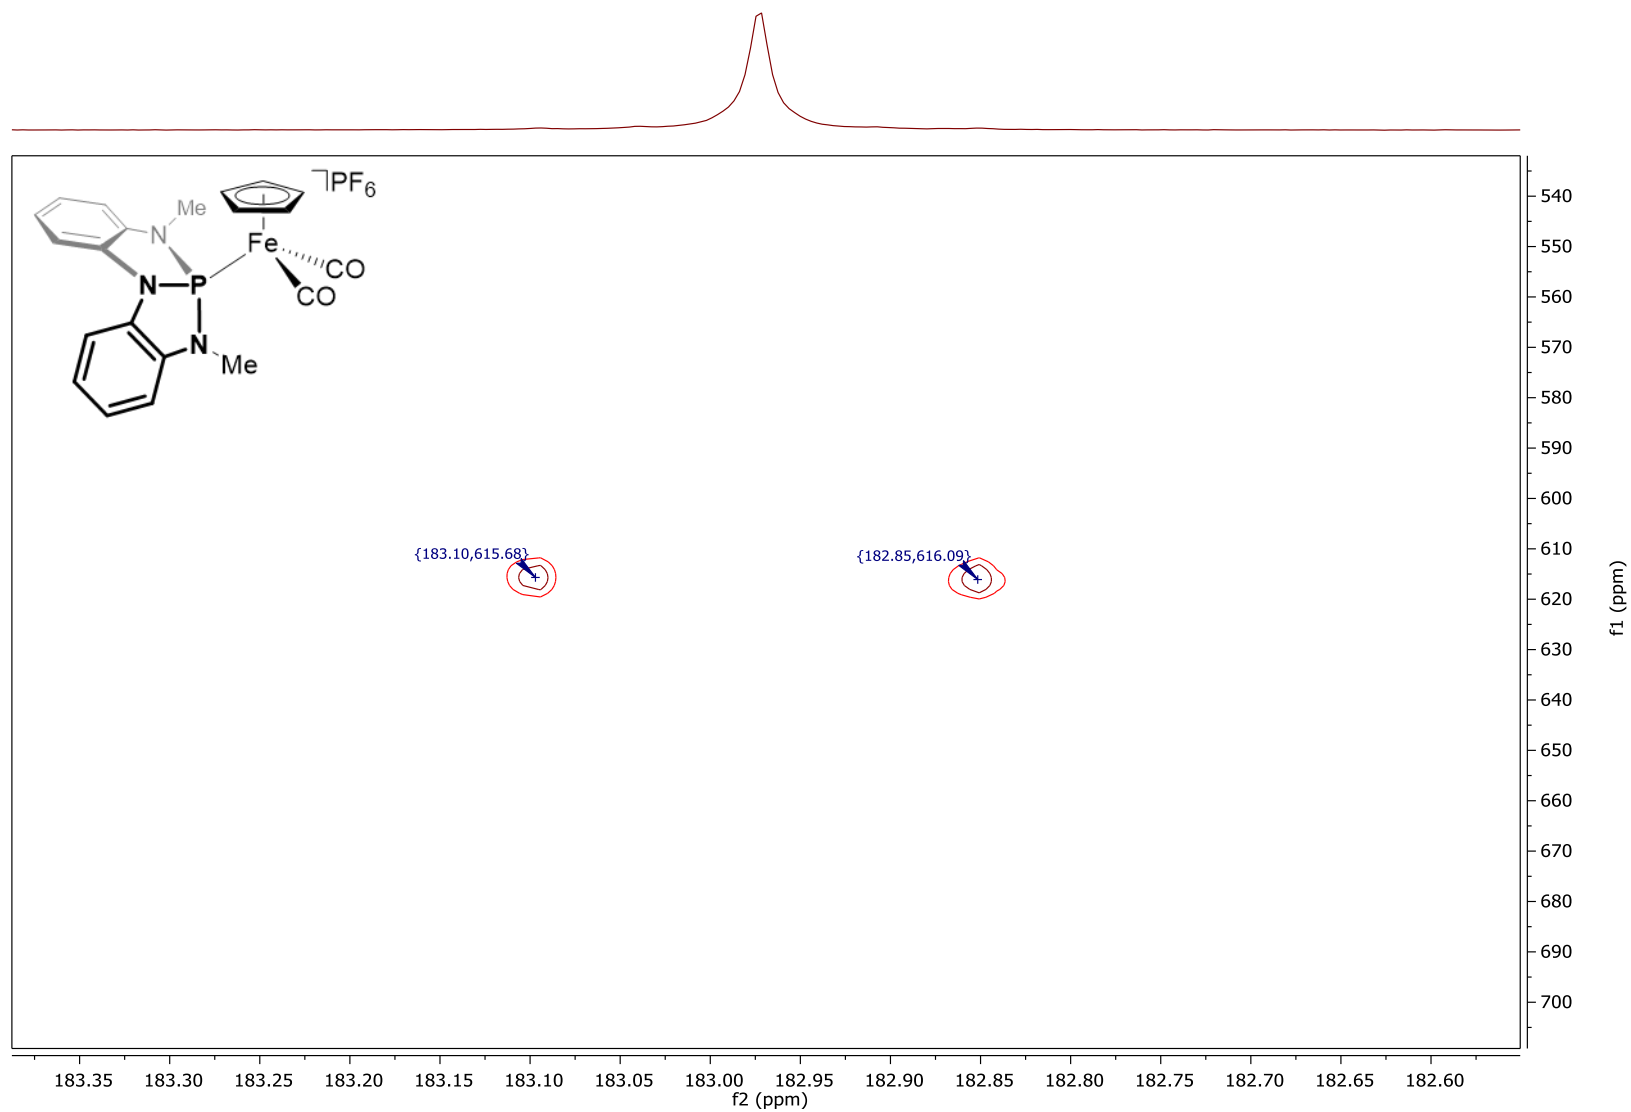

**Figure S16.**  $^{31}\text{P}$ - $^{57}\text{Fe}$  2D NMR of  $\mathbf{1a}\cdot\text{Fp}^+$ . f1 is  $^{57}\text{Fe}$  and f2 is  $^{31}\text{P}$ . 1-D  $^{31}\text{P}\{^1\text{H}\}$  NMR shown along top horizontal axis



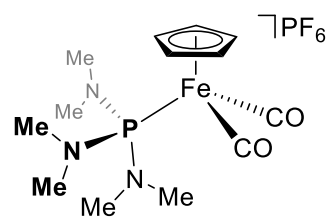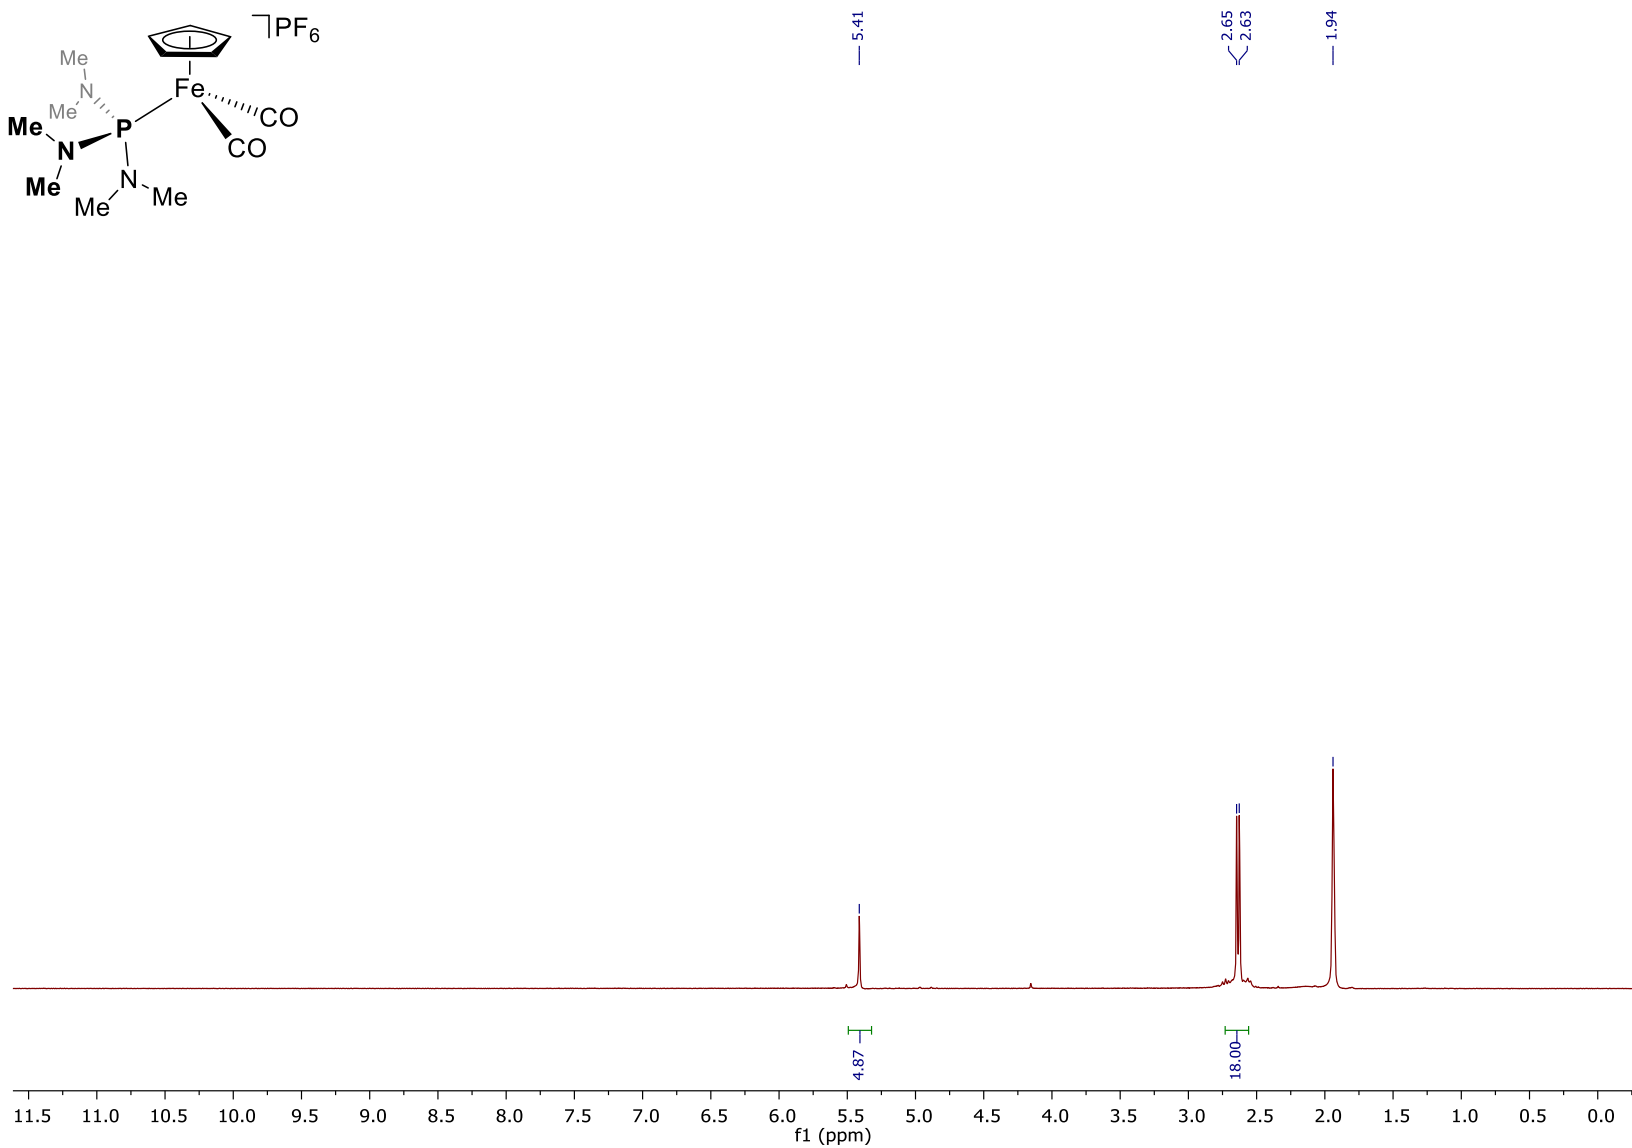

Figure S17. <sup>1</sup>H NMR of **1b**•Fp<sup>+</sup>.

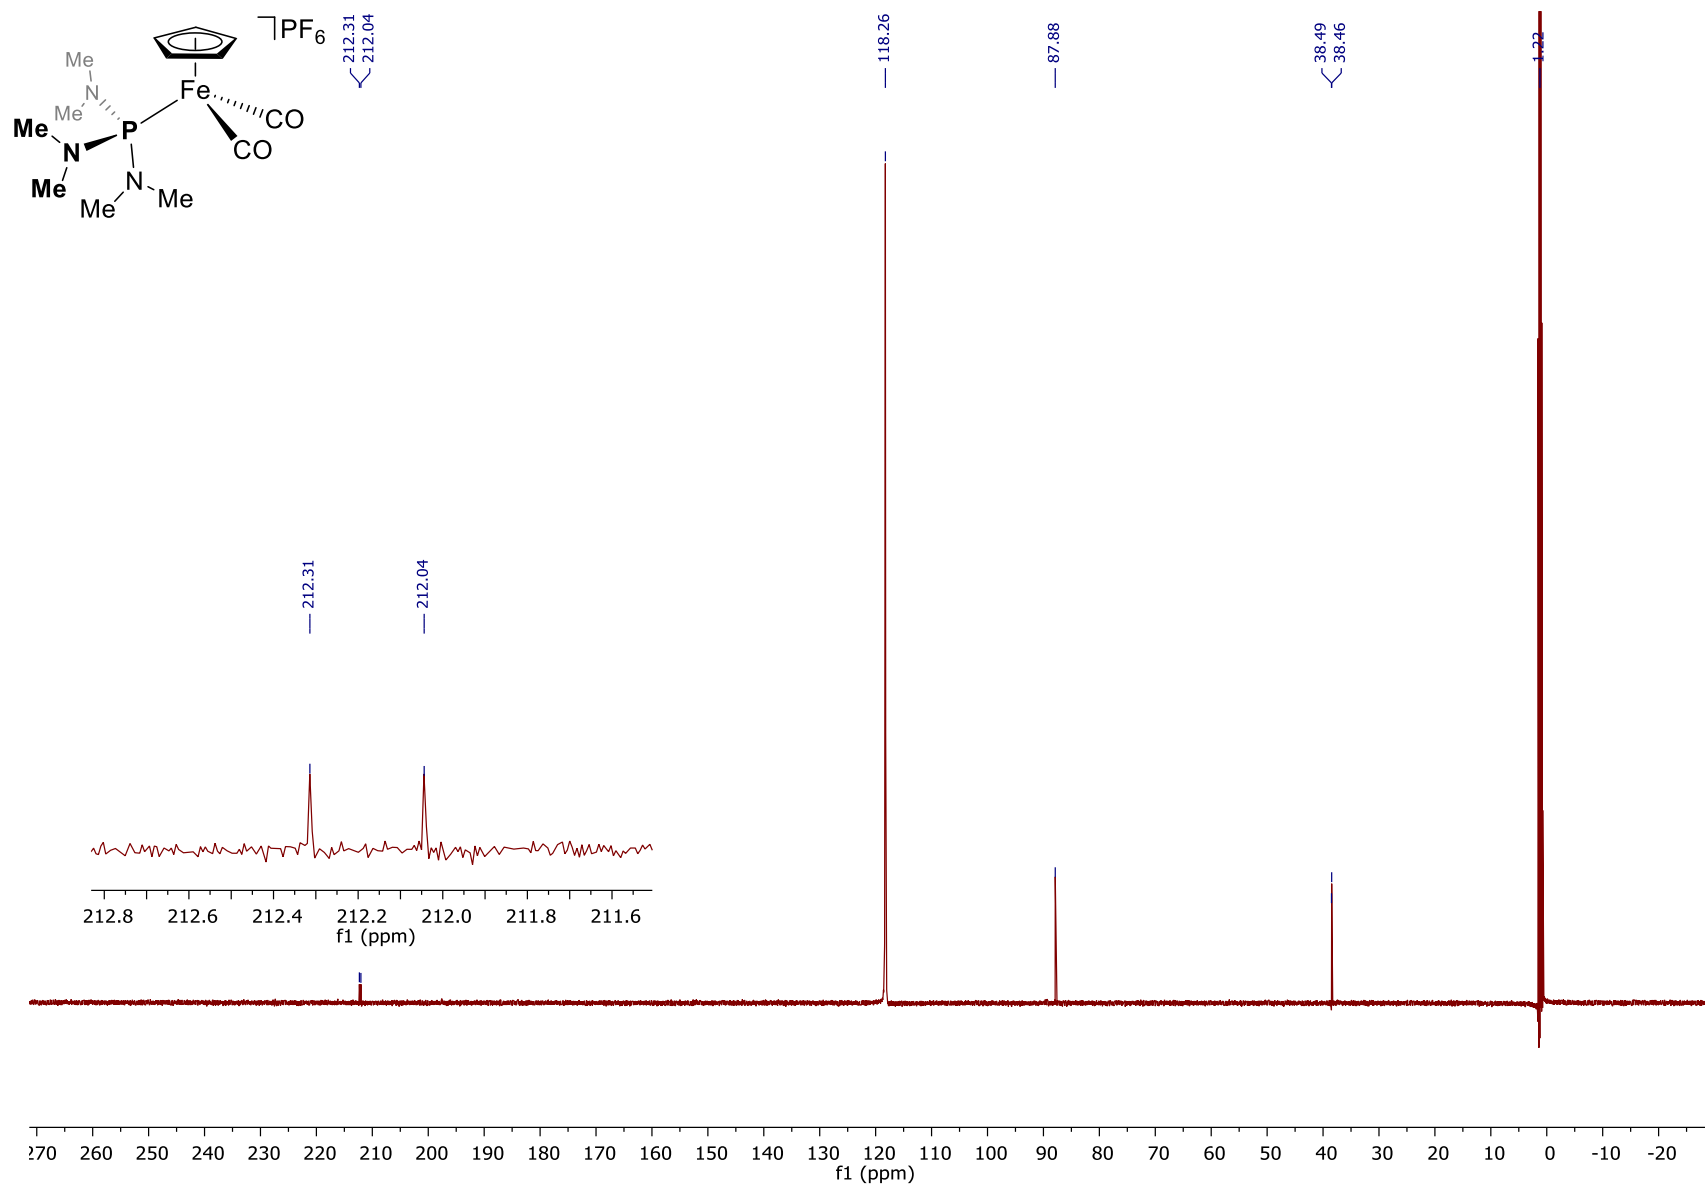

Figure S18.  $^{13}C\{^1H\}$  NMR of  $1b \cdot Fp^+$ .

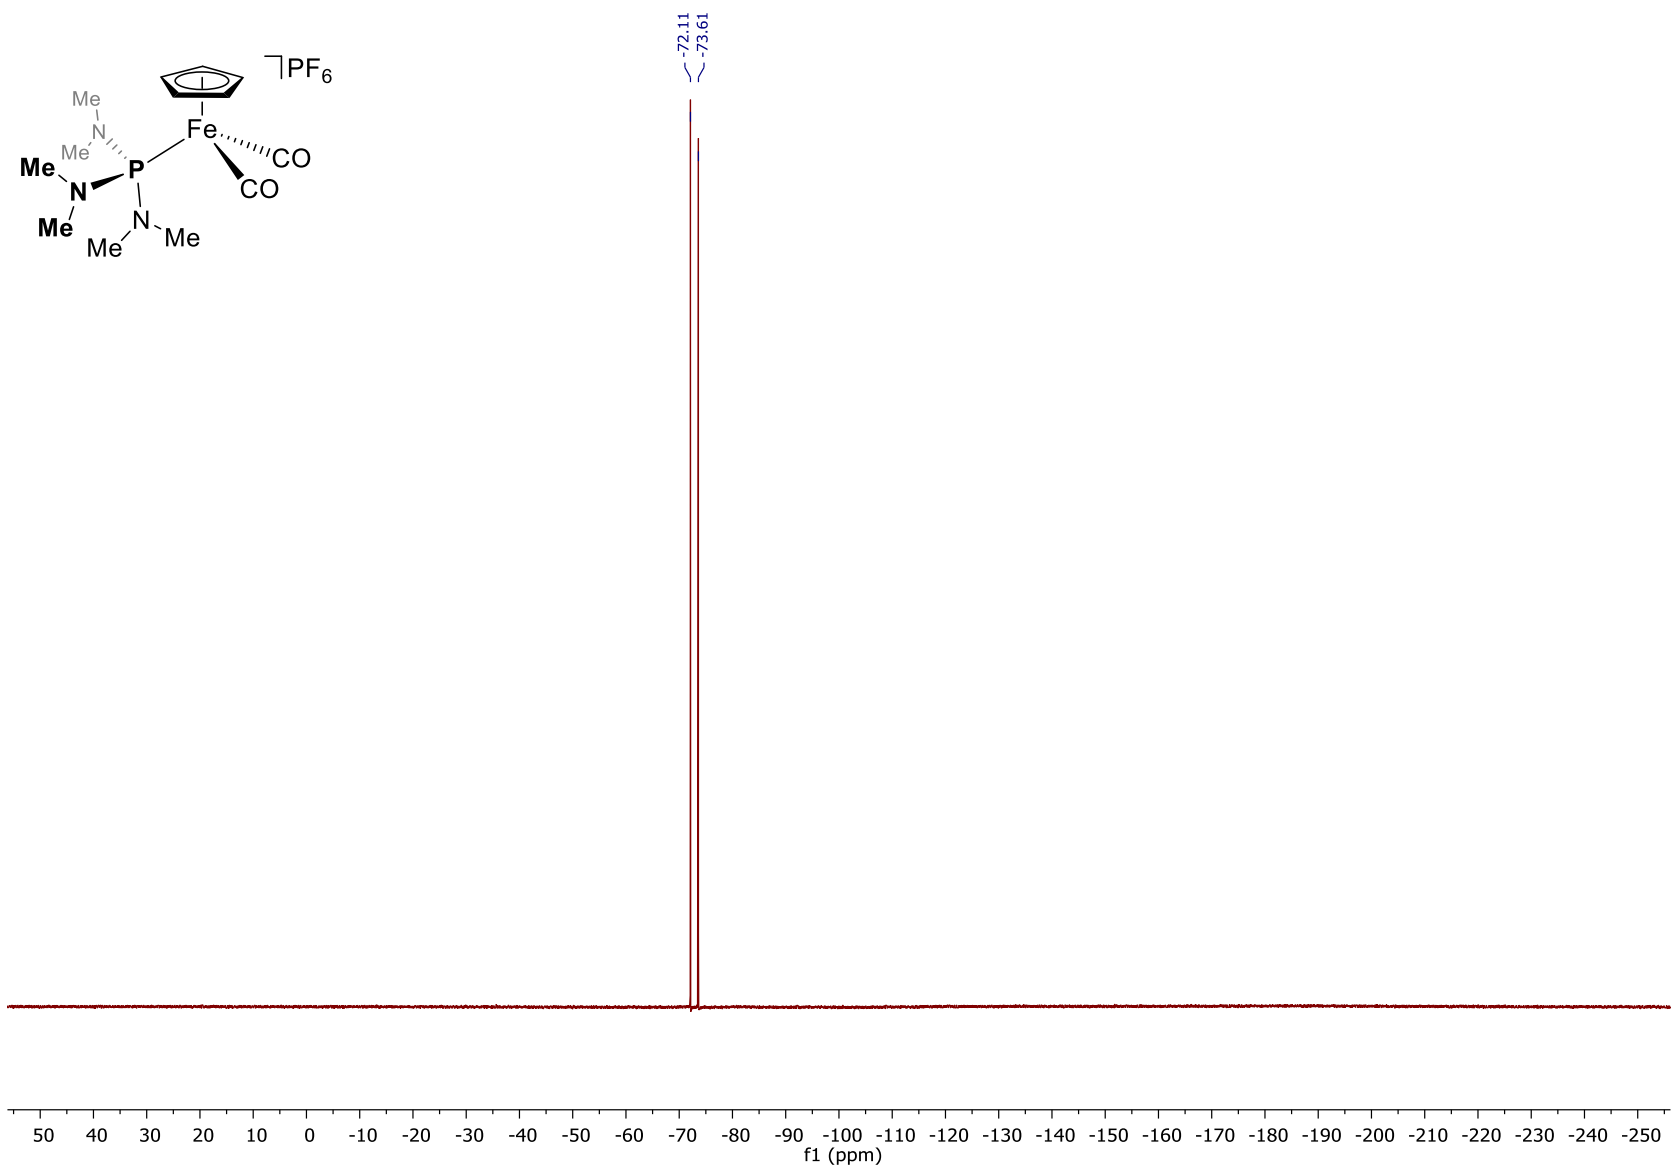

Figure S19.  $^{19}F$  NMR of  $1b \cdot Fp^+$ .

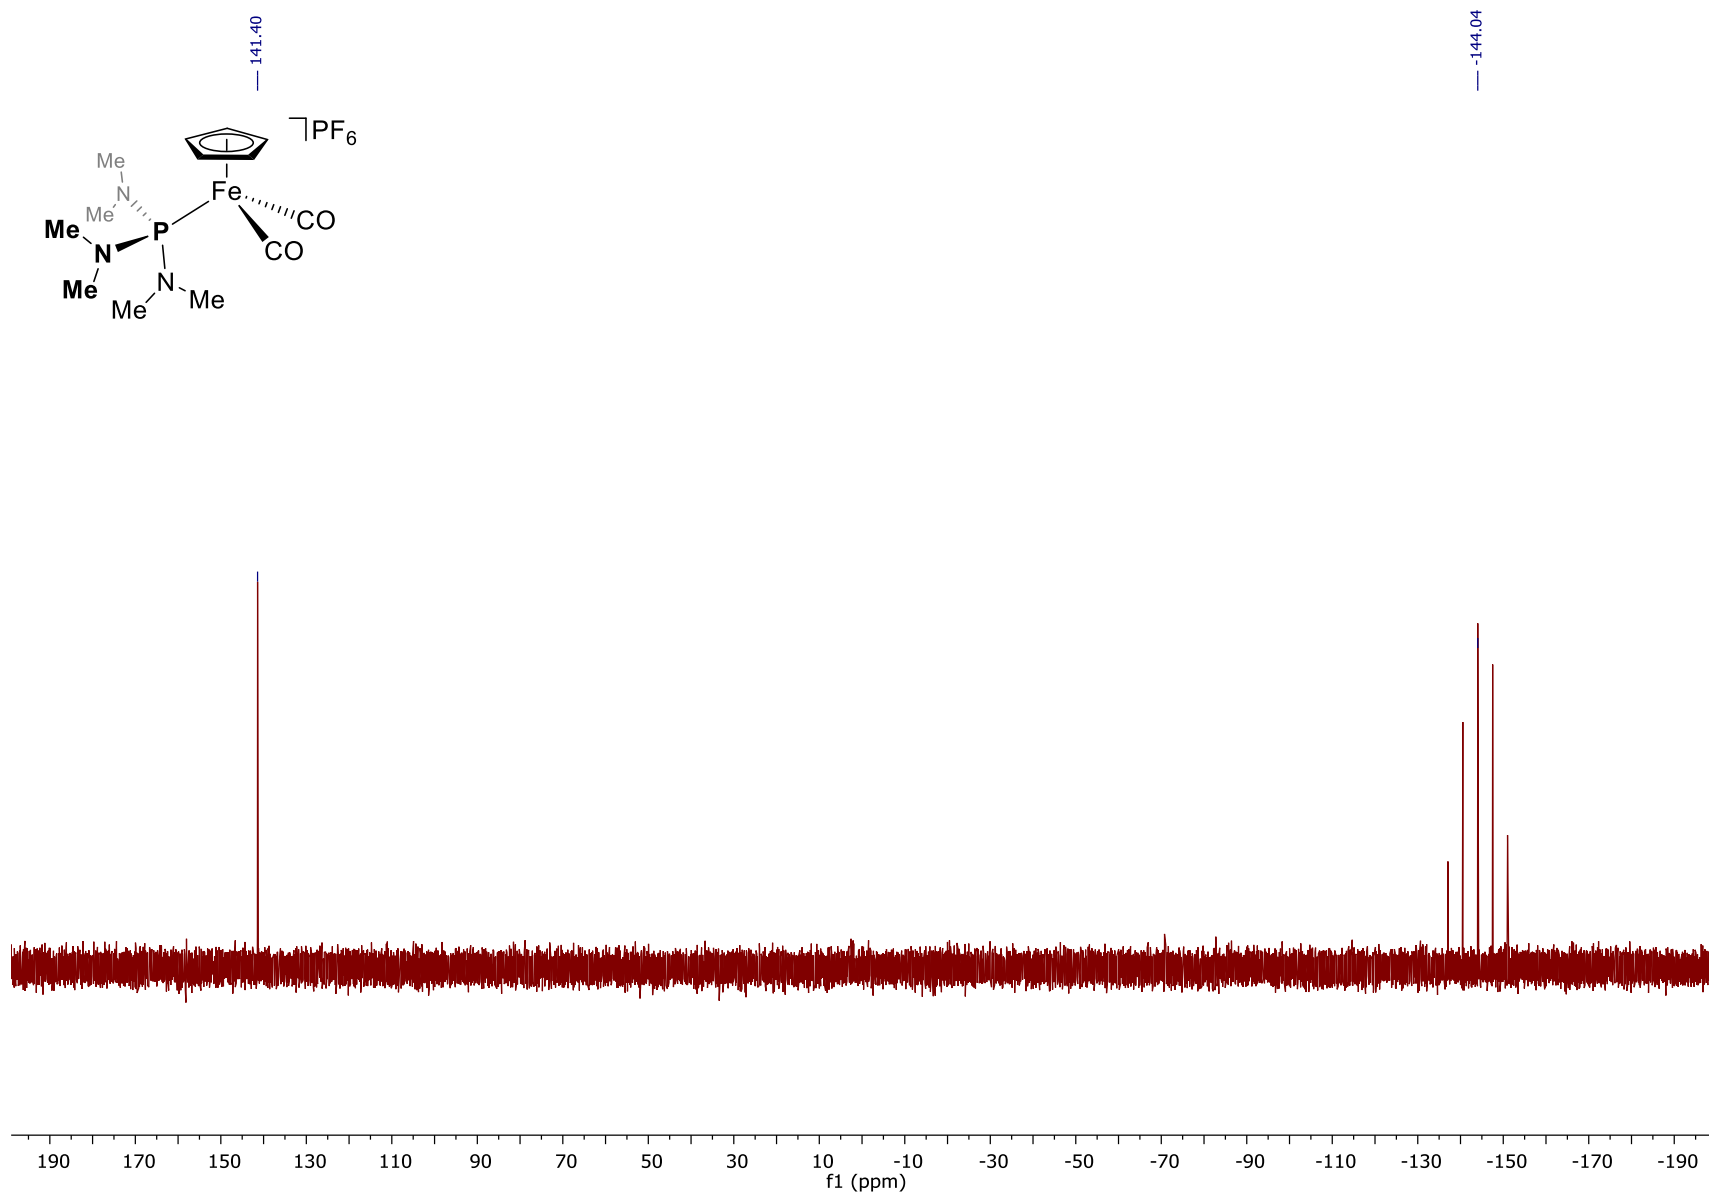

Figure S20.  $^{31}P\{^1H\}$  NMR of  $1b \cdot Fp^+$ .

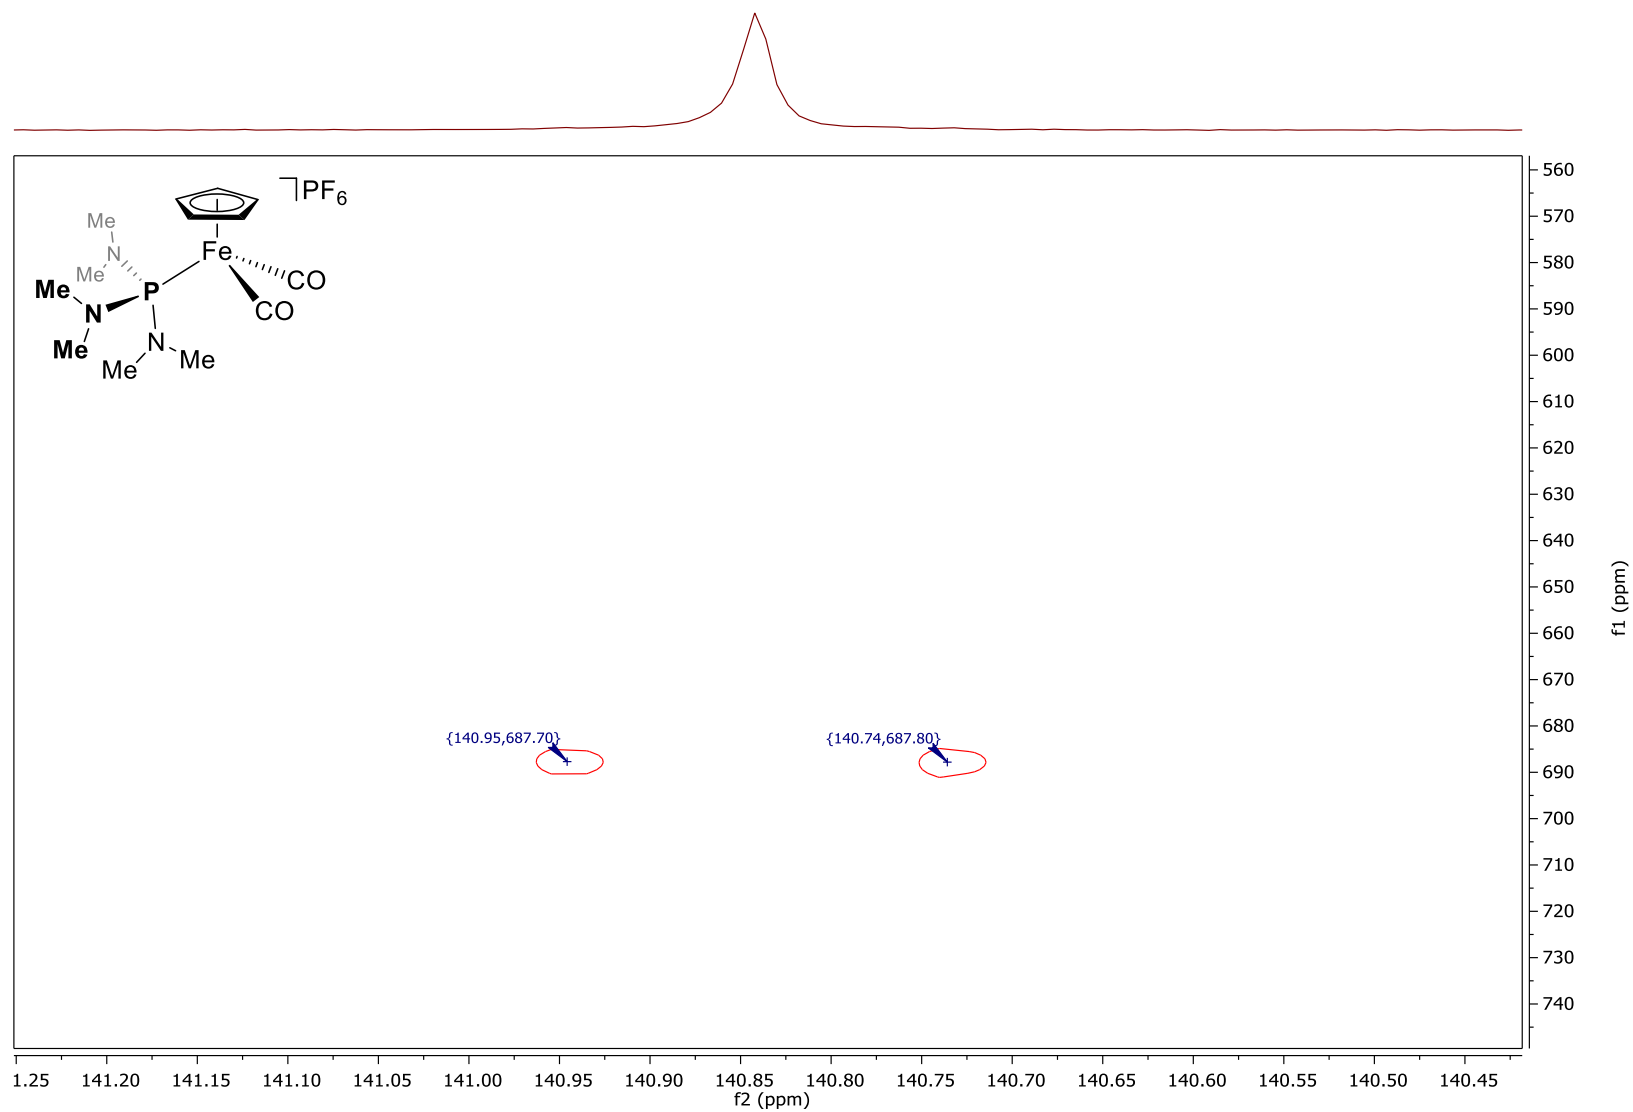

**Figure S21.** <sup>31</sup>P-<sup>57</sup>Fe 2D NMR of **1b**•Fp<sup>+</sup>. f1 is <sup>57</sup>Fe and f2 is <sup>31</sup>P. 1-D <sup>31</sup>P{<sup>1</sup>H} NMR shown along top horizontal axis

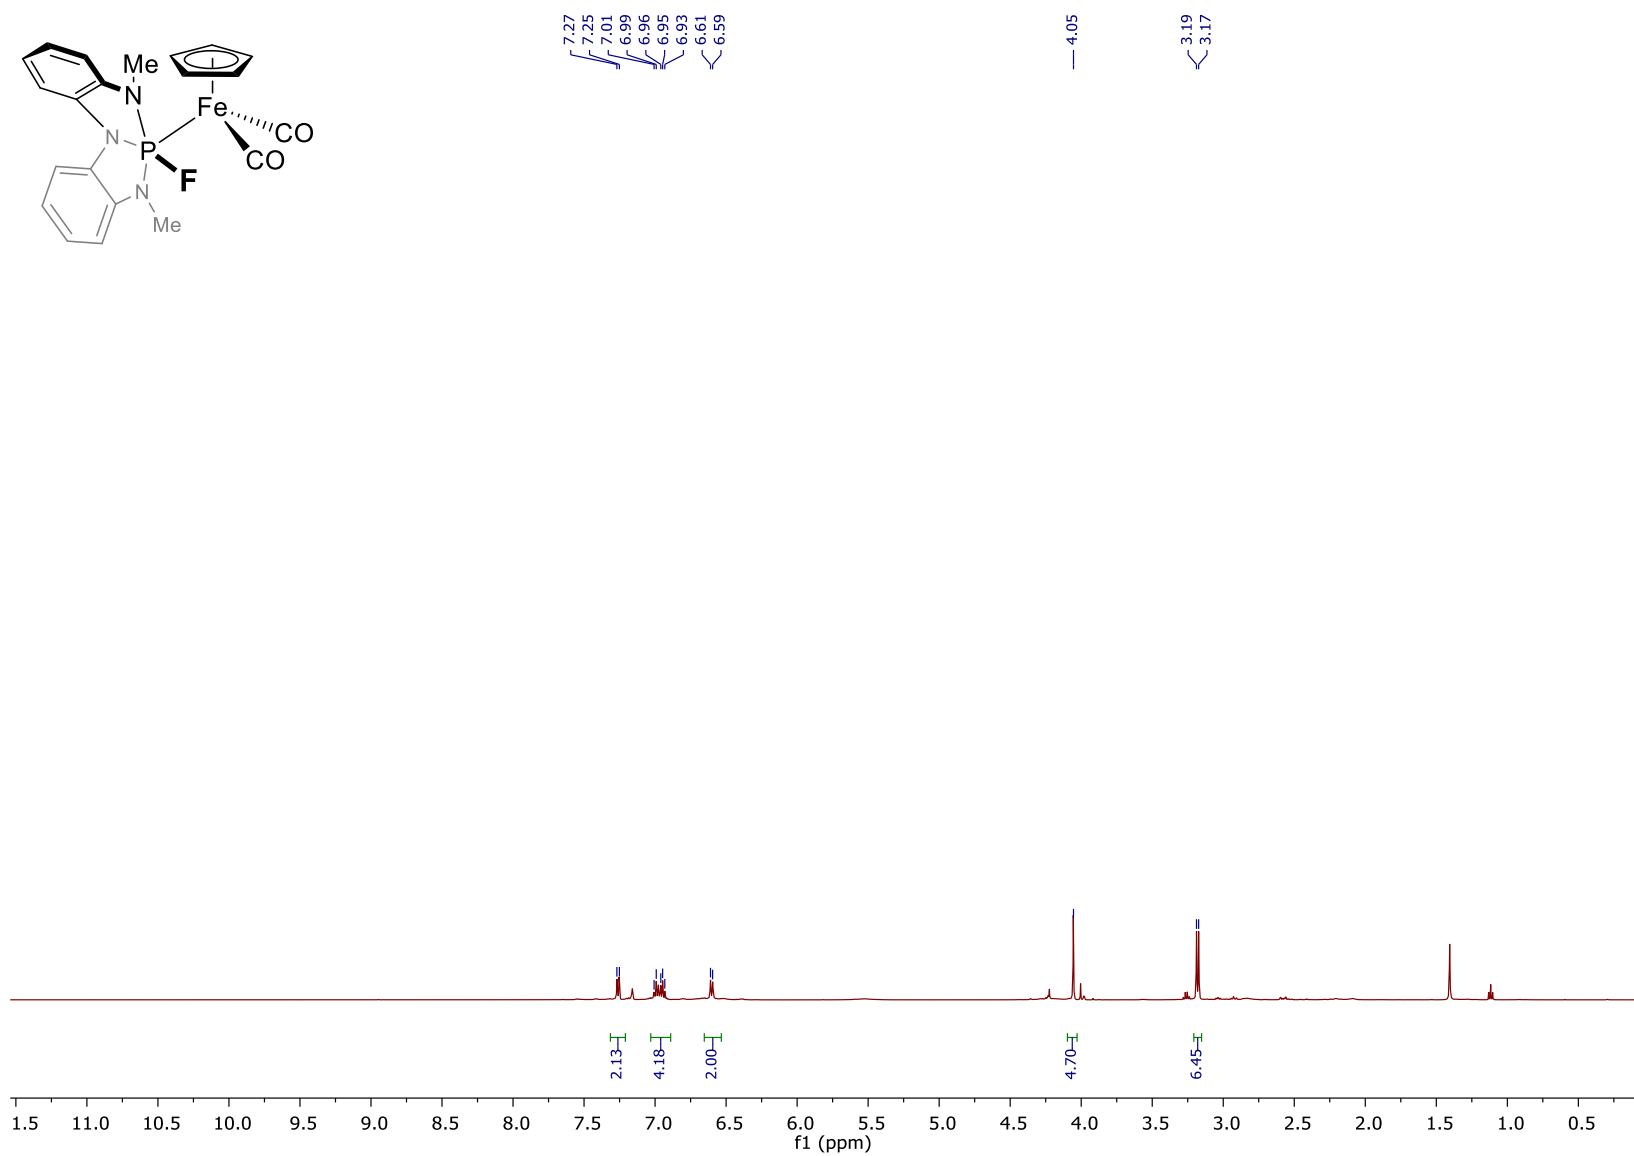

Figure S22.  $^1H$  NMR of  $1a^F \cdot Fp$ .

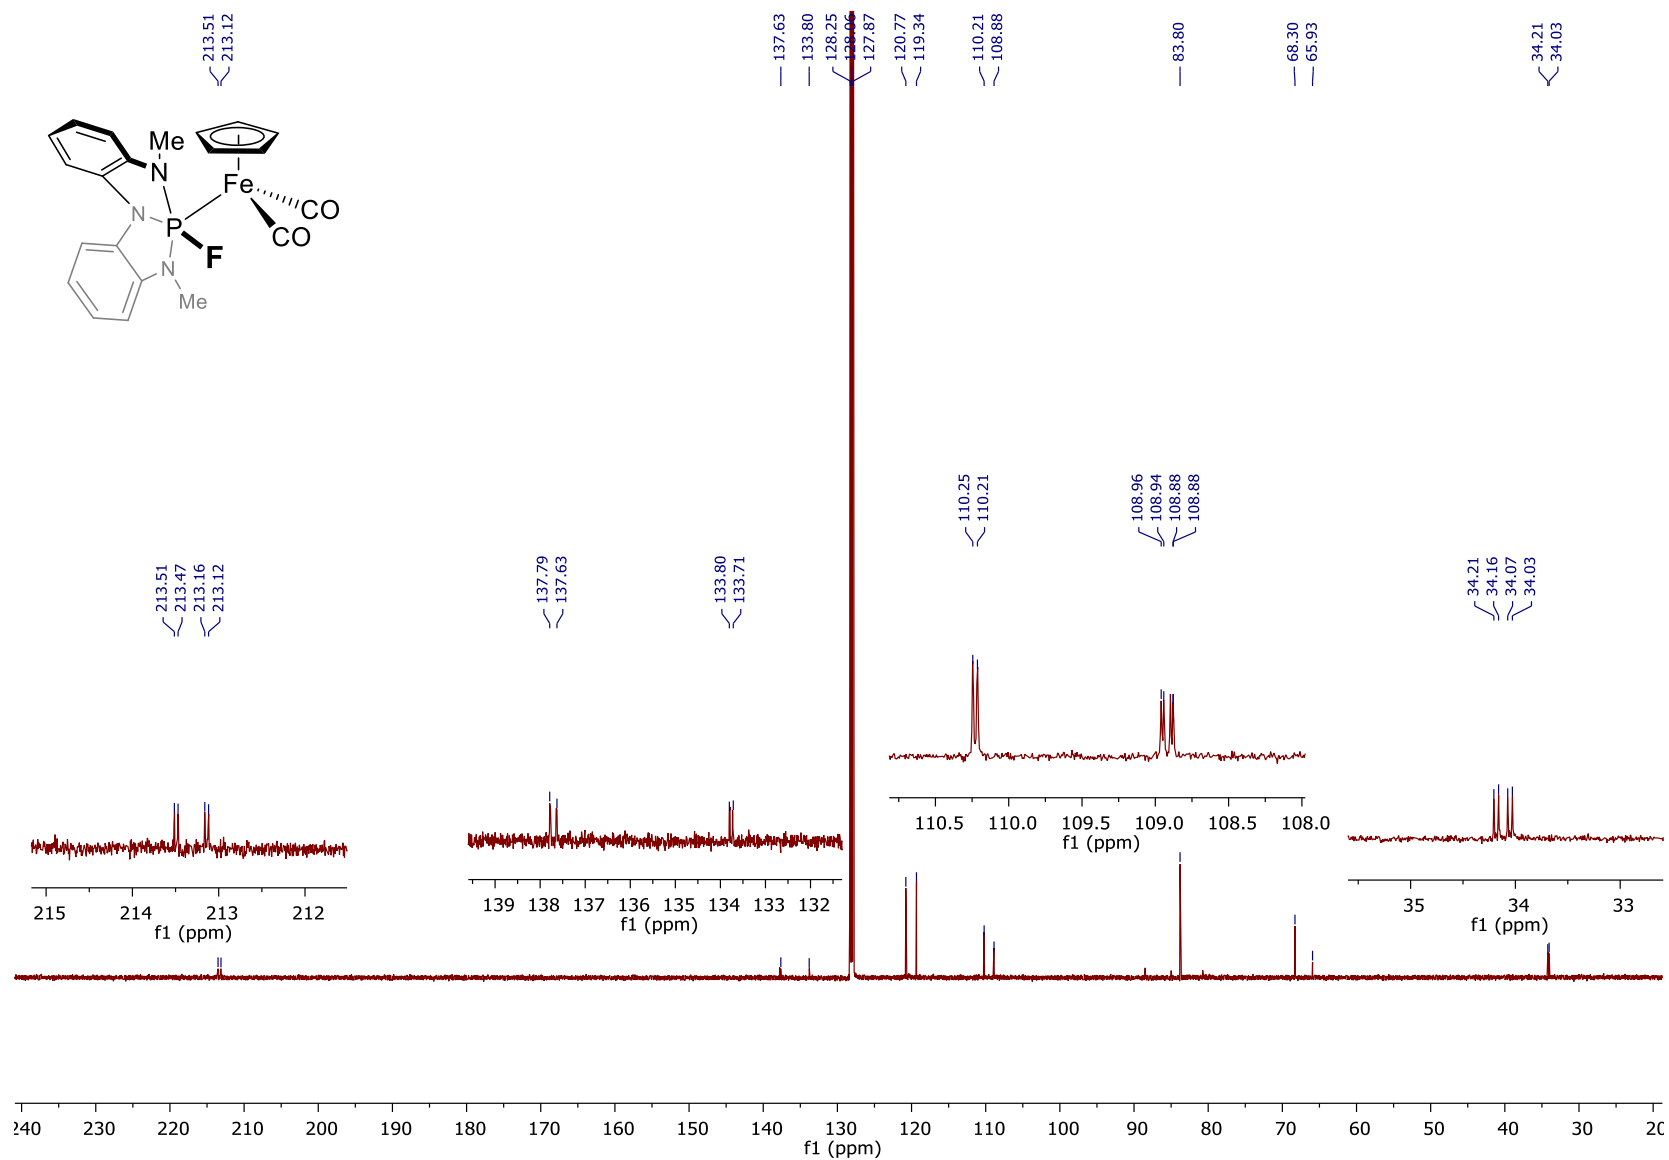

Figure S23.  $^{13}C\{^1H\}$  NMR of  $1a^F \cdot Fp$ .

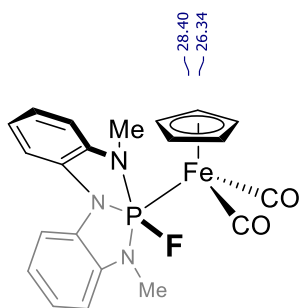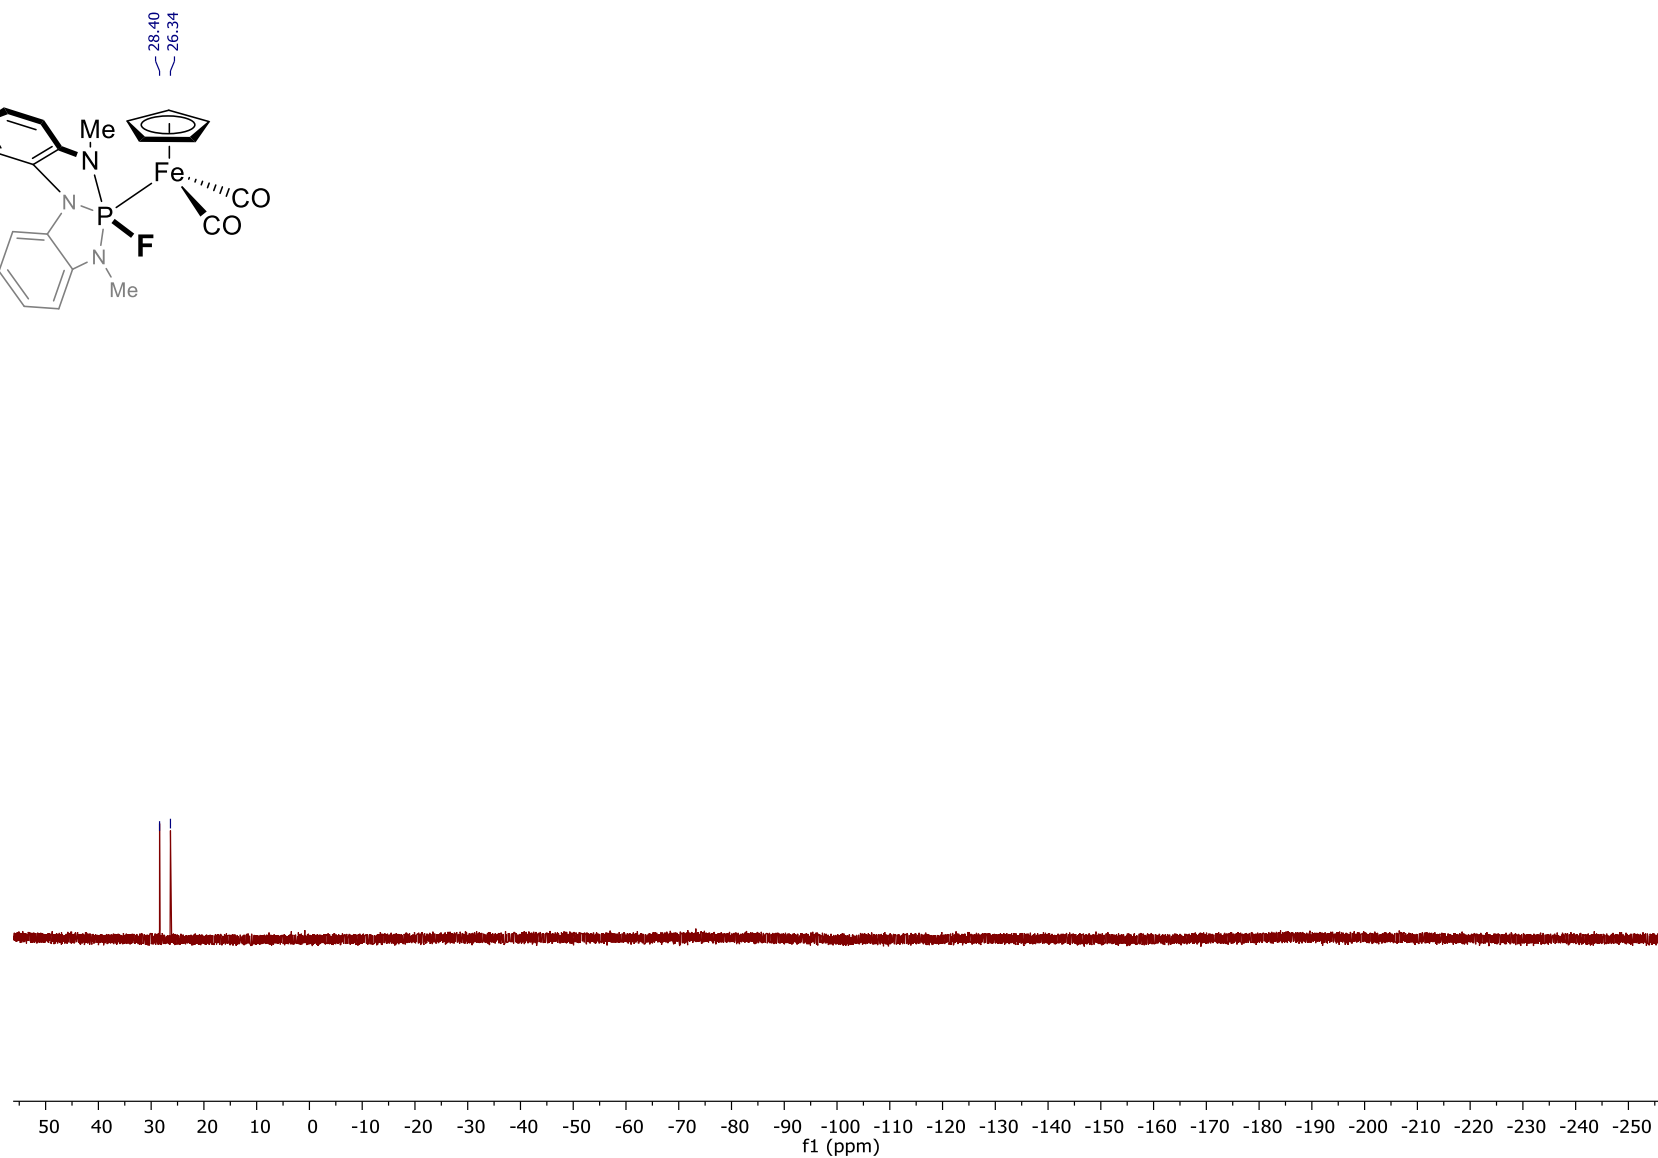

Figure S24.  $^{19}\text{F}$  NMR of  $1\text{a}^{\text{F}}\cdot\text{Fp}$ .



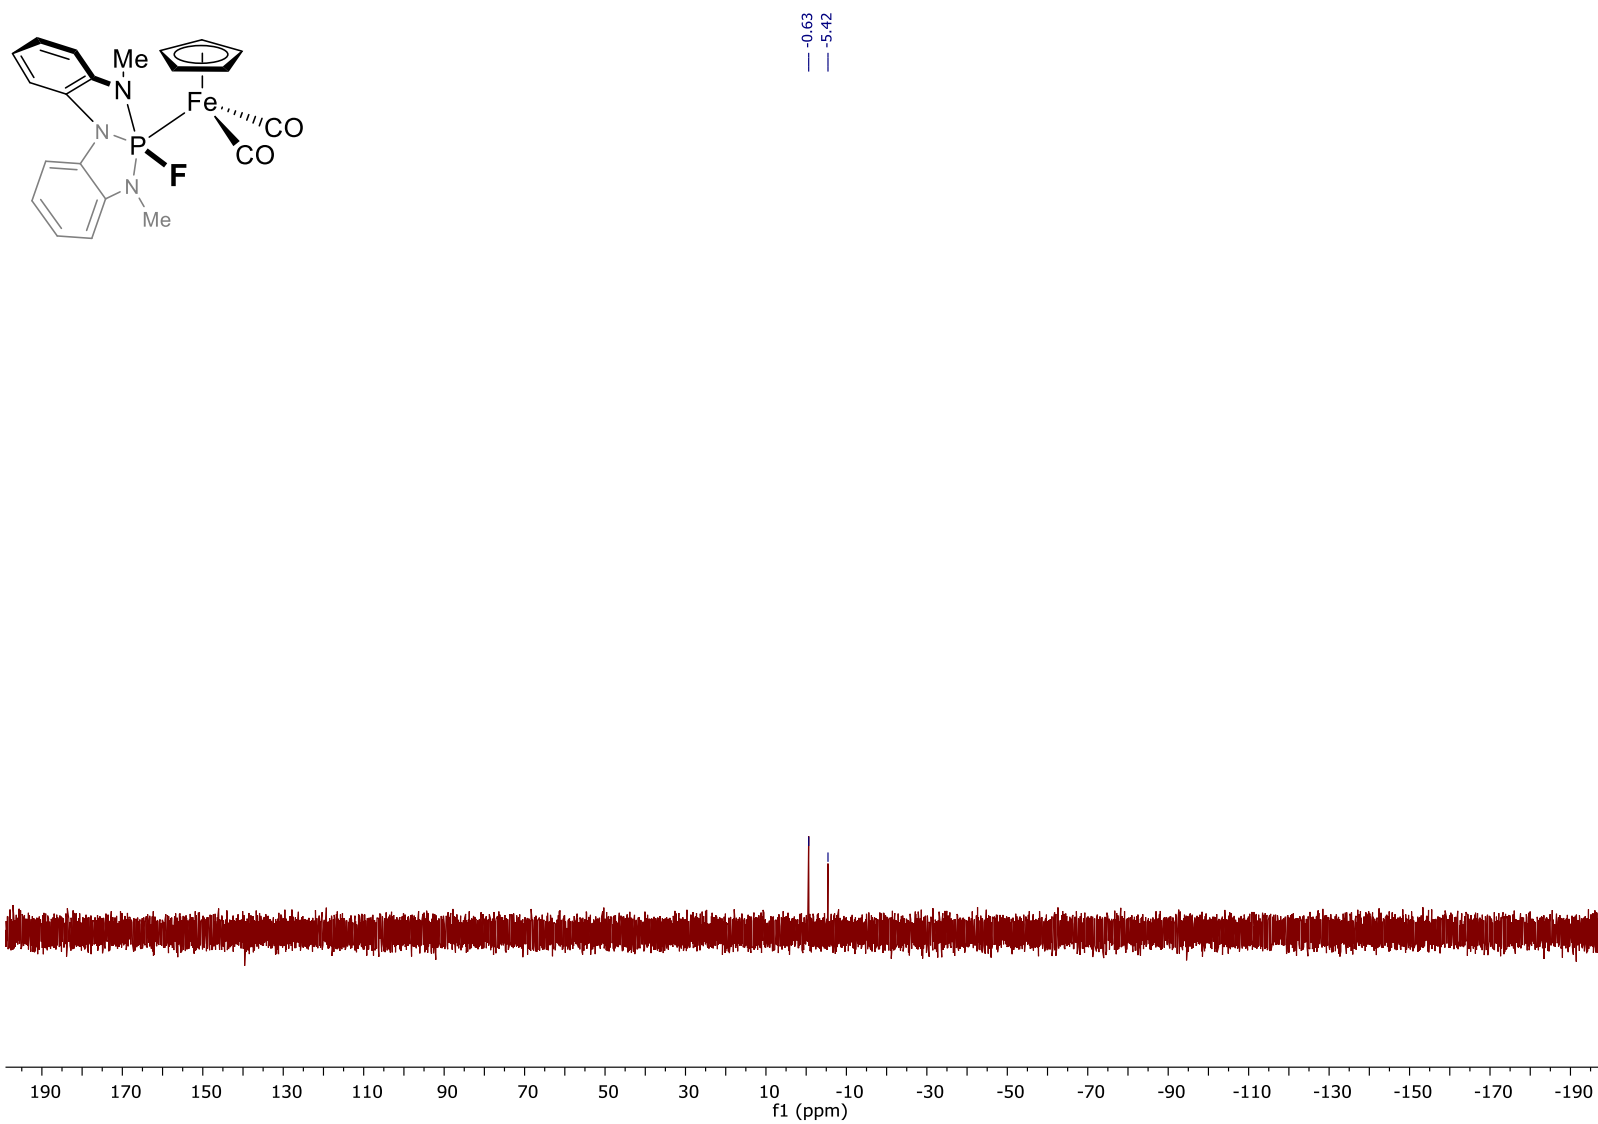

Figure S25.  $^{31}P\{^1H\}$  NMR of  $1a^F \cdot Fp$ .

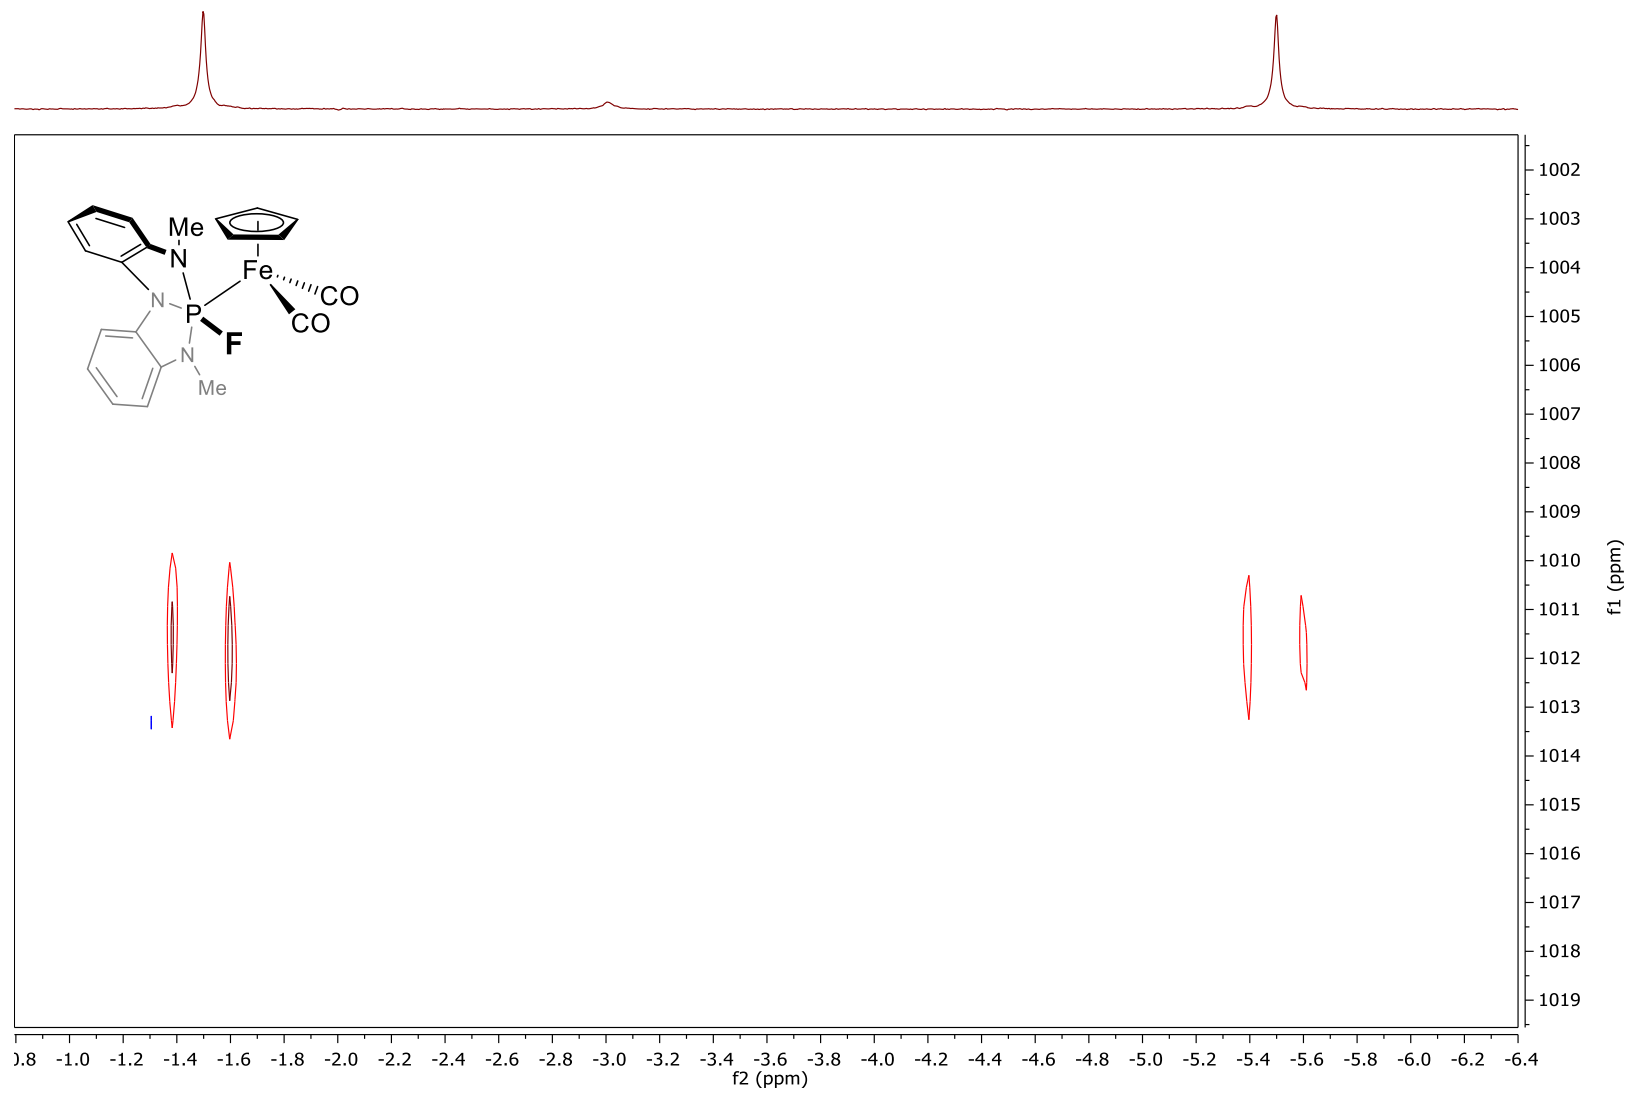

**Figure S26.**  $^{31}\text{P}$ - $^{57}\text{Fe}$  2D NMR of **1a<sup>F</sup>**•Fp. f1 is  $^{57}\text{Fe}$  and f2 is  $^{31}\text{P}$ . 1-D  $^{31}\text{P}\{^1\text{H}\}$  NMR shown along top horizontal axis

## VI. References

- 1 Pangborn, A.B.; Giardello, M. A.; Grubbs, R. H.; Rosen, R. K.; Timmers, F. J. *Organometallics*, **1996**, 15, 1518–1520.
- 2 Alaimo, P. J.; Peters, D. W.; Arnold, J.; Bergman, R. G. *J. Chem. Educ.* **2001**, 78, 64.
- 3 Bruker, *SAINT*, 2012, Bruker AXS Inc., Madison, Wisconsin, USA.
- 4 Bruker, *SADABS*, 2001, Bruker AXS Inc., Madison, Wisconsin, USA.
- 5 Sheldrick, G. M. *Acta. Cryst.* **2008**, A64, 112-122.
- 6 Zhao, W.; McCarthy, S. M.; Lai, T. Y.; Yennawar, H. P.; Radosevich, A. T. *J. Am. Chem. Soc.* **2014**, 136 (50), 17634–17644.
- 7 Catheline, D.; Astruc, D. *Organometallics*. **1984**, 3 (7), 1094–1100.
- 8 Neese, F. *WIREs Comput. Mol. Sci.* **2012**, 2, 73–78.
- 9 Zhao, Y.; Truhlar, D. G. *J. Chem. Phys.* **2006**, 125, 194101.
- 10 Weigend, F.; Ahlrichs, R. *Phys. Chem. Chem. Phys.* **2005**, 7, 3297-3305.
- 11 a) NBO 6.0, Glendening, E. D.; Badenhoop, J. K.; Reed, A. E.; Carpenter, J. E.; Bohmann, J. A.; Morales, C. M.; Landis, C. R.; Weinhold, F. Theoretical Chemistry Institute, University of Wisconsin, Madison, 2013 (<http://nbo6.chem.wisc.edu>) b) Glendening, E. D.; Landis, C. R.; Weinhold, F. *WIREs Comput. Mol. Sci.* **2012**, 2, 1-42 c) Glendening, E. D.; Landis, C. R.; Weinhold, F. *J. Comput. Chem.* **2013**, 34, 1429-1437.
- 12 Jmol: an open-source Java viewer for chemical structures in 3D. <http://www.jmol.org/>
- 13 Mitoraj, M. P.; Michalak, A.; Ziegler, T. *J. Chem. Theory Comput.* **2009**, 5 (4), 962–975.
- 14 ADF2019, SCM, Theoretical Chemistry, Vrije Universiteit, Amsterdam, The Netherlands, <http://www.scm.com>.
- 15 Becke, A. D. *Phys. Rev. A*. **1988**, 38, 3098-3100.
- 16 Bader, R. F. W. *Atoms in Molecules, A Quantum Theory*. Oxford University Press, Oxford, 1990.
- 17 Lu, T. *Multiwfn: A Multifunctional Wavefunction Analyzer*; Beijing Kein Research Center for Natural Sciences, Beijing, 2015.
- 18 Christe, K. O.; Dixon, D. A.; McLemore, D.; Wilson, W. W.; Sheehy, J. A.; Boatz, J. A. *J. Fluorine Chem.*, **2000**, 101, 151–153.
- 19 Slattery, J. M.; Hussein, S. *Dalton Trans.*, **2012**, 41, 1808-1815.
